# Supplementary material for: An Adversarial Dynamic Game to Controlling Information Diffusion under Typical Strategies on Online Social Networks
Source: Frontiers journal article supplement (doi:10.3389/fphy.2022.934741), 2022-08-31
Supplement: Table_2.XLSX [file Table_2.XLSX]

## Sheet: 2
kb	ks	CC-CC	CC-H_index	CC-K_shell	CC-EC	CC-LR	CC-R	CC-LC	CC-ECC	H_index-CC	H_index-H_index	H_index-K_shell	H_index-EC	H_index-LR	H_index-R	H_index-LC	H_index-ECC	K_shell-CC	K_shell-H_index	K_shell-K_shell	K_shell-EC	K_shell-LR	K_shell-R	K_shell-LC	K_shell-ECC	EC-CC	EC-H_index	EC-K_shell	EC-EC	EC-LR	EC-R	EC-LC	EC-ECC	LR-CC	LR-H_index	LR-K_shell	LR-EC	LR-LR	LR-R	LR-LC	LR-ECC	R-CC	R-H_index	R-K_shell	R-EC	R-LR	R-R	R-LC	R-ECC
50	50	0.088	0.152	0.126	0.088	0.203	0.081	0.161	0.056	0.079	0.156	0.126	0.084	0.209	0.073	0.164	0.058	0.106	0.16	0.128	0.099	0.174	0.085	0.171	0.061	0.08	0.15	0.129	0.079	0.208	0.089	0.162	0.062	0.071	0.148	0.121	0.062	0.171	0.089	0.154	0.057	0.765	0.761	0.763	0.767	0.766	0.503	0.765	0.094
	100	0.127	0.227	0.228	0.129	0.294	0.164	0.241	0.114	0.12	0.232	0.232	0.117	0.299	0.178	0.244	0.114	0.143	0.233	0.231	0.146	0.264	0.184	0.25	0.117	0.114	0.229	0.23	0.118	0.3	0.171	0.242	0.111	0.119	0.224	0.226	0.118	0.244	0.168	0.234	0.109	0.78	0.775	0.775	0.776	0.78	0.235	0.778	0.17
	150	0.166	0.29	0.313	0.159	0.356	0.243	0.317	0.165	0.174	0.294	0.32	0.167	0.358	0.243	0.318	0.159	0.182	0.29	0.316	0.177	0.312	0.257	0.324	0.172	0.164	0.293	0.318	0.16	0.36	0.245	0.318	0.158	0.155	0.291	0.315	0.152	0.303	0.259	0.311	0.155	0.79	0.786	0.787	0.785	0.794	0.345	0.785	0.24
	200	0.207	0.346	0.38	0.207	0.385	0.323	0.377	0.207	0.209	0.349	0.384	0.209	0.388	0.311	0.378	0.206	0.221	0.349	0.384	0.219	0.368	0.316	0.384	0.222	0.224	0.349	0.384	0.209	0.387	0.309	0.378	0.21	0.216	0.345	0.379	0.24	0.357	0.31	0.373	0.205	0.797	0.795	0.796	0.798	0.802	0.402	0.796	0.315
	250	0.267	0.393	0.418	0.282	0.453	0.371	0.418	0.26	0.268	0.396	0.421	0.26	0.458	0.367	0.419	0.26	0.257	0.399	0.422	0.257	0.368	0.381	0.424	0.253	0.268	0.396	0.42	0.272	0.455	0.367	0.418	0.261	0.284	0.397	0.416	0.273	0.357	0.377	0.414	0.266	0.801	0.802	0.802	0.8	0.806	0.741	0.801	0.381
	300	0.329	0.426	0.466	0.347	0.469	0.45	0.464	0.315	0.326	0.428	0.469	0.322	0.472	0.439	0.466	0.314	0.322	0.431	0.469	0.328	0.368	0.436	0.47	0.311	0.324	0.427	0.468	0.348	0.471	0.431	0.465	0.312	0.348	0.423	0.465	0.328	0.357	0.424	0.461	0.319	0.803	0.804	0.806	0.802	0.812	0.538	0.803	0.456
	350	0.359	0.452	0.506	0.396	0.469	0.49	0.508	0.365	0.362	0.452	0.508	0.376	0.472	0.496	0.51	0.366	0.368	0.453	0.507	0.373	0.368	0.504	0.513	0.366	0.363	0.453	0.507	0.398	0.471	0.48	0.509	0.367	0.357	0.448	0.504	0.373	0.359	0.504	0.505	0.371	0.806	0.809	0.81	0.805	0.813	0.765	0.804	0.57
	400	0.431	0.463	0.547	0.438	0.469	0.543	0.552	0.439	0.428	0.466	0.549	0.473	0.472	0.542	0.554	0.438	0.426	0.467	0.551	0.429	0.444	0.539	0.557	0.442	0.427	0.465	0.548	0.427	0.471	0.556	0.553	0.439	0.431	0.46	0.546	0.438	0.437	0.538	0.549	0.435	0.809	0.811	0.811	0.81	0.817	0.845	0.811	0.72
	450	0.467	0.469	0.595	0.512	0.469	0.597	0.588	0.469	0.47	0.471	0.597	0.494	0.472	0.591	0.591	0.47	0.47	0.473	0.596	0.467	0.474	0.596	0.592	0.47	0.469	0.47	0.597	0.496	0.471	0.606	0.589	0.469	0.465	0.465	0.595	0.509	0.465	0.597	0.586	0.465	0.815	0.814	0.814	0.813	0.82	0.86	0.816	0.739
	500	0.5	0.5	0.64	0.533	0.5	0.645	0.614	0.5	0.5	0.5	0.64	0.578	0.5	0.642	0.617	0.5	0.5	0.5	0.64	0.526	0.5	0.647	0.618	0.5	0.5	0.5	0.641	0.564	0.5	0.649	0.615	0.5	0.5	0.5	0.64	0.564	0.5	0.646	0.612	0.5	0.817	0.817	0.817	0.816	0.821	0.719	0.817	0.76
100	50	0.095	0.106	0.111	0.06	0.121	0.074	0.1	0.073	0.089	0.109	0.114	0.062	0.121	0.078	0.113	0.071	0.089	0.113	0.115	0.062	0.163	0.091	0.107	0.07	0.101	0.109	0.114	0.061	0.163	0.073	0.093	0.075	0.096	0.105	0.118	0.059	0.114	0.075	0.09	0.067	0.726	0.717	0.719	0.723	0.725	0.122	0.722	0.092
	100	0.136	0.186	0.219	0.115	0.216	0.159	0.193	0.122	0.135	0.185	0.224	0.115	0.218	0.148	0.192	0.124	0.139	0.192	0.224	0.148	0.234	0.155	0.192	0.119	0.133	0.187	0.22	0.105	0.219	0.142	0.188	0.129	0.132	0.188	0.217	0.117	0.207	0.146	0.177	0.123	0.734	0.733	0.732	0.734	0.737	0.201	0.734	0.163
	150	0.198	0.256	0.269	0.186	0.225	0.213	0.261	0.18	0.203	0.254	0.28	0.235	0.236	0.219	0.263	0.186	0.192	0.26	0.278	0.168	0.31	0.217	0.264	0.183	0.216	0.256	0.267	0.168	0.307	0.208	0.258	0.181	0.207	0.253	0.265	0.174	0.207	0.2	0.246	0.189	0.746	0.743	0.743	0.741	0.748	0.623	0.739	0.239
	200	0.225	0.302	0.315	0.26	0.225	0.273	0.314	0.222	0.236	0.299	0.323	0.236	0.236	0.284	0.314	0.23	0.234	0.299	0.319	0.234	0.35	0.284	0.315	0.227	0.219	0.297	0.313	0.221	0.345	0.272	0.315	0.225	0.207	0.289	0.313	0.227	0.207	0.269	0.303	0.239	0.751	0.75	0.75	0.751	0.754	0.673	0.751	0.306
	250	0.269	0.336	0.361	0.295	0.271	0.347	0.362	0.297	0.26	0.338	0.368	0.296	0.262	0.35	0.362	0.296	0.262	0.336	0.365	0.269	0.36	0.346	0.363	0.296	0.275	0.334	0.357	0.274	0.357	0.33	0.364	0.305	0.283	0.322	0.356	0.258	0.283	0.327	0.354	0.305	0.753	0.753	0.753	0.753	0.756	0.476	0.753	0.376
	300	0.335	0.351	0.412	0.319	0.337	0.404	0.411	0.345	0.332	0.351	0.414	0.322	0.332	0.392	0.412	0.342	0.332	0.35	0.411	0.355	0.36	0.402	0.412	0.344	0.333	0.347	0.411	0.316	0.357	0.402	0.412	0.341	0.329	0.343	0.408	0.321	0.329	0.386	0.404	0.333	0.754	0.755	0.754	0.755	0.761	0.547	0.754	0.477
	350	0.361	0.363	0.46	0.372	0.361	0.45	0.458	0.361	0.362	0.364	0.461	0.391	0.362	0.448	0.459	0.362	0.358	0.36	0.46	0.431	0.36	0.453	0.46	0.358	0.357	0.357	0.46	0.408	0.357	0.454	0.459	0.357	0.35	0.35	0.459	0.425	0.35	0.45	0.452	0.35	0.758	0.758	0.759	0.757	0.763	0.788	0.757	0.556
	400	0.4	0.4	0.51	0.439	0.4	0.506	0.501	0.4	0.4	0.4	0.512	0.442	0.4	0.507	0.502	0.4	0.4	0.4	0.513	0.434	0.4	0.508	0.503	0.4	0.4	0.4	0.508	0.412	0.4	0.506	0.501	0.4	0.4	0.4	0.509	0.43	0.4	0.496	0.495	0.4	0.762	0.762	0.762	0.76	0.769	0.792	0.762	0.688
	450	0.45	0.45	0.554	0.464	0.45	0.548	0.533	0.45	0.45	0.45	0.556	0.492	0.45	0.545	0.536	0.45	0.45	0.45	0.557	0.487	0.45	0.553	0.537	0.45	0.45	0.45	0.554	0.491	0.45	0.551	0.533	0.45	0.45	0.45	0.553	0.498	0.45	0.557	0.53	0.45	0.766	0.765	0.765	0.765	0.769	0.71	0.766	0.707
	500	0.5	0.5	0.597	0.531	0.5	0.607	0.583	0.5	0.5	0.5	0.599	0.524	0.5	0.607	0.586	0.5	0.5	0.5	0.601	0.52	0.5	0.592	0.587	0.5	0.5	0.5	0.594	0.525	0.5	0.606	0.583	0.5	0.5	0.5	0.594	0.53	0.5	0.601	0.58	0.5	0.766	0.767	0.767	0.765	0.771	0.728	0.768	0.722
150	50	0.075	0.097	0.118	0.061	0.14	0.067	0.088	0.065	0.065	0.101	0.125	0.057	0.147	0.077	0.095	0.066	0.076	0.101	0.125	0.067	0.143	0.074	0.091	0.064	0.083	0.102	0.119	0.062	0.109	0.069	0.094	0.068	0.102	0.096	0.113	0.059	0.12	0.076	0.08	0.075	0.687	0.68	0.682	0.684	0.688	0.539	0.683	0.092
	100	0.142	0.176	0.186	0.102	0.212	0.127	0.163	0.125	0.154	0.176	0.196	0.119	0.216	0.138	0.173	0.13	0.149	0.177	0.194	0.133	0.217	0.141	0.169	0.13	0.151	0.179	0.188	0.11	0.151	0.136	0.17	0.13	0.102	0.175	0.167	0.141	0.204	0.13	0.145	0.136	0.696	0.692	0.691	0.693	0.699	0.194	0.695	0.162
	150	0.158	0.226	0.231	0.165	0.268	0.205	0.226	0.192	0.154	0.23	0.241	0.198	0.274	0.198	0.236	0.188	0.151	0.232	0.239	0.163	0.273	0.193	0.232	0.187	0.151	0.231	0.238	0.18	0.151	0.194	0.232	0.185	0.188	0.213	0.221	0.165	0.25	0.181	0.212	0.21	0.705	0.703	0.703	0.702	0.707	0.363	0.701	0.242
	200	0.238	0.267	0.285	0.218	0.288	0.262	0.28	0.25	0.232	0.273	0.29	0.267	0.296	0.26	0.289	0.252	0.235	0.27	0.289	0.236	0.291	0.264	0.286	0.249	0.235	0.27	0.287	0.206	0.235	0.264	0.285	0.249	0.238	0.249	0.273	0.215	0.266	0.248	0.269	0.246	0.709	0.706	0.706	0.709	0.712	0.596	0.709	0.303
	250	0.276	0.286	0.332	0.269	0.288	0.327	0.333	0.278	0.282	0.292	0.338	0.314	0.296	0.32	0.343	0.284	0.277	0.289	0.335	0.262	0.291	0.323	0.342	0.279	0.279	0.291	0.336	0.262	0.279	0.318	0.338	0.281	0.264	0.264	0.324	0.319	0.266	0.32	0.325	0.264	0.711	0.71	0.711	0.711	0.718	0.428	0.712	0.382
	300	0.3	0.3	0.381	0.32	0.3	0.373	0.382	0.3	0.3	0.3	0.387	0.32	0.3	0.38	0.392	0.3	0.3	0.3	0.385	0.318	0.3	0.373	0.391	0.3	0.3	0.3	0.385	0.338	0.3	0.386	0.386	0.3	0.3	0.3	0.378	0.33	0.3	0.369	0.376	0.3	0.712	0.716	0.716	0.712	0.719	0.692	0.712	0.49
	350	0.35	0.35	0.433	0.383	0.35	0.423	0.429	0.35	0.35	0.35	0.439	0.375	0.35	0.442	0.437	0.35	0.35	0.35	0.438	0.36	0.35	0.421	0.436	0.35	0.35	0.35	0.439	0.379	0.35	0.432	0.433	0.35	0.35	0.35	0.43	0.37	0.35	0.416	0.422	0.35	0.716	0.718	0.718	0.716	0.723	0.58	0.718	0.639
	400	0.4	0.4	0.484	0.418	0.4	0.485	0.469	0.4	0.4	0.4	0.486	0.421	0.4	0.468	0.472	0.4	0.4	0.4	0.486	0.407	0.4	0.486	0.471	0.4	0.4	0.4	0.488	0.405	0.4	0.477	0.471	0.4	0.4	0.4	0.48	0.434	0.4	0.473	0.462	0.4	0.723	0.722	0.721	0.72	0.727	0.712	0.723	0.656
	450	0.45	0.45	0.53	0.507	0.45	0.519	0.519	0.45	0.45	0.45	0.533	0.519	0.45	0.525	0.522	0.45	0.45	0.45	0.532	0.481	0.45	0.533	0.521	0.45	0.45	0.45	0.532	0.513	0.45	0.535	0.521	0.45	0.45	0.45	0.522	0.506	0.45	0.523	0.512	0.45	0.724	0.724	0.724	0.723	0.728	0.773	0.724	0.675
	500	0.5	0.5	0.579	0.533	0.5	0.579	0.561	0.5	0.5	0.5	0.577	0.545	0.5	0.581	0.562	0.5	0.5	0.5	0.577	0.566	0.5	0.57	0.562	0.5	0.5	0.5	0.58	0.523	0.5	0.579	0.563	0.5	0.5	0.5	0.57	0.515	0.5	0.575	0.554	0.5	0.725	0.726	0.725	0.726	0.731	0.797	0.726	0.692
200	50	0.085	0.092	0.101	0.063	0.115	0.066	0.077	0.07	0.094	0.095	0.114	0.056	0.12	0.068	0.094	0.072	0.094	0.093	0.115	0.068	0.103	0.066	0.094	0.072	0.086	0.092	0.103	0.063	0.116	0.066	0.074	0.07	0.054	0.09	0.087	0.058	0.054	0.062	0.069	0.072	0.65	0.64	0.642	0.648	0.649	0.099	0.648	0.085
	100	0.113	0.16	0.158	0.132	0.185	0.124	0.145	0.133	0.1	0.17	0.169	0.112	0.196	0.123	0.16	0.132	0.103	0.17	0.17	0.11	0.103	0.133	0.159	0.131	0.112	0.163	0.159	0.112	0.186	0.124	0.144	0.136	0.134	0.152	0.143	0.113	0.134	0.119	0.135	0.146	0.657	0.654	0.654	0.654	0.656	0.633	0.655	0.158
	150	0.183	0.204	0.21	0.185	0.219	0.198	0.204	0.187	0.184	0.211	0.217	0.159	0.232	0.194	0.214	0.196	0.183	0.212	0.218	0.162	0.183	0.198	0.214	0.197	0.184	0.205	0.211	0.203	0.22	0.191	0.205	0.188	0.186	0.188	0.196	0.167	0.186	0.184	0.195	0.19	0.663	0.66	0.66	0.661	0.665	0.504	0.662	0.233
	200	0.219	0.223	0.26	0.215	0.225	0.247	0.26	0.219	0.228	0.233	0.267	0.232	0.24	0.249	0.27	0.23	0.227	0.232	0.268	0.228	0.229	0.256	0.27	0.229	0.22	0.224	0.261	0.23	0.226	0.249	0.261	0.222	0.204	0.204	0.248	0.211	0.204	0.244	0.249	0.204	0.666	0.665	0.665	0.665	0.669	0.379	0.665	0.299
	250	0.25	0.25	0.312	0.269	0.25	0.301	0.313	0.25	0.25	0.25	0.317	0.292	0.25	0.309	0.321	0.25	0.25	0.25	0.318	0.273	0.25	0.313	0.321	0.25	0.25	0.25	0.311	0.266	0.25	0.317	0.313	0.25	0.25	0.25	0.301	0.258	0.25	0.298	0.305	0.25	0.668	0.667	0.668	0.667	0.671	0.427	0.668	0.378
	300	0.3	0.3	0.366	0.31	0.3	0.356	0.361	0.3	0.3	0.3	0.371	0.315	0.3	0.367	0.368	0.3	0.3	0.3	0.372	0.307	0.3	0.36	0.368	0.3	0.3	0.3	0.364	0.316	0.3	0.347	0.361	0.3	0.3	0.3	0.357	0.321	0.3	0.35	0.354	0.3	0.669	0.67	0.671	0.67	0.673	0.687	0.668	0.466
	350	0.35	0.35	0.414	0.356	0.35	0.411	0.402	0.35	0.35	0.35	0.421	0.372	0.35	0.424	0.405	0.35	0.35	0.35	0.422	0.393	0.35	0.413	0.405	0.35	0.35	0.35	0.414	0.389	0.35	0.411	0.402	0.35	0.35	0.35	0.41	0.363	0.35	0.406	0.398	0.35	0.674	0.671	0.671	0.674	0.679	0.577	0.674	0.604
	400	0.4	0.4	0.462	0.461	0.4	0.455	0.452	0.4	0.4	0.4	0.469	0.43	0.4	0.471	0.455	0.4	0.4	0.4	0.47	0.432	0.4	0.468	0.455	0.4	0.4	0.4	0.461	0.432	0.4	0.464	0.452	0.4	0.4	0.4	0.457	0.416	0.4	0.459	0.448	0.4	0.678	0.676	0.676	0.677	0.679	0.679	0.678	0.623
	450	0.45	0.45	0.508	0.46	0.45	0.514	0.498	0.45	0.45	0.45	0.514	0.467	0.45	0.515	0.498	0.45	0.45	0.45	0.515	0.464	0.45	0.513	0.498	0.45	0.45	0.45	0.506	0.463	0.45	0.516	0.498	0.45	0.45	0.45	0.507	0.457	0.45	0.502	0.491	0.45	0.678	0.677	0.677	0.68	0.683	0.683	0.68	0.639
	500	0.5	0.5	0.554	0.507	0.5	0.544	0.548	0.5	0.5	0.5	0.559	0.524	0.5	0.554	0.548	0.5	0.5	0.5	0.561	0.531	0.5	0.554	0.548	0.5	0.5	0.5	0.551	0.511	0.5	0.553	0.548	0.5	0.5	0.5	0.551	0.518	0.5	0.553	0.541	0.5	0.682	0.679	0.683	0.68	0.684	0.662	0.68	0.656
250	50	0.061	0.094	0.079	0.064	0.101	0.062	0.064	0.077	0.063	0.091	0.092	0.06	0.063	0.065	0.08	0.063	0.063	0.091	0.092	0.082	0.109	0.061	0.08	0.063	0.055	0.092	0.083	0.089	0.105	0.063	0.067	0.073	0.07	0.09	0.073	0.085	0.07	0.062	0.057	0.082	0.607	0.604	0.604	0.607	0.606	0.129	0.606	0.084
	100	0.135	0.142	0.132	0.149	0.155	0.117	0.125	0.137	0.129	0.146	0.146	0.105	0.129	0.124	0.143	0.141	0.129	0.146	0.146	0.136	0.169	0.126	0.142	0.141	0.137	0.145	0.135	0.15	0.163	0.118	0.13	0.139	0.126	0.132	0.127	0.103	0.126	0.119	0.121	0.132	0.613	0.611	0.611	0.612	0.615	0.229	0.611	0.157
	150	0.169	0.171	0.188	0.193	0.173	0.187	0.187	0.171	0.181	0.181	0.199	0.201	0.181	0.179	0.204	0.183	0.179	0.181	0.199	0.177	0.191	0.189	0.203	0.181	0.173	0.174	0.191	0.198	0.183	0.185	0.192	0.173	0.15	0.15	0.183	0.164	0.15	0.179	0.175	0.15	0.619	0.617	0.617	0.619	0.623	0.529	0.619	0.229
	200	0.2	0.2	0.241	0.262	0.2	0.239	0.243	0.2	0.2	0.2	0.252	0.241	0.2	0.234	0.257	0.2	0.2	0.2	0.252	0.262	0.2	0.246	0.256	0.2	0.2	0.2	0.242	0.209	0.2	0.238	0.248	0.2	0.2	0.2	0.235	0.228	0.2	0.221	0.233	0.2	0.624	0.621	0.623	0.624	0.627	0.416	0.623	0.3
	250	0.25	0.25	0.296	0.322	0.25	0.284	0.295	0.25	0.25	0.25	0.303	0.287	0.25	0.293	0.308	0.25	0.25	0.25	0.303	0.282	0.25	0.298	0.307	0.25	0.25	0.25	0.299	0.263	0.25	0.29	0.299	0.25	0.25	0.25	0.291	0.251	0.25	0.277	0.286	0.25	0.625	0.625	0.627	0.625	0.628	0.406	0.625	0.398
	300	0.3	0.3	0.348	0.358	0.3	0.34	0.339	0.3	0.3	0.3	0.355	0.335	0.3	0.349	0.346	0.3	0.3	0.3	0.355	0.349	0.3	0.344	0.345	0.3	0.3	0.3	0.351	0.343	0.3	0.346	0.343	0.3	0.3	0.3	0.344	0.302	0.3	0.334	0.331	0.3	0.627	0.627	0.627	0.627	0.631	0.587	0.627	0.551
	350	0.35	0.35	0.397	0.391	0.35	0.384	0.389	0.35	0.35	0.35	0.403	0.392	0.35	0.406	0.396	0.35	0.35	0.35	0.403	0.381	0.35	0.4	0.395	0.35	0.35	0.35	0.403	0.403	0.35	0.399	0.393	0.35	0.35	0.35	0.392	0.389	0.35	0.389	0.381	0.35	0.633	0.63	0.63	0.628	0.633	0.622	0.63	0.573
	400	0.4	0.4	0.445	0.407	0.4	0.454	0.438	0.4	0.4	0.4	0.448	0.424	0.4	0.446	0.443	0.4	0.4	0.4	0.448	0.43	0.4	0.453	0.442	0.4	0.4	0.4	0.449	0.437	0.4	0.456	0.442	0.4	0.4	0.4	0.44	0.411	0.4	0.436	0.431	0.4	0.633	0.631	0.631	0.631	0.635	0.64	0.632	0.592
	450	0.45	0.45	0.495	0.465	0.45	0.494	0.488	0.45	0.45	0.45	0.495	0.462	0.45	0.5	0.491	0.45	0.45	0.45	0.494	0.458	0.45	0.498	0.49	0.45	0.45	0.45	0.499	0.493	0.45	0.492	0.492	0.45	0.45	0.45	0.488	0.454	0.45	0.481	0.481	0.45	0.634	0.633	0.632	0.634	0.637	0.662	0.634	0.61
	500	0.5	0.5	0.543	0.507	0.5	0.535	0.534	0.5	0.5	0.5	0.547	0.558	0.5	0.545	0.535	0.5	0.5	0.5	0.546	0.57	0.5	0.536	0.535	0.5	0.5	0.5	0.545	0.525	0.5	0.548	0.536	0.5	0.5	0.5	0.535	0.512	0.5	0.533	0.528	0.5	0.637	0.635	0.649	0.637	0.639	0.676	0.637	0.621
300	50	0.069	0.088	0.076	0.056	0.097	0.059	0.062	0.085	0.07	0.089	0.075	0.081	0.098	0.061	0.068	0.078	0.064	0.087	0.077	0.075	0.064	0.06	0.064	0.076	0.069	0.09	0.074	0.079	0.099	0.061	0.066	0.083	0.073	0.083	0.065	0.06	0.087	0.061	0.053	0.077	0.566	0.563	0.565	0.566	0.566	0.101	0.565	0.106
	100	0.131	0.132	0.13	0.12	0.137	0.119	0.125	0.133	0.128	0.135	0.132	0.117	0.142	0.122	0.127	0.13	0.124	0.125	0.132	0.122	0.124	0.112	0.124	0.128	0.129	0.137	0.13	0.116	0.143	0.121	0.129	0.133	0.115	0.115	0.119	0.109	0.117	0.119	0.115	0.115	0.572	0.569	0.569	0.57	0.574	0.236	0.569	0.184
	150	0.15	0.15	0.183	0.164	0.15	0.178	0.182	0.15	0.152	0.152	0.184	0.183	0.152	0.171	0.185	0.152	0.15	0.15	0.184	0.159	0.15	0.177	0.18	0.15	0.153	0.153	0.184	0.17	0.153	0.176	0.186	0.153	0.15	0.15	0.172	0.175	0.15	0.169	0.172	0.15	0.577	0.576	0.576	0.577	0.581	0.484	0.577	0.247
	200	0.2	0.2	0.24	0.213	0.2	0.232	0.236	0.2	0.2	0.2	0.235	0.232	0.2	0.236	0.24	0.2	0.2	0.2	0.236	0.203	0.2	0.234	0.237	0.2	0.2	0.2	0.241	0.219	0.2	0.231	0.24	0.2	0.2	0.2	0.227	0.202	0.2	0.231	0.228	0.2	0.581	0.58	0.58	0.58	0.585	0.489	0.58	0.315
	250	0.25	0.25	0.292	0.271	0.25	0.284	0.281	0.25	0.25	0.25	0.29	0.261	0.25	0.281	0.283	0.25	0.25	0.25	0.289	0.251	0.25	0.282	0.281	0.25	0.25	0.25	0.293	0.254	0.25	0.282	0.285	0.25	0.25	0.25	0.28	0.258	0.25	0.275	0.275	0.25	0.581	0.582	0.583	0.582	0.589	0.6	0.581	0.368
	300	0.3	0.3	0.344	0.326	0.3	0.339	0.331	0.3	0.3	0.3	0.343	0.307	0.3	0.334	0.333	0.3	0.3	0.3	0.341	0.312	0.3	0.336	0.331	0.3	0.3	0.3	0.344	0.311	0.3	0.344	0.335	0.3	0.3	0.3	0.333	0.33	0.3	0.323	0.325	0.3	0.585	0.583	0.583	0.584	0.591	0.566	0.584	0.426
	350	0.35	0.35	0.393	0.378	0.35	0.388	0.383	0.35	0.35	0.35	0.391	0.372	0.35	0.388	0.386	0.35	0.35	0.35	0.391	0.352	0.35	0.385	0.384	0.35	0.35	0.35	0.393	0.353	0.35	0.395	0.386	0.35	0.35	0.35	0.383	0.369	0.35	0.378	0.379	0.35	0.588	0.587	0.587	0.587	0.593	0.529	0.587	0.466
	400	0.4	0.4	0.442	0.408	0.4	0.434	0.433	0.4	0.4	0.4	0.439	0.408	0.4	0.431	0.434	0.4	0.4	0.4	0.44	0.435	0.4	0.436	0.432	0.4	0.4	0.4	0.442	0.432	0.4	0.434	0.436	0.4	0.4	0.4	0.431	0.419	0.4	0.432	0.427	0.4	0.588	0.587	0.587	0.589	0.593	0.639	0.589	0.505
	450	0.45	0.45	0.487	0.459	0.45	0.48	0.479	0.45	0.45	0.45	0.485	0.488	0.45	0.483	0.479	0.45	0.45	0.45	0.486	0.452	0.45	0.476	0.478	0.45	0.45	0.45	0.487	0.462	0.45	0.489	0.482	0.45	0.45	0.45	0.478	0.457	0.45	0.479	0.474	0.45	0.592	0.59	0.599	0.589	0.597	0.65	0.589	0.532
	500	0.5	0.5	0.537	0.542	0.5	0.525	0.528	0.5	0.5	0.5	0.533	0.561	0.5	0.532	0.527	0.5	0.5	0.5	0.535	0.509	0.5	0.532	0.527	0.5	0.5	0.5	0.537	0.506	0.5	0.528	0.53	0.5	0.5	0.5	0.529	0.541	0.5	0.527	0.523	0.5	0.592	0.596	0.615	0.592	0.601	0.655	0.592	0.564
350	50	0.076	0.088	0.068	0.057	0.076	0.057	0.065	0.08	0.071	0.08	0.072	0.063	0.071	0.064	0.07	0.079	0.073	0.08	0.069	0.067	0.081	0.06	0.063	0.077	0.074	0.084	0.067	0.078	0.09	0.062	0.06	0.078	0.065	0.068	0.063	0.063	0.073	0.059	0.057	0.067	0.522	0.52	0.521	0.52	0.524	0.097	0.521	0.104
	100	0.116	0.115	0.123	0.109	0.116	0.116	0.122	0.116	0.113	0.115	0.124	0.113	0.113	0.116	0.125	0.115	0.103	0.103	0.12	0.108	0.103	0.114	0.118	0.103	0.108	0.108	0.121	0.103	0.11	0.114	0.117	0.108	0.1	0.1	0.113	0.104	0.1	0.109	0.111	0.1	0.529	0.528	0.528	0.529	0.533	0.44	0.527	0.173
	150	0.15	0.15	0.177	0.151	0.15	0.175	0.18	0.15	0.15	0.15	0.176	0.164	0.15	0.171	0.182	0.15	0.15	0.15	0.174	0.179	0.15	0.163	0.176	0.15	0.15	0.15	0.175	0.163	0.15	0.164	0.176	0.15	0.15	0.15	0.164	0.171	0.15	0.158	0.166	0.15	0.534	0.533	0.533	0.533	0.536	0.474	0.533	0.231
	200	0.2	0.2	0.234	0.202	0.2	0.227	0.227	0.2	0.2	0.2	0.229	0.207	0.2	0.231	0.228	0.2	0.2	0.2	0.226	0.215	0.2	0.228	0.225	0.2	0.2	0.2	0.232	0.208	0.2	0.222	0.223	0.2	0.2	0.2	0.218	0.215	0.2	0.218	0.216	0.2	0.535	0.536	0.537	0.535	0.537	0.308	0.535	0.302
	250	0.25	0.25	0.288	0.262	0.25	0.281	0.277	0.25	0.25	0.25	0.283	0.254	0.25	0.278	0.278	0.25	0.25	0.25	0.279	0.259	0.25	0.272	0.275	0.25	0.25	0.25	0.285	0.252	0.25	0.274	0.273	0.25	0.25	0.25	0.273	0.258	0.25	0.273	0.266	0.25	0.535	0.537	0.537	0.536	0.541	0.572	0.536	0.361
	300	0.3	0.3	0.338	0.314	0.3	0.332	0.33	0.3	0.3	0.3	0.332	0.314	0.3	0.332	0.331	0.3	0.3	0.3	0.329	0.314	0.3	0.326	0.329	0.3	0.3	0.3	0.335	0.306	0.3	0.325	0.327	0.3	0.3	0.3	0.322	0.302	0.3	0.318	0.32	0.3	0.542	0.541	0.541	0.54	0.543	0.565	0.539	0.407
	350	0.35	0.35	0.386	0.368	0.35	0.382	0.382	0.35	0.35	0.35	0.381	0.357	0.35	0.379	0.38	0.35	0.35	0.35	0.379	0.359	0.35	0.379	0.378	0.35	0.35	0.35	0.384	0.361	0.35	0.375	0.379	0.35	0.35	0.35	0.373	0.36	0.35	0.375	0.371	0.35	0.542	0.542	0.542	0.543	0.546	0.597	0.543	0.448
	400	0.4	0.4	0.432	0.407	0.4	0.427	0.429	0.4	0.4	0.4	0.428	0.405	0.4	0.431	0.424	0.4	0.4	0.4	0.424	0.406	0.4	0.432	0.424	0.4	0.4	0.4	0.429	0.406	0.4	0.433	0.427	0.4	0.4	0.4	0.418	0.404	0.4	0.421	0.417	0.4	0.546	0.542	0.55	0.543	0.547	0.523	0.543	0.476
	450	0.45	0.45	0.482	0.464	0.45	0.474	0.478	0.45	0.45	0.45	0.477	0.453	0.45	0.479	0.472	0.45	0.45	0.45	0.471	0.45	0.45	0.471	0.474	0.45	0.45	0.45	0.479	0.46	0.45	0.469	0.476	0.45	0.45	0.45	0.468	0.462	0.45	0.47	0.467	0.45	0.546	0.547	0.565	0.546	0.547	0.616	0.546	0.511
	500	0.5	0.5	0.522	0.505	0.5	0.525	0.52	0.5	0.5	0.5	0.517	0.522	0.5	0.517	0.519	0.5	0.5	0.5	0.515	0.527	0.5	0.519	0.521	0.5	0.5	0.5	0.52	0.506	0.5	0.519	0.519	0.5	0.5	0.5	0.513	0.524	0.5	0.514	0.514	0.5	0.546	0.551	0.585	0.546	0.547	0.609	0.547	0.535
400	50	0.074	0.075	0.065	0.062	0.074	0.058	0.06	0.074	0.067	0.07	0.066	0.053	0.067	0.059	0.062	0.069	0.067	0.07	0.066	0.053	0.067	0.054	0.06	0.069	0.072	0.075	0.065	0.053	0.072	0.06	0.06	0.074	0.059	0.061	0.061	0.052	0.059	0.052	0.054	0.059	0.481	0.48	0.481	0.481	0.482	0.161	0.481	0.082
	100	0.1	0.1	0.118	0.115	0.1	0.113	0.119	0.1	0.1	0.1	0.116	0.113	0.1	0.121	0.121	0.1	0.1	0.1	0.116	0.101	0.1	0.107	0.119	0.1	0.1	0.1	0.118	0.106	0.1	0.113	0.12	0.1	0.1	0.1	0.11	0.101	0.1	0.112	0.109	0.1	0.489	0.489	0.489	0.488	0.491	0.424	0.486	0.143
	150	0.15	0.15	0.171	0.155	0.15	0.16	0.168	0.15	0.15	0.15	0.169	0.16	0.15	0.163	0.173	0.15	0.15	0.15	0.169	0.167	0.15	0.165	0.171	0.15	0.15	0.15	0.172	0.177	0.15	0.166	0.169	0.15	0.15	0.15	0.164	0.155	0.15	0.163	0.16	0.15	0.491	0.49	0.491	0.491	0.492	0.449	0.491	0.209
	200	0.2	0.2	0.224	0.201	0.2	0.216	0.218	0.2	0.2	0.2	0.221	0.228	0.2	0.22	0.222	0.2	0.2	0.2	0.221	0.207	0.2	0.22	0.221	0.2	0.2	0.2	0.224	0.2	0.2	0.22	0.219	0.2	0.2	0.2	0.216	0.205	0.2	0.221	0.21	0.2	0.491	0.492	0.492	0.492	0.497	0.433	0.491	0.272
	250	0.25	0.25	0.278	0.257	0.25	0.278	0.272	0.25	0.25	0.25	0.275	0.266	0.25	0.269	0.276	0.25	0.25	0.25	0.275	0.262	0.25	0.271	0.275	0.25	0.25	0.25	0.278	0.253	0.25	0.277	0.273	0.25	0.25	0.25	0.268	0.259	0.25	0.27	0.264	0.25	0.495	0.496	0.495	0.494	0.5	0.521	0.494	0.335
	300	0.3	0.3	0.328	0.303	0.3	0.326	0.324	0.3	0.3	0.3	0.325	0.314	0.3	0.324	0.326	0.3	0.3	0.3	0.325	0.303	0.3	0.319	0.325	0.3	0.3	0.3	0.327	0.305	0.3	0.33	0.325	0.3	0.3	0.3	0.318	0.303	0.3	0.317	0.316	0.3	0.498	0.497	0.497	0.497	0.503	0.513	0.497	0.388
	350	0.35	0.35	0.375	0.383	0.35	0.377	0.373	0.35	0.35	0.35	0.37	0.354	0.35	0.371	0.372	0.35	0.35	0.35	0.37	0.355	0.35	0.37	0.371	0.35	0.35	0.35	0.375	0.376	0.35	0.374	0.374	0.35	0.35	0.35	0.366	0.359	0.35	0.366	0.363	0.35	0.498	0.498	0.505	0.499	0.503	0.558	0.499	0.431
	400	0.4	0.4	0.424	0.421	0.4	0.419	0.422	0.4	0.4	0.4	0.419	0.401	0.4	0.414	0.421	0.4	0.4	0.4	0.418	0.404	0.4	0.421	0.42	0.4	0.4	0.4	0.423	0.407	0.4	0.421	0.423	0.4	0.4	0.4	0.414	0.4	0.4	0.418	0.413	0.4	0.501	0.503	0.519	0.501	0.509	0.546	0.501	0.481
	450	0.45	0.45	0.468	0.457	0.45	0.466	0.467	0.45	0.45	0.45	0.464	0.453	0.45	0.466	0.468	0.45	0.45	0.45	0.463	0.453	0.45	0.463	0.467	0.45	0.45	0.45	0.467	0.453	0.45	0.472	0.468	0.45	0.45	0.45	0.459	0.452	0.45	0.467	0.46	0.45	0.501	0.507	0.537	0.501	0.509	0.578	0.501	0.495
	500	0.5	0.5	0.514	0.503	0.5	0.512	0.5	0.5	0.5	0.5	0.514	0.502	0.5	0.513	0.5	0.5	0.5	0.5	0.513	0.509	0.5	0.512	0.5	0.5	0.5	0.5	0.513	0.507	0.5	0.51	0.5	0.5	0.5	0.5	0.507	0.502	0.5	0.507	0.5	0.5	0.503	0.509	0.563	0.503	0.509	0.579	0.518	0.503
450	50	0.064	0.064	0.061	0.052	0.064	0.059	0.057	0.064	0.061	0.061	0.058	0.056	0.061	0.055	0.057	0.061	0.053	0.053	0.058	0.056	0.053	0.057	0.054	0.053	0.066	0.069	0.065	0.066	0.066	0.056	0.063	0.066	0.05	0.05	0.057	0.051	0.05	0.052	0.05	0.05	0.44	0.437	0.438	0.439	0.442	0.084	0.439	0.081
	100	0.1	0.1	0.115	0.122	0.1	0.113	0.11	0.1	0.1	0.1	0.112	0.106	0.1	0.111	0.114	0.1	0.1	0.1	0.111	0.119	0.1	0.108	0.109	0.1	0.1	0.1	0.117	0.103	0.1	0.116	0.114	0.1	0.1	0.1	0.108	0.102	0.1	0.107	0.103	0.1	0.447	0.444	0.444	0.446	0.447	0.156	0.446	0.141
	150	0.15	0.15	0.171	0.153	0.15	0.165	0.16	0.15	0.15	0.15	0.165	0.162	0.15	0.161	0.164	0.15	0.15	0.15	0.164	0.151	0.15	0.164	0.161	0.15	0.15	0.15	0.17	0.153	0.15	0.162	0.164	0.15	0.15	0.15	0.161	0.155	0.15	0.159	0.155	0.15	0.447	0.447	0.448	0.447	0.448	0.26	0.447	0.202
	200	0.2	0.2	0.222	0.203	0.2	0.213	0.214	0.2	0.2	0.2	0.219	0.204	0.2	0.217	0.217	0.2	0.2	0.2	0.216	0.201	0.2	0.215	0.214	0.2	0.2	0.2	0.221	0.202	0.2	0.215	0.219	0.2	0.2	0.2	0.212	0.212	0.2	0.21	0.205	0.2	0.447	0.448	0.448	0.448	0.453	0.463	0.447	0.267
	250	0.25	0.25	0.271	0.253	0.25	0.263	0.266	0.25	0.25	0.25	0.27	0.251	0.25	0.268	0.267	0.25	0.25	0.25	0.265	0.252	0.25	0.263	0.268	0.25	0.25	0.25	0.272	0.25	0.25	0.27	0.27	0.25	0.25	0.25	0.261	0.251	0.25	0.26	0.259	0.25	0.454	0.453	0.453	0.452	0.453	0.449	0.45	0.315
	300	0.3	0.3	0.319	0.301	0.3	0.321	0.315	0.3	0.3	0.3	0.32	0.307	0.3	0.317	0.316	0.3	0.3	0.3	0.316	0.301	0.3	0.312	0.317	0.3	0.3	0.3	0.321	0.302	0.3	0.321	0.319	0.3	0.3	0.3	0.31	0.301	0.3	0.307	0.307	0.3	0.454	0.454	0.453	0.455	0.456	0.459	0.455	0.373
	350	0.35	0.35	0.367	0.354	0.35	0.367	0.366	0.35	0.35	0.35	0.368	0.371	0.35	0.36	0.367	0.35	0.35	0.35	0.364	0.351	0.35	0.363	0.367	0.35	0.35	0.35	0.37	0.352	0.35	0.366	0.369	0.35	0.35	0.35	0.36	0.351	0.35	0.355	0.36	0.35	0.456	0.458	0.472	0.456	0.458	0.509	0.455	0.418
	400	0.4	0.4	0.415	0.4	0.4	0.415	0.412	0.4	0.4	0.4	0.414	0.408	0.4	0.417	0.414	0.4	0.4	0.4	0.412	0.402	0.4	0.411	0.414	0.4	0.4	0.4	0.417	0.404	0.4	0.415	0.415	0.4	0.4	0.4	0.408	0.4	0.4	0.404	0.407	0.4	0.456	0.462	0.491	0.456	0.458	0.522	0.456	0.448
	450	0.45	0.45	0.462	0.452	0.45	0.461	0.45	0.45	0.45	0.45	0.46	0.465	0.45	0.459	0.45	0.45	0.45	0.45	0.458	0.46	0.45	0.463	0.45	0.45	0.45	0.45	0.462	0.471	0.45	0.463	0.45	0.45	0.45	0.45	0.456	0.455	0.45	0.458	0.45	0.45	0.457	0.464	0.513	0.457	0.464	0.536	0.472	0.458
	500	0.5	0.5	0.507	0.511	0.5	0.503	0.5	0.5	0.5	0.5	0.506	0.515	0.5	0.506	0.5	0.5	0.5	0.5	0.506	0.506	0.5	0.507	0.5	0.5	0.5	0.5	0.508	0.501	0.5	0.504	0.5	0.5	0.5	0.5	0.503	0.501	0.5	0.502	0.5	0.5	0.5	0.5	0.535	0.501	0.5	0.543	0.5	0.5
500	50	0.05	0.05	0.059	0.063	0.05	0.055	0.052	0.05	0.05	0.05	0.057	0.05	0.05	0.055	0.059	0.05	0.05	0.05	0.058	0.05	0.05	0.051	0.055	0.05	0.054	0.054	0.059	0.05	0.056	0.057	0.057	0.054	0.05	0.05	0.054	0.052	0.05	0.055	0.05	0.05	0.398	0.396	0.397	0.396	0.399	0.134	0.396	0.075
	100	0.1	0.1	0.113	0.101	0.1	0.108	0.102	0.1	0.1	0.1	0.108	0.102	0.1	0.107	0.11	0.1	0.1	0.1	0.11	0.1	0.1	0.106	0.109	0.1	0.1	0.1	0.113	0.102	0.1	0.109	0.107	0.1	0.1	0.1	0.106	0.104	0.1	0.106	0.104	0.1	0.402	0.401	0.401	0.402	0.403	0.31	0.402	0.132
	150	0.15	0.15	0.166	0.153	0.15	0.162	0.157	0.15	0.15	0.15	0.163	0.151	0.15	0.159	0.16	0.15	0.15	0.15	0.162	0.151	0.15	0.162	0.159	0.15	0.15	0.15	0.166	0.151	0.15	0.16	0.161	0.15	0.15	0.15	0.157	0.151	0.15	0.155	0.154	0.15	0.402	0.403	0.403	0.402	0.407	0.345	0.402	0.191
	200	0.2	0.2	0.214	0.205	0.2	0.209	0.211	0.2	0.2	0.2	0.215	0.203	0.2	0.215	0.213	0.2	0.2	0.2	0.213	0.203	0.2	0.211	0.214	0.2	0.2	0.2	0.217	0.202	0.2	0.212	0.213	0.2	0.2	0.2	0.208	0.2	0.2	0.209	0.207	0.2	0.404	0.407	0.406	0.403	0.41	0.391	0.404	0.256
	250	0.25	0.25	0.261	0.257	0.25	0.261	0.26	0.25	0.25	0.25	0.266	0.254	0.25	0.256	0.262	0.25	0.25	0.25	0.264	0.252	0.25	0.258	0.264	0.25	0.25	0.25	0.265	0.265	0.25	0.265	0.263	0.25	0.25	0.25	0.258	0.25	0.25	0.258	0.257	0.25	0.409	0.408	0.407	0.41	0.413	0.443	0.408	0.311
	300	0.3	0.3	0.31	0.304	0.3	0.316	0.311	0.3	0.3	0.3	0.315	0.305	0.3	0.312	0.312	0.3	0.3	0.3	0.311	0.301	0.3	0.309	0.315	0.3	0.3	0.3	0.313	0.312	0.3	0.315	0.314	0.3	0.3	0.3	0.308	0.302	0.3	0.305	0.308	0.3	0.41	0.411	0.422	0.41	0.419	0.445	0.41	0.359
	350	0.35	0.35	0.36	0.355	0.35	0.359	0.359	0.35	0.35	0.35	0.362	0.352	0.35	0.357	0.36	0.35	0.35	0.35	0.358	0.351	0.35	0.357	0.363	0.35	0.35	0.35	0.362	0.352	0.35	0.36	0.36	0.35	0.35	0.35	0.356	0.351	0.35	0.359	0.355	0.35	0.411	0.415	0.445	0.411	0.419	0.472	0.411	0.4
	400	0.4	0.4	0.408	0.4	0.4	0.407	0.4	0.4	0.4	0.4	0.408	0.401	0.4	0.406	0.4	0.4	0.4	0.4	0.406	0.4	0.4	0.407	0.4	0.4	0.4	0.4	0.409	0.404	0.4	0.411	0.4	0.4	0.4	0.4	0.406	0.4	0.4	0.406	0.4	0.4	0.412	0.419	0.464	0.412	0.419	0.484	0.421	0.412
	450	0.45	0.45	0.455	0.452	0.45	0.453	0.45	0.45	0.45	0.45	0.455	0.453	0.45	0.454	0.45	0.45	0.45	0.45	0.454	0.452	0.45	0.452	0.45	0.45	0.45	0.45	0.456	0.456	0.45	0.455	0.45	0.45	0.45	0.45	0.454	0.45	0.45	0.452	0.45	0.45	0.45	0.45	0.485	0.452	0.45	0.49	0.45	0.45
	500	0.5	0.5	0.5	0.5	0.5	0.5	0.5	0.5	0.5	0.5	0.5	0.5	0.5	0.5	0.5	0.5	0.5	0.5	0.5	0.5	0.5	0.5	0.5	0.5	0.5	0.5	0.5	0.5	0.5	0.5	0.5	0.5	0.5	0.5	0.5	0.5	0.5	0.5	0.5	0.5	0.5	0.5	0.5	0.5	0.5	0.5	0.5	0.5
[truncated: 17 more columns]

## Sheet: 2.1
kb	ks	CC-CC	CC-H_index	CC-K_shell	CC-EC	CC-LR	CC-R	CC-LC	CC-ECC	H_index-CC	H_index-H_index	H_index-K_shell	H_index-EC	H_index-LR	H_index-R	H_index-LC	H_index-ECC	K_shell-CC	K_shell-H_index	K_shell-K_shell	K_shell-EC	K_shell-LR	K_shell-R	K_shell-LC	K_shell-ECC	EC-CC	EC-H_index	EC-K_shell	EC-EC	EC-LR	EC-R	EC-LC	EC-ECC	LR-CC	LR-H_index	LR-K_shell	LR-EC	LR-LR	LR-R	LR-LC	LR-ECC	R-CC	R-H_index	R-K_shell	R-EC	R-LR	R-R	R-LC	R-ECC
50	50	0.161	0.185	0.183	0.128	0.245	0.094	0.22	0.08	0.15	0.188	0.186	0.136	0.244	0.112	0.21	0.073	0.185	0.199	0.208	0.178	0.246	0.107	0.227	0.077	0.153	0.184	0.193	0.141	0.243	0.098	0.214	0.074	0.144	0.164	0.175	0.119	0.208	0.107	0.187	0.073	0.681	0.677	0.677	0.679	0.685	0.152	0.678	0.1
	100	0.227	0.276	0.281	0.203	0.353	0.2	0.308	0.151	0.233	0.28	0.283	0.213	0.349	0.199	0.3	0.15	0.25	0.297	0.291	0.246	0.329	0.217	0.312	0.149	0.227	0.271	0.277	0.216	0.35	0.196	0.304	0.147	0.203	0.249	0.246	0.188	0.308	0.19	0.281	0.133	0.722	0.715	0.717	0.72	0.724	0.27	0.719	0.197
	150	0.268	0.334	0.326	0.26	0.417	0.285	0.382	0.209	0.275	0.333	0.317	0.278	0.418	0.29	0.375	0.206	0.29	0.342	0.33	0.287	0.401	0.293	0.384	0.223	0.285	0.332	0.319	0.29	0.415	0.282	0.378	0.214	0.251	0.312	0.292	0.231	0.374	0.279	0.36	0.201	0.732	0.73	0.73	0.733	0.737	0.418	0.732	0.284
	200	0.305	0.369	0.345	0.309	0.489	0.378	0.449	0.278	0.316	0.372	0.337	0.327	0.487	0.357	0.443	0.273	0.321	0.384	0.351	0.327	0.413	0.356	0.448	0.273	0.315	0.367	0.346	0.333	0.485	0.367	0.444	0.274	0.292	0.353	0.34	0.277	0.395	0.364	0.431	0.257	0.744	0.737	0.737	0.744	0.748	0.457	0.741	0.366
	250	0.341	0.409	0.423	0.337	0.503	0.436	0.489	0.321	0.356	0.406	0.417	0.353	0.503	0.427	0.483	0.322	0.362	0.416	0.425	0.357	0.438	0.432	0.49	0.328	0.361	0.411	0.43	0.359	0.5	0.433	0.486	0.322	0.317	0.41	0.434	0.311	0.441	0.422	0.475	0.315	0.752	0.747	0.743	0.751	0.755	0.517	0.752	0.461
	300	0.375	0.457	0.5	0.366	0.508	0.478	0.525	0.367	0.377	0.453	0.495	0.385	0.506	0.496	0.522	0.375	0.395	0.462	0.504	0.392	0.487	0.501	0.527	0.373	0.381	0.453	0.501	0.383	0.504	0.507	0.525	0.369	0.35	0.454	0.5	0.348	0.493	0.491	0.515	0.359	0.756	0.753	0.751	0.755	0.765	0.638	0.757	0.531
	350	0.394	0.495	0.54	0.396	0.555	0.556	0.563	0.396	0.395	0.494	0.536	0.398	0.552	0.543	0.561	0.406	0.406	0.5	0.545	0.406	0.516	0.547	0.565	0.411	0.396	0.496	0.539	0.403	0.556	0.543	0.564	0.4	0.376	0.494	0.537	0.38	0.493	0.543	0.553	0.384	0.765	0.757	0.757	0.762	0.769	0.646	0.762	0.577
	400	0.423	0.53	0.575	0.419	0.573	0.599	0.612	0.428	0.426	0.529	0.572	0.425	0.57	0.597	0.61	0.432	0.424	0.533	0.58	0.424	0.516	0.611	0.614	0.438	0.425	0.531	0.575	0.425	0.572	0.595	0.613	0.427	0.407	0.525	0.573	0.406	0.493	0.578	0.602	0.408	0.765	0.763	0.765	0.772	0.778	0.716	0.767	0.622
	450	0.46	0.542	0.609	0.461	0.573	0.647	0.64	0.462	0.461	0.539	0.609	0.46	0.57	0.654	0.638	0.46	0.45	0.544	0.614	0.45	0.516	0.637	0.642	0.45	0.458	0.542	0.608	0.462	0.572	0.657	0.64	0.461	0.49	0.541	0.613	0.466	0.493	0.64	0.631	0.469	0.775	0.768	0.768	0.774	0.78	0.693	0.775	0.652
	500	0.509	0.563	0.649	0.524	0.573	0.7	0.678	0.509	0.506	0.56	0.651	0.541	0.57	0.684	0.677	0.512	0.516	0.563	0.653	0.517	0.516	0.684	0.681	0.513	0.504	0.562	0.65	0.539	0.572	0.7	0.679	0.51	0.507	0.557	0.651	0.523	0.515	0.672	0.67	0.515	0.779	0.775	0.775	0.779	0.785	0.741	0.779	0.691
100	50	0.088	0.141	0.107	0.074	0.169	0.083	0.138	0.061	0.085	0.134	0.102	0.074	0.16	0.083	0.13	0.059	0.093	0.136	0.105	0.083	0.164	0.083	0.132	0.067	0.085	0.146	0.11	0.079	0.168	0.092	0.137	0.062	0.059	0.126	0.103	0.061	0.168	0.086	0.112	0.058	0.641	0.641	0.64	0.64	0.644	0.173	0.639	0.102
	100	0.125	0.212	0.206	0.118	0.244	0.165	0.225	0.113	0.134	0.201	0.209	0.121	0.237	0.173	0.221	0.115	0.134	0.203	0.205	0.127	0.239	0.163	0.224	0.116	0.141	0.216	0.224	0.122	0.247	0.164	0.23	0.116	0.133	0.204	0.218	0.11	0.285	0.172	0.204	0.104	0.68	0.675	0.673	0.678	0.684	0.31	0.68	0.196
	150	0.165	0.287	0.305	0.161	0.305	0.255	0.306	0.158	0.167	0.28	0.304	0.167	0.299	0.243	0.304	0.165	0.161	0.277	0.304	0.154	0.302	0.253	0.307	0.163	0.169	0.291	0.317	0.172	0.314	0.246	0.313	0.163	0.2	0.268	0.309	0.166	0.349	0.237	0.287	0.166	0.69	0.688	0.689	0.692	0.699	0.464	0.691	0.278
	200	0.207	0.339	0.383	0.205	0.382	0.31	0.367	0.207	0.206	0.327	0.386	0.207	0.384	0.335	0.364	0.203	0.208	0.326	0.387	0.204	0.386	0.307	0.368	0.202	0.207	0.336	0.394	0.206	0.389	0.31	0.371	0.206	0.24	0.326	0.375	0.221	0.384	0.313	0.349	0.227	0.703	0.697	0.696	0.704	0.708	0.429	0.703	0.367
	250	0.274	0.386	0.428	0.265	0.382	0.395	0.414	0.261	0.275	0.382	0.429	0.27	0.384	0.389	0.415	0.265	0.272	0.38	0.43	0.266	0.386	0.383	0.418	0.267	0.281	0.387	0.438	0.275	0.389	0.383	0.42	0.268	0.324	0.377	0.415	0.263	0.442	0.371	0.401	0.289	0.709	0.707	0.705	0.708	0.716	0.513	0.711	0.453
	300	0.34	0.424	0.469	0.331	0.382	0.448	0.462	0.328	0.357	0.419	0.469	0.33	0.384	0.449	0.462	0.335	0.353	0.414	0.47	0.343	0.386	0.447	0.464	0.335	0.347	0.422	0.477	0.324	0.389	0.437	0.467	0.328	0.354	0.403	0.461	0.329	0.45	0.433	0.451	0.333	0.715	0.711	0.71	0.712	0.721	0.68	0.716	0.499
	350	0.382	0.441	0.511	0.382	0.382	0.515	0.511	0.373	0.384	0.442	0.507	0.384	0.384	0.511	0.513	0.376	0.386	0.44	0.507	0.399	0.386	0.5	0.514	0.376	0.389	0.445	0.513	0.371	0.389	0.491	0.516	0.377	0.354	0.431	0.5	0.419	0.45	0.485	0.502	0.376	0.72	0.717	0.716	0.721	0.727	0.618	0.722	0.558
	400	0.41	0.462	0.552	0.446	0.416	0.556	0.546	0.424	0.41	0.457	0.548	0.429	0.42	0.559	0.548	0.432	0.408	0.46	0.547	0.47	0.418	0.544	0.549	0.428	0.409	0.465	0.554	0.45	0.417	0.563	0.549	0.429	0.42	0.444	0.542	0.433	0.45	0.531	0.539	0.43	0.723	0.719	0.72	0.727	0.731	0.669	0.722	0.596
	450	0.468	0.469	0.599	0.466	0.47	0.593	0.589	0.47	0.466	0.466	0.595	0.495	0.466	0.6	0.591	0.466	0.468	0.468	0.593	0.494	0.468	0.604	0.592	0.468	0.467	0.471	0.597	0.481	0.473	0.602	0.592	0.473	0.45	0.45	0.586	0.465	0.45	0.579	0.583	0.45	0.732	0.725	0.724	0.73	0.737	0.753	0.73	0.632
	500	0.5	0.5	0.636	0.535	0.5	0.647	0.628	0.5	0.5	0.5	0.634	0.533	0.5	0.642	0.63	0.5	0.5	0.5	0.632	0.531	0.5	0.639	0.631	0.5	0.5	0.5	0.635	0.566	0.5	0.63	0.631	0.5	0.5	0.5	0.623	0.558	0.5	0.638	0.622	0.5	0.732	0.732	0.732	0.732	0.739	0.738	0.732	0.667
150	50	0.059	0.117	0.125	0.058	0.166	0.076	0.104	0.062	0.059	0.112	0.12	0.053	0.128	0.072	0.107	0.06	0.06	0.116	0.126	0.057	0.132	0.086	0.107	0.058	0.057	0.113	0.121	0.058	0.163	0.087	0.107	0.062	0.075	0.111	0.125	0.055	0.153	0.078	0.091	0.065	0.594	0.589	0.587	0.586	0.593	0.403	0.587	0.096
	100	0.126	0.204	0.228	0.122	0.276	0.168	0.196	0.104	0.143	0.19	0.222	0.137	0.205	0.16	0.2	0.113	0.147	0.192	0.225	0.128	0.209	0.162	0.202	0.116	0.13	0.201	0.225	0.132	0.273	0.164	0.199	0.105	0.143	0.179	0.222	0.12	0.231	0.141	0.178	0.129	0.618	0.614	0.615	0.614	0.629	0.245	0.622	0.196
	150	0.185	0.26	0.308	0.192	0.318	0.239	0.271	0.177	0.197	0.256	0.299	0.195	0.282	0.223	0.272	0.181	0.186	0.258	0.302	0.183	0.287	0.221	0.272	0.183	0.18	0.253	0.306	0.177	0.319	0.235	0.272	0.175	0.232	0.247	0.277	0.175	0.302	0.217	0.245	0.192	0.634	0.63	0.632	0.631	0.641	0.526	0.635	0.279
	200	0.261	0.318	0.359	0.232	0.374	0.293	0.327	0.237	0.282	0.309	0.344	0.239	0.282	0.298	0.327	0.241	0.278	0.314	0.348	0.258	0.287	0.289	0.327	0.237	0.265	0.316	0.358	0.265	0.379	0.3	0.328	0.236	0.232	0.294	0.319	0.214	0.35	0.287	0.301	0.229	0.646	0.645	0.639	0.644	0.657	0.424	0.646	0.355
	250	0.294	0.347	0.401	0.319	0.39	0.346	0.382	0.279	0.282	0.346	0.387	0.296	0.282	0.352	0.381	0.278	0.287	0.345	0.389	0.275	0.287	0.347	0.38	0.279	0.289	0.35	0.4	0.296	0.395	0.358	0.382	0.28	0.264	0.33	0.365	0.324	0.358	0.336	0.36	0.288	0.659	0.653	0.65	0.654	0.675	0.553	0.652	0.428
	300	0.306	0.374	0.44	0.347	0.39	0.409	0.432	0.33	0.314	0.374	0.432	0.365	0.316	0.406	0.431	0.338	0.311	0.374	0.433	0.348	0.315	0.417	0.432	0.333	0.309	0.373	0.441	0.338	0.395	0.419	0.433	0.337	0.328	0.35	0.412	0.342	0.358	0.41	0.41	0.34	0.666	0.66	0.658	0.664	0.681	0.598	0.661	0.485
	350	0.368	0.387	0.484	0.366	0.39	0.472	0.472	0.378	0.372	0.389	0.478	0.434	0.378	0.47	0.475	0.38	0.371	0.388	0.481	0.407	0.377	0.471	0.475	0.379	0.375	0.392	0.483	0.371	0.395	0.458	0.475	0.383	0.358	0.358	0.457	0.392	0.358	0.455	0.458	0.358	0.666	0.668	0.664	0.67	0.692	0.676	0.668	0.532
	400	0.4	0.4	0.528	0.428	0.4	0.515	0.515	0.4	0.4	0.4	0.525	0.433	0.4	0.521	0.518	0.4	0.4	0.4	0.526	0.409	0.4	0.527	0.518	0.4	0.4	0.4	0.526	0.45	0.4	0.526	0.518	0.4	0.4	0.4	0.507	0.474	0.4	0.498	0.503	0.4	0.675	0.675	0.672	0.673	0.694	0.724	0.673	0.577
	450	0.45	0.45	0.563	0.524	0.45	0.563	0.558	0.45	0.45	0.45	0.564	0.519	0.45	0.562	0.56	0.45	0.45	0.45	0.565	0.541	0.45	0.571	0.56	0.45	0.45	0.45	0.563	0.517	0.45	0.555	0.56	0.45	0.45	0.45	0.542	0.461	0.45	0.547	0.546	0.45	0.678	0.681	0.685	0.678	0.694	0.67	0.678	0.607
	500	0.5	0.5	0.604	0.563	0.5	0.608	0.596	0.5	0.5	0.5	0.602	0.562	0.5	0.616	0.599	0.5	0.5	0.5	0.604	0.536	0.5	0.603	0.598	0.5	0.5	0.5	0.605	0.551	0.5	0.605	0.595	0.5	0.5	0.5	0.588	0.546	0.5	0.595	0.59	0.5	0.68	0.687	0.704	0.68	0.698	0.762	0.69	0.628
200	50	0.082	0.104	0.117	0.063	0.123	0.075	0.098	0.055	0.068	0.107	0.126	0.063	0.115	0.071	0.099	0.074	0.071	0.111	0.131	0.065	0.118	0.074	0.097	0.071	0.087	0.106	0.123	0.066	0.162	0.075	0.092	0.061	0.118	0.09	0.119	0.052	0.118	0.067	0.085	0.081	0.554	0.55	0.549	0.55	0.556	0.108	0.551	0.094
	100	0.134	0.175	0.217	0.135	0.216	0.156	0.183	0.116	0.175	0.175	0.213	0.115	0.199	0.137	0.176	0.14	0.156	0.177	0.209	0.108	0.192	0.154	0.175	0.139	0.123	0.173	0.214	0.111	0.219	0.139	0.177	0.12	0.118	0.167	0.169	0.146	0.118	0.129	0.15	0.128	0.574	0.572	0.571	0.571	0.583	0.246	0.58	0.196
	150	0.21	0.244	0.269	0.181	0.216	0.223	0.245	0.179	0.199	0.239	0.259	0.213	0.199	0.207	0.242	0.185	0.192	0.241	0.257	0.183	0.192	0.205	0.24	0.181	0.209	0.244	0.27	0.207	0.289	0.214	0.242	0.177	0.17	0.222	0.221	0.158	0.17	0.2	0.207	0.196	0.59	0.586	0.586	0.591	0.6	0.441	0.592	0.273
	200	0.216	0.282	0.317	0.237	0.216	0.278	0.304	0.222	0.201	0.279	0.305	0.232	0.205	0.278	0.29	0.237	0.206	0.277	0.302	0.239	0.21	0.288	0.289	0.232	0.209	0.281	0.318	0.223	0.321	0.28	0.302	0.231	0.234	0.248	0.272	0.211	0.234	0.261	0.263	0.242	0.601	0.597	0.596	0.599	0.615	0.492	0.603	0.36
	250	0.266	0.307	0.363	0.281	0.268	0.351	0.355	0.284	0.271	0.304	0.356	0.27	0.275	0.337	0.351	0.289	0.276	0.303	0.352	0.266	0.28	0.341	0.351	0.286	0.269	0.309	0.361	0.292	0.321	0.336	0.354	0.287	0.262	0.262	0.322	0.266	0.262	0.311	0.324	0.262	0.615	0.606	0.606	0.612	0.626	0.558	0.608	0.421
	300	0.324	0.323	0.407	0.34	0.324	0.39	0.398	0.324	0.317	0.316	0.402	0.333	0.317	0.404	0.406	0.317	0.312	0.312	0.4	0.341	0.312	0.387	0.408	0.312	0.319	0.318	0.408	0.31	0.321	0.393	0.398	0.319	0.3	0.3	0.375	0.312	0.3	0.369	0.381	0.3	0.619	0.617	0.615	0.62	0.638	0.523	0.618	0.467
	350	0.35	0.35	0.452	0.422	0.35	0.449	0.445	0.35	0.35	0.35	0.449	0.393	0.35	0.433	0.452	0.35	0.35	0.35	0.449	0.369	0.35	0.436	0.453	0.35	0.35	0.35	0.456	0.4	0.35	0.448	0.443	0.35	0.35	0.35	0.425	0.397	0.35	0.417	0.428	0.35	0.622	0.624	0.621	0.623	0.641	0.612	0.621	0.515
	400	0.4	0.4	0.496	0.432	0.4	0.487	0.49	0.4	0.4	0.4	0.486	0.44	0.4	0.499	0.496	0.4	0.4	0.4	0.488	0.409	0.4	0.49	0.497	0.4	0.4	0.4	0.498	0.433	0.4	0.488	0.489	0.4	0.4	0.4	0.469	0.43	0.4	0.461	0.473	0.4	0.63	0.63	0.628	0.63	0.644	0.69	0.627	0.55
	450	0.45	0.45	0.539	0.484	0.45	0.539	0.533	0.45	0.45	0.45	0.533	0.472	0.45	0.545	0.538	0.45	0.45	0.45	0.536	0.506	0.45	0.53	0.539	0.45	0.45	0.45	0.541	0.47	0.45	0.537	0.531	0.45	0.45	0.45	0.518	0.531	0.45	0.512	0.519	0.45	0.63	0.637	0.647	0.631	0.648	0.626	0.631	0.58
	500	0.5	0.5	0.573	0.518	0.5	0.587	0.571	0.5	0.5	0.5	0.573	0.53	0.5	0.581	0.576	0.5	0.5	0.5	0.575	0.521	0.5	0.58	0.578	0.5	0.5	0.5	0.578	0.533	0.5	0.58	0.568	0.5	0.5	0.5	0.559	0.507	0.5	0.57	0.559	0.5	0.634	0.642	0.666	0.634	0.65	0.719	0.643	0.598
250	50	0.073	0.102	0.12	0.059	0.101	0.066	0.088	0.058	0.103	0.093	0.123	0.071	0.13	0.068	0.084	0.077	0.08	0.099	0.129	0.056	0.135	0.076	0.085	0.074	0.08	0.102	0.121	0.056	0.106	0.079	0.092	0.061	0.063	0.085	0.089	0.062	0.103	0.066	0.062	0.063	0.514	0.512	0.513	0.51	0.519	0.138	0.511	0.095
	100	0.149	0.164	0.185	0.113	0.149	0.136	0.156	0.116	0.13	0.169	0.176	0.118	0.2	0.138	0.156	0.126	0.14	0.171	0.183	0.115	0.206	0.143	0.157	0.128	0.145	0.164	0.19	0.114	0.16	0.15	0.16	0.116	0.121	0.153	0.141	0.101	0.167	0.117	0.127	0.137	0.531	0.532	0.532	0.53	0.54	0.246	0.537	0.19
	150	0.151	0.216	0.236	0.161	0.151	0.213	0.22	0.177	0.164	0.214	0.226	0.176	0.252	0.199	0.215	0.182	0.158	0.216	0.232	0.177	0.256	0.203	0.216	0.184	0.16	0.222	0.239	0.167	0.16	0.206	0.225	0.176	0.179	0.186	0.195	0.161	0.193	0.186	0.183	0.183	0.545	0.542	0.543	0.544	0.551	0.31	0.546	0.265
	200	0.225	0.247	0.289	0.23	0.225	0.266	0.274	0.233	0.226	0.248	0.273	0.224	0.256	0.261	0.277	0.236	0.224	0.248	0.279	0.209	0.26	0.263	0.279	0.234	0.218	0.25	0.291	0.245	0.22	0.266	0.279	0.232	0.2	0.2	0.246	0.211	0.2	0.243	0.248	0.2	0.556	0.553	0.551	0.553	0.568	0.496	0.554	0.341
	250	0.257	0.261	0.337	0.272	0.257	0.326	0.323	0.257	0.256	0.256	0.325	0.264	0.256	0.307	0.335	0.256	0.26	0.26	0.328	0.273	0.26	0.325	0.339	0.26	0.264	0.264	0.336	0.278	0.264	0.323	0.328	0.264	0.25	0.25	0.299	0.273	0.25	0.298	0.307	0.25	0.565	0.561	0.561	0.563	0.574	0.419	0.561	0.397
	300	0.3	0.3	0.382	0.311	0.3	0.385	0.371	0.3	0.3	0.3	0.378	0.306	0.3	0.365	0.38	0.3	0.3	0.3	0.381	0.303	0.3	0.377	0.384	0.3	0.3	0.3	0.382	0.356	0.3	0.377	0.376	0.3	0.3	0.3	0.35	0.326	0.3	0.346	0.355	0.3	0.565	0.571	0.569	0.571	0.583	0.595	0.567	0.448
	350	0.35	0.35	0.429	0.379	0.35	0.415	0.419	0.35	0.35	0.35	0.425	0.382	0.35	0.417	0.427	0.35	0.35	0.35	0.427	0.361	0.35	0.426	0.43	0.35	0.35	0.35	0.431	0.369	0.35	0.435	0.423	0.35	0.35	0.35	0.399	0.354	0.35	0.406	0.406	0.35	0.572	0.574	0.572	0.572	0.588	0.533	0.571	0.491
	400	0.4	0.4	0.474	0.437	0.4	0.471	0.468	0.4	0.4	0.4	0.474	0.446	0.4	0.475	0.473	0.4	0.4	0.4	0.474	0.439	0.4	0.467	0.475	0.4	0.4	0.4	0.475	0.437	0.4	0.478	0.471	0.4	0.4	0.4	0.446	0.413	0.4	0.451	0.452	0.4	0.575	0.579	0.592	0.575	0.588	0.628	0.575	0.52
	450	0.45	0.45	0.513	0.469	0.45	0.523	0.51	0.45	0.45	0.45	0.514	0.471	0.45	0.516	0.513	0.45	0.45	0.45	0.514	0.455	0.45	0.513	0.515	0.45	0.45	0.45	0.512	0.467	0.45	0.52	0.511	0.45	0.45	0.45	0.494	0.456	0.45	0.494	0.495	0.45	0.578	0.587	0.609	0.578	0.596	0.624	0.589	0.542
	500	0.5	0.5	0.556	0.537	0.5	0.565	0.552	0.5	0.5	0.5	0.558	0.512	0.5	0.56	0.555	0.5	0.5	0.5	0.559	0.509	0.5	0.563	0.556	0.5	0.5	0.5	0.552	0.505	0.5	0.566	0.553	0.5	0.5	0.5	0.541	0.505	0.5	0.54	0.542	0.5	0.581	0.592	0.636	0.58	0.596	0.689	0.599	0.563
300	50	0.094	0.087	0.106	0.067	0.097	0.068	0.071	0.063	0.078	0.084	0.099	0.06	0.078	0.059	0.079	0.071	0.075	0.085	0.095	0.057	0.107	0.063	0.075	0.071	0.092	0.089	0.112	0.063	0.11	0.065	0.079	0.066	0.057	0.082	0.079	0.053	0.091	0.061	0.059	0.067	0.479	0.476	0.477	0.476	0.481	0.285	0.476	0.099
	100	0.103	0.157	0.159	0.108	0.103	0.128	0.142	0.121	0.11	0.16	0.151	0.135	0.11	0.129	0.137	0.128	0.111	0.155	0.145	0.144	0.169	0.132	0.135	0.123	0.11	0.158	0.164	0.119	0.11	0.136	0.152	0.124	0.121	0.126	0.128	0.133	0.129	0.121	0.111	0.121	0.496	0.494	0.494	0.493	0.5	0.264	0.501	0.188
	150	0.175	0.187	0.209	0.162	0.175	0.18	0.196	0.181	0.182	0.192	0.202	0.179	0.182	0.202	0.202	0.186	0.177	0.181	0.197	0.154	0.191	0.184	0.204	0.179	0.17	0.197	0.215	0.164	0.17	0.189	0.205	0.184	0.15	0.15	0.18	0.16	0.15	0.17	0.179	0.15	0.507	0.504	0.505	0.507	0.515	0.445	0.506	0.269
	200	0.203	0.203	0.26	0.214	0.203	0.247	0.254	0.203	0.206	0.206	0.251	0.206	0.206	0.248	0.256	0.206	0.2	0.2	0.246	0.232	0.2	0.243	0.258	0.2	0.214	0.214	0.263	0.228	0.214	0.253	0.262	0.214	0.2	0.2	0.23	0.221	0.2	0.223	0.231	0.2	0.517	0.513	0.513	0.515	0.524	0.379	0.516	0.337
	250	0.25	0.25	0.31	0.278	0.25	0.3	0.304	0.25	0.25	0.25	0.302	0.277	0.25	0.298	0.311	0.25	0.25	0.25	0.295	0.259	0.25	0.301	0.312	0.25	0.25	0.25	0.315	0.265	0.25	0.308	0.311	0.25	0.25	0.25	0.281	0.256	0.25	0.28	0.286	0.25	0.523	0.523	0.521	0.524	0.533	0.421	0.52	0.39
	300	0.3	0.3	0.359	0.323	0.3	0.36	0.356	0.3	0.3	0.3	0.358	0.32	0.3	0.356	0.361	0.3	0.3	0.3	0.349	0.338	0.3	0.35	0.363	0.3	0.3	0.3	0.364	0.304	0.3	0.353	0.362	0.3	0.3	0.3	0.332	0.319	0.3	0.334	0.338	0.3	0.523	0.531	0.53	0.529	0.533	0.533	0.525	0.429
	350	0.35	0.35	0.412	0.371	0.35	0.415	0.406	0.35	0.35	0.35	0.406	0.355	0.35	0.416	0.409	0.35	0.35	0.35	0.402	0.39	0.35	0.407	0.411	0.35	0.35	0.35	0.413	0.369	0.35	0.405	0.412	0.35	0.35	0.35	0.386	0.365	0.35	0.379	0.385	0.35	0.533	0.535	0.542	0.533	0.54	0.564	0.53	0.465
	400	0.4	0.4	0.453	0.426	0.4	0.455	0.45	0.4	0.4	0.4	0.455	0.408	0.4	0.45	0.451	0.4	0.4	0.4	0.446	0.453	0.4	0.447	0.455	0.4	0.4	0.4	0.457	0.406	0.4	0.46	0.455	0.4	0.4	0.4	0.434	0.422	0.4	0.431	0.43	0.4	0.534	0.54	0.558	0.534	0.544	0.594	0.544	0.488
	450	0.45	0.45	0.495	0.465	0.45	0.492	0.495	0.45	0.45	0.45	0.503	0.466	0.45	0.505	0.497	0.45	0.45	0.45	0.49	0.483	0.45	0.496	0.499	0.45	0.45	0.45	0.5	0.488	0.45	0.504	0.497	0.45	0.45	0.45	0.48	0.45	0.45	0.478	0.48	0.45	0.537	0.548	0.584	0.538	0.544	0.607	0.553	0.518
	500	0.5	0.5	0.534	0.522	0.5	0.545	0.536	0.5	0.5	0.5	0.547	0.544	0.5	0.541	0.539	0.5	0.5	0.5	0.535	0.514	0.5	0.537	0.542	0.5	0.5	0.5	0.539	0.548	0.5	0.541	0.539	0.5	0.5	0.5	0.529	0.511	0.5	0.528	0.526	0.5	0.539	0.552	0.612	0.539	0.544	0.653	0.561	0.535
350	50	0.057	0.078	0.089	0.056	0.057	0.064	0.065	0.065	0.058	0.08	0.088	0.063	0.1	0.061	0.07	0.068	0.058	0.08	0.088	0.052	0.1	0.064	0.068	0.068	0.062	0.083	0.092	0.059	0.102	0.064	0.071	0.066	0.066	0.07	0.062	0.061	0.066	0.058	0.051	0.066	0.438	0.436	0.437	0.437	0.442	0.125	0.438	0.097
	100	0.117	0.14	0.141	0.111	0.117	0.12	0.121	0.123	0.122	0.138	0.139	0.13	0.152	0.126	0.129	0.128	0.122	0.134	0.139	0.104	0.148	0.122	0.13	0.126	0.118	0.143	0.142	0.108	0.156	0.125	0.125	0.126	0.1	0.1	0.115	0.117	0.1	0.117	0.107	0.1	0.452	0.451	0.451	0.451	0.456	0.194	0.454	0.186
	150	0.161	0.161	0.19	0.18	0.161	0.177	0.182	0.161	0.154	0.154	0.187	0.159	0.154	0.183	0.187	0.154	0.15	0.15	0.187	0.157	0.15	0.179	0.188	0.15	0.164	0.163	0.192	0.156	0.166	0.185	0.191	0.164	0.15	0.15	0.163	0.156	0.15	0.17	0.166	0.15	0.462	0.46	0.46	0.462	0.468	0.275	0.461	0.267
	200	0.2	0.2	0.239	0.209	0.2	0.243	0.236	0.2	0.2	0.2	0.238	0.217	0.2	0.232	0.247	0.2	0.2	0.2	0.238	0.202	0.2	0.243	0.247	0.2	0.2	0.2	0.243	0.215	0.2	0.236	0.244	0.2	0.2	0.2	0.215	0.209	0.2	0.217	0.221	0.2	0.472	0.471	0.469	0.468	0.478	0.317	0.469	0.322
	250	0.25	0.25	0.291	0.288	0.25	0.284	0.289	0.25	0.25	0.25	0.29	0.262	0.25	0.297	0.298	0.25	0.25	0.25	0.29	0.258	0.25	0.292	0.298	0.25	0.25	0.25	0.296	0.271	0.25	0.293	0.298	0.25	0.25	0.25	0.265	0.265	0.25	0.268	0.271	0.25	0.474	0.481	0.479	0.478	0.484	0.371	0.476	0.371
	300	0.3	0.3	0.342	0.312	0.3	0.338	0.34	0.3	0.3	0.3	0.344	0.325	0.3	0.35	0.347	0.3	0.3	0.3	0.343	0.301	0.3	0.336	0.346	0.3	0.3	0.3	0.348	0.32	0.3	0.346	0.35	0.3	0.3	0.3	0.32	0.319	0.3	0.318	0.323	0.3	0.48	0.485	0.484	0.48	0.488	0.486	0.478	0.406
	350	0.35	0.35	0.393	0.372	0.35	0.381	0.388	0.35	0.35	0.35	0.392	0.392	0.35	0.389	0.392	0.35	0.35	0.35	0.389	0.373	0.35	0.397	0.391	0.35	0.35	0.35	0.397	0.365	0.35	0.391	0.394	0.35	0.35	0.35	0.372	0.366	0.35	0.378	0.368	0.35	0.483	0.489	0.507	0.483	0.493	0.54	0.483	0.434
	400	0.4	0.4	0.436	0.415	0.4	0.436	0.436	0.4	0.4	0.4	0.437	0.43	0.4	0.432	0.44	0.4	0.4	0.4	0.437	0.407	0.4	0.438	0.439	0.4	0.4	0.4	0.442	0.402	0.4	0.438	0.44	0.4	0.4	0.4	0.42	0.406	0.4	0.423	0.42	0.4	0.487	0.497	0.528	0.487	0.493	0.541	0.499	0.461
	450	0.45	0.45	0.481	0.452	0.45	0.48	0.477	0.45	0.45	0.45	0.487	0.465	0.45	0.486	0.483	0.45	0.45	0.45	0.483	0.468	0.45	0.481	0.483	0.45	0.45	0.45	0.482	0.487	0.45	0.484	0.483	0.45	0.45	0.45	0.47	0.461	0.45	0.468	0.47	0.45	0.489	0.501	0.56	0.489	0.493	0.594	0.512	0.483
	500	0.5	0.5	0.526	0.559	0.5	0.525	0.501	0.5	0.5	0.5	0.53	0.505	0.5	0.53	0.501	0.5	0.5	0.5	0.527	0.526	0.5	0.523	0.501	0.5	0.5	0.5	0.525	0.508	0.5	0.529	0.501	0.5	0.5	0.5	0.516	0.523	0.5	0.514	0.501	0.5	0.501	0.501	0.579	0.501	0.501	0.607	0.532	0.501
400	50	0.054	0.077	0.085	0.061	0.096	0.06	0.063	0.064	0.059	0.08	0.079	0.058	0.093	0.059	0.061	0.065	0.055	0.081	0.083	0.056	0.095	0.064	0.061	0.069	0.05	0.075	0.082	0.07	0.092	0.06	0.068	0.064	0.053	0.053	0.059	0.056	0.053	0.054	0.051	0.053	0.405	0.403	0.404	0.405	0.411	0.091	0.409	0.097
	100	0.118	0.127	0.136	0.125	0.14	0.118	0.124	0.12	0.119	0.118	0.13	0.115	0.123	0.12	0.126	0.119	0.119	0.12	0.134	0.116	0.123	0.123	0.128	0.119	0.118	0.129	0.135	0.101	0.14	0.117	0.129	0.12	0.1	0.1	0.111	0.11	0.1	0.112	0.108	0.1	0.418	0.417	0.416	0.415	0.426	0.298	0.418	0.184
	150	0.15	0.15	0.186	0.189	0.15	0.18	0.18	0.15	0.15	0.15	0.176	0.157	0.15	0.175	0.185	0.15	0.15	0.15	0.18	0.165	0.15	0.171	0.185	0.15	0.15	0.15	0.183	0.157	0.15	0.177	0.182	0.15	0.15	0.15	0.161	0.154	0.15	0.161	0.16	0.15	0.429	0.424	0.423	0.426	0.437	0.29	0.429	0.257
	200	0.2	0.2	0.238	0.237	0.2	0.225	0.235	0.2	0.2	0.2	0.228	0.206	0.2	0.231	0.236	0.2	0.2	0.2	0.232	0.234	0.2	0.224	0.237	0.2	0.2	0.2	0.235	0.213	0.2	0.227	0.238	0.2	0.2	0.2	0.209	0.214	0.2	0.21	0.21	0.2	0.434	0.438	0.436	0.436	0.451	0.348	0.433	0.305
	250	0.25	0.25	0.287	0.269	0.25	0.28	0.287	0.25	0.25	0.25	0.277	0.289	0.25	0.282	0.288	0.25	0.25	0.25	0.28	0.256	0.25	0.285	0.289	0.25	0.25	0.25	0.287	0.254	0.25	0.295	0.291	0.25	0.25	0.25	0.259	0.255	0.25	0.267	0.261	0.25	0.434	0.442	0.441	0.439	0.452	0.45	0.436	0.348
	300	0.3	0.3	0.336	0.336	0.3	0.337	0.335	0.3	0.3	0.3	0.333	0.303	0.3	0.333	0.334	0.3	0.3	0.3	0.335	0.327	0.3	0.336	0.334	0.3	0.3	0.3	0.337	0.324	0.3	0.338	0.337	0.3	0.3	0.3	0.312	0.304	0.3	0.311	0.309	0.3	0.442	0.448	0.463	0.442	0.46	0.505	0.441	0.383
	350	0.35	0.35	0.381	0.369	0.35	0.39	0.384	0.35	0.35	0.35	0.382	0.368	0.35	0.38	0.384	0.35	0.35	0.35	0.383	0.364	0.35	0.374	0.384	0.35	0.35	0.35	0.385	0.35	0.35	0.383	0.383	0.35	0.35	0.35	0.36	0.36	0.35	0.368	0.362	0.35	0.444	0.454	0.483	0.444	0.46	0.513	0.456	0.409
	400	0.4	0.4	0.428	0.402	0.4	0.433	0.425	0.4	0.4	0.4	0.427	0.413	0.4	0.425	0.431	0.4	0.4	0.4	0.428	0.406	0.4	0.43	0.431	0.4	0.4	0.4	0.428	0.406	0.4	0.433	0.428	0.4	0.4	0.4	0.41	0.403	0.4	0.416	0.413	0.4	0.447	0.456	0.513	0.446	0.46	0.538	0.468	0.434
	450	0.45	0.45	0.471	0.463	0.45	0.474	0.451	0.45	0.45	0.45	0.475	0.465	0.45	0.474	0.451	0.45	0.45	0.45	0.475	0.454	0.45	0.471	0.451	0.45	0.45	0.45	0.47	0.477	0.45	0.484	0.451	0.45	0.45	0.45	0.459	0.461	0.45	0.462	0.451	0.45	0.452	0.46	0.534	0.451	0.46	0.55	0.487	0.451
	500	0.5	0.5	0.518	0.515	0.5	0.52	0.5	0.5	0.5	0.5	0.52	0.504	0.5	0.516	0.5	0.5	0.5	0.5	0.521	0.504	0.5	0.519	0.5	0.5	0.5	0.5	0.52	0.516	0.5	0.525	0.5	0.5	0.5	0.5	0.51	0.515	0.5	0.509	0.5	0.5	0.5	0.5	0.552	0.504	0.5	0.566	0.508	0.5
450	50	0.057	0.075	0.077	0.058	0.089	0.059	0.066	0.067	0.063	0.073	0.068	0.052	0.063	0.054	0.06	0.067	0.06	0.062	0.065	0.052	0.066	0.055	0.055	0.06	0.06	0.074	0.07	0.056	0.082	0.056	0.057	0.064	0.05	0.05	0.054	0.051	0.05	0.05	0.051	0.05	0.369	0.368	0.368	0.369	0.371	0.153	0.374	0.095
	100	0.113	0.12	0.129	0.106	0.125	0.118	0.123	0.113	0.1	0.1	0.117	0.109	0.1	0.112	0.115	0.1	0.1	0.1	0.115	0.101	0.1	0.112	0.111	0.1	0.104	0.104	0.124	0.106	0.104	0.118	0.115	0.104	0.1	0.1	0.107	0.103	0.1	0.103	0.105	0.1	0.381	0.379	0.379	0.381	0.382	0.246	0.383	0.178
	150	0.15	0.15	0.179	0.158	0.15	0.178	0.179	0.15	0.15	0.15	0.17	0.154	0.15	0.172	0.173	0.15	0.15	0.15	0.164	0.15	0.15	0.166	0.166	0.15	0.15	0.15	0.174	0.153	0.15	0.174	0.172	0.15	0.15	0.15	0.156	0.152	0.15	0.155	0.154	0.15	0.39	0.388	0.386	0.387	0.395	0.281	0.389	0.243
	200	0.2	0.2	0.229	0.205	0.2	0.231	0.233	0.2	0.2	0.2	0.22	0.211	0.2	0.228	0.226	0.2	0.2	0.2	0.213	0.201	0.2	0.22	0.218	0.2	0.2	0.2	0.225	0.209	0.2	0.229	0.226	0.2	0.2	0.2	0.206	0.205	0.2	0.207	0.204	0.2	0.394	0.398	0.397	0.397	0.401	0.399	0.394	0.288
	250	0.25	0.25	0.283	0.26	0.25	0.276	0.281	0.25	0.25	0.25	0.273	0.256	0.25	0.276	0.275	0.25	0.25	0.25	0.265	0.252	0.25	0.272	0.268	0.25	0.25	0.25	0.276	0.258	0.25	0.276	0.275	0.25	0.25	0.25	0.257	0.251	0.25	0.26	0.253	0.25	0.398	0.403	0.413	0.397	0.41	0.441	0.396	0.335
	300	0.3	0.3	0.33	0.317	0.3	0.332	0.33	0.3	0.3	0.3	0.325	0.301	0.3	0.324	0.324	0.3	0.3	0.3	0.317	0.305	0.3	0.32	0.321	0.3	0.3	0.3	0.326	0.301	0.3	0.327	0.325	0.3	0.3	0.3	0.308	0.309	0.3	0.308	0.305	0.3	0.4	0.411	0.435	0.401	0.41	0.423	0.401	0.361
	350	0.35	0.35	0.376	0.354	0.35	0.38	0.374	0.35	0.35	0.35	0.37	0.351	0.35	0.368	0.374	0.35	0.35	0.35	0.365	0.362	0.35	0.365	0.373	0.35	0.35	0.35	0.37	0.36	0.35	0.376	0.371	0.35	0.35	0.35	0.358	0.352	0.35	0.358	0.359	0.35	0.403	0.414	0.461	0.404	0.41	0.477	0.419	0.389
	400	0.4	0.4	0.421	0.409	0.4	0.427	0.401	0.4	0.4	0.4	0.42	0.408	0.4	0.416	0.401	0.4	0.4	0.4	0.414	0.405	0.4	0.412	0.401	0.4	0.4	0.4	0.419	0.41	0.4	0.419	0.401	0.4	0.4	0.4	0.408	0.405	0.4	0.41	0.401	0.4	0.406	0.416	0.489	0.406	0.412	0.508	0.436	0.407
	450	0.45	0.45	0.47	0.459	0.45	0.477	0.45	0.45	0.45	0.45	0.468	0.452	0.45	0.464	0.45	0.45	0.45	0.45	0.462	0.452	0.45	0.463	0.45	0.45	0.45	0.45	0.468	0.463	0.45	0.466	0.45	0.45	0.45	0.45	0.458	0.455	0.45	0.46	0.45	0.45	0.45	0.45	0.504	0.452	0.45	0.521	0.461	0.45
	500	0.5	0.5	0.511	0.505	0.5	0.507	0.5	0.5	0.5	0.5	0.506	0.514	0.5	0.504	0.5	0.5	0.5	0.5	0.506	0.51	0.5	0.508	0.5	0.5	0.5	0.5	0.508	0.511	0.5	0.506	0.5	0.5	0.5	0.5	0.504	0.503	0.5	0.502	0.5	0.5	0.5	0.5	0.53	0.501	0.5	0.54	0.5	0.5
500	50	0.058	0.069	0.067	0.051	0.074	0.059	0.055	0.064	0.06	0.059	0.06	0.052	0.06	0.054	0.059	0.06	0.056	0.056	0.06	0.052	0.056	0.054	0.06	0.056	0.058	0.074	0.069	0.059	0.08	0.061	0.059	0.064	0.05	0.05	0.052	0.05	0.05	0.05	0.051	0.05	0.325	0.324	0.324	0.325	0.33	0.101	0.329	0.091
	100	0.1	0.1	0.118	0.1	0.1	0.106	0.111	0.1	0.1	0.1	0.109	0.1	0.1	0.111	0.115	0.1	0.1	0.1	0.109	0.105	0.1	0.106	0.114	0.1	0.1	0.1	0.122	0.102	0.1	0.114	0.116	0.1	0.1	0.1	0.103	0.1	0.1	0.103	0.104	0.1	0.337	0.335	0.334	0.336	0.344	0.165	0.339	0.17
	150	0.15	0.15	0.168	0.163	0.15	0.17	0.167	0.15	0.15	0.15	0.161	0.15	0.15	0.159	0.168	0.15	0.15	0.15	0.161	0.15	0.15	0.161	0.167	0.15	0.15	0.15	0.172	0.152	0.15	0.169	0.171	0.15	0.15	0.15	0.151	0.15	0.15	0.152	0.153	0.15	0.347	0.347	0.346	0.347	0.361	0.335	0.344	0.226
	200	0.2	0.2	0.221	0.214	0.2	0.22	0.217	0.2	0.2	0.2	0.212	0.206	0.2	0.209	0.219	0.2	0.2	0.2	0.213	0.202	0.2	0.217	0.217	0.2	0.2	0.2	0.225	0.207	0.2	0.226	0.222	0.2	0.2	0.2	0.201	0.2	0.2	0.206	0.203	0.2	0.347	0.354	0.354	0.349	0.362	0.386	0.348	0.271
	250	0.25	0.25	0.27	0.258	0.25	0.267	0.267	0.25	0.25	0.25	0.265	0.259	0.25	0.27	0.269	0.25	0.25	0.25	0.266	0.256	0.25	0.266	0.268	0.25	0.25	0.25	0.271	0.255	0.25	0.27	0.272	0.25	0.25	0.25	0.252	0.25	0.25	0.255	0.253	0.25	0.351	0.361	0.382	0.351	0.368	0.402	0.351	0.31
	300	0.3	0.3	0.318	0.3	0.3	0.322	0.314	0.3	0.3	0.3	0.313	0.303	0.3	0.318	0.321	0.3	0.3	0.3	0.315	0.302	0.3	0.312	0.322	0.3	0.3	0.3	0.322	0.308	0.3	0.326	0.319	0.3	0.3	0.3	0.302	0.3	0.3	0.307	0.303	0.3	0.354	0.366	0.411	0.354	0.368	0.397	0.366	0.339
	350	0.35	0.35	0.367	0.359	0.35	0.365	0.351	0.35	0.35	0.35	0.366	0.352	0.35	0.36	0.351	0.35	0.35	0.35	0.364	0.356	0.35	0.358	0.351	0.35	0.35	0.35	0.37	0.357	0.35	0.371	0.351	0.35	0.35	0.35	0.354	0.35	0.35	0.353	0.35	0.35	0.358	0.368	0.44	0.358	0.368	0.458	0.386	0.359
	400	0.4	0.4	0.411	0.403	0.4	0.42	0.4	0.4	0.4	0.4	0.414	0.412	0.4	0.41	0.4	0.4	0.4	0.4	0.413	0.4	0.4	0.408	0.4	0.4	0.4	0.4	0.414	0.406	0.4	0.416	0.4	0.4	0.4	0.4	0.403	0.4	0.4	0.4	0.4	0.4	0.4	0.4	0.456	0.404	0.4	0.472	0.413	0.4
	450	0.45	0.45	0.455	0.463	0.45	0.462	0.45	0.45	0.45	0.45	0.455	0.453	0.45	0.454	0.45	0.45	0.45	0.45	0.456	0.458	0.45	0.454	0.45	0.45	0.45	0.45	0.457	0.457	0.45	0.461	0.45	0.45	0.45	0.45	0.452	0.45	0.45	0.454	0.45	0.45	0.45	0.45	0.479	0.451	0.45	0.481	0.45	0.45
	500	0.5	0.5	0.5	0.5	0.5	0.5	0.5	0.5	0.5	0.5	0.5	0.5	0.5	0.5	0.5	0.5	0.5	0.5	0.5	0.5	0.5	0.5	0.5	0.5	0.5	0.5	0.5	0.5	0.5	0.5	0.5	0.5	0.5	0.5	0.5	0.5	0.5	0.5	0.5	0.5	0.5	0.5	0.5	0.5	0.5	0.5	0.5	0.5
[truncated: 17 more columns]

## Sheet: 2.2
kb	ks	CC-CC	CC-H_index	CC-K_shell	CC-EC	CC-LR	CC-R	CC-LC	CC-ECC	H_index-CC	H_index-H_index	H_index-K_shell	H_index-EC	H_index-LR	H_index-R	H_index-LC	H_index-ECC	K_shell-CC	K_shell-H_index	K_shell-K_shell	K_shell-EC	K_shell-LR	K_shell-R	K_shell-LC	K_shell-ECC	EC-CC	EC-H_index	EC-K_shell	EC-EC	EC-LR	EC-R	EC-LC	EC-ECC	LR-CC	LR-H_index	LR-K_shell	LR-EC	LR-LR	LR-R	LR-LC	LR-ECC	R-CC	R-H_index	R-K_shell	R-EC	R-LR	R-R	R-LC	R-ECC
50	50	0.171	0.184	0.19	0.166	0.233	0.113	0.171	0.078	0.166	0.195	0.195	0.152	0.234	0.103	0.183	0.077	0.159	0.195	0.2	0.145	0.255	0.099	0.185	0.082	0.168	0.183	0.186	0.139	0.226	0.109	0.173	0.075	0.139	0.174	0.181	0.141	0.243	0.105	0.167	0.077	0.609	0.606	0.605	0.609	0.615	0.121	0.608	0.109
	100	0.221	0.274	0.269	0.224	0.319	0.203	0.292	0.147	0.217	0.279	0.275	0.229	0.324	0.199	0.302	0.142	0.226	0.279	0.278	0.227	0.36	0.204	0.304	0.148	0.221	0.273	0.268	0.204	0.321	0.208	0.293	0.149	0.213	0.266	0.251	0.196	0.354	0.191	0.291	0.153	0.643	0.653	0.652	0.647	0.673	0.431	0.646	0.221
	150	0.274	0.328	0.31	0.268	0.4	0.275	0.366	0.216	0.276	0.331	0.305	0.271	0.401	0.307	0.373	0.21	0.278	0.336	0.311	0.281	0.411	0.287	0.377	0.211	0.265	0.328	0.304	0.244	0.41	0.29	0.367	0.217	0.265	0.329	0.292	0.233	0.413	0.302	0.364	0.21	0.671	0.677	0.679	0.675	0.699	0.387	0.674	0.313
	200	0.311	0.382	0.347	0.309	0.426	0.369	0.433	0.266	0.31	0.382	0.338	0.297	0.426	0.373	0.438	0.262	0.319	0.385	0.347	0.323	0.5	0.361	0.443	0.27	0.306	0.381	0.348	0.29	0.428	0.37	0.435	0.265	0.301	0.376	0.35	0.277	0.5	0.369	0.431	0.267	0.692	0.699	0.698	0.694	0.72	0.487	0.688	0.388
	250	0.344	0.421	0.429	0.343	0.462	0.462	0.499	0.329	0.348	0.417	0.418	0.345	0.459	0.427	0.503	0.32	0.352	0.42	0.422	0.355	0.545	0.441	0.506	0.33	0.343	0.42	0.427	0.331	0.462	0.453	0.5	0.321	0.337	0.418	0.428	0.321	0.533	0.419	0.495	0.313	0.705	0.713	0.711	0.709	0.73	0.627	0.704	0.461
	300	0.377	0.472	0.511	0.379	0.504	0.517	0.547	0.372	0.377	0.469	0.496	0.378	0.497	0.489	0.548	0.366	0.387	0.472	0.497	0.392	0.556	0.517	0.551	0.374	0.377	0.47	0.508	0.369	0.506	0.499	0.547	0.366	0.37	0.466	0.507	0.354	0.542	0.495	0.541	0.359	0.718	0.725	0.726	0.722	0.747	0.596	0.719	0.524
	350	0.409	0.517	0.572	0.409	0.553	0.566	0.588	0.409	0.405	0.517	0.562	0.403	0.549	0.567	0.591	0.417	0.423	0.519	0.567	0.424	0.559	0.562	0.59	0.419	0.405	0.516	0.567	0.402	0.549	0.56	0.587	0.404	0.394	0.514	0.561	0.39	0.565	0.577	0.583	0.387	0.732	0.736	0.741	0.735	0.761	0.689	0.732	0.58
	400	0.429	0.556	0.607	0.431	0.553	0.615	0.636	0.433	0.432	0.558	0.599	0.427	0.549	0.613	0.637	0.44	0.442	0.559	0.605	0.441	0.619	0.625	0.639	0.443	0.426	0.554	0.605	0.422	0.549	0.611	0.636	0.426	0.416	0.553	0.601	0.414	0.613	0.614	0.631	0.424	0.741	0.745	0.746	0.744	0.774	0.731	0.743	0.624
	450	0.461	0.585	0.645	0.46	0.553	0.663	0.673	0.455	0.455	0.582	0.639	0.455	0.549	0.661	0.672	0.459	0.459	0.585	0.643	0.459	0.625	0.659	0.673	0.461	0.471	0.585	0.643	0.457	0.549	0.662	0.671	0.454	0.473	0.581	0.638	0.484	0.619	0.664	0.668	0.461	0.748	0.75	0.753	0.748	0.781	0.792	0.747	0.669
	500	0.535	0.605	0.681	0.521	0.553	0.714	0.703	0.513	0.522	0.608	0.676	0.52	0.549	0.708	0.702	0.512	0.52	0.608	0.673	0.515	0.625	0.708	0.703	0.508	0.534	0.605	0.681	0.526	0.549	0.702	0.701	0.514	0.537	0.603	0.676	0.516	0.619	0.721	0.699	0.515	0.752	0.757	0.755	0.754	0.784	0.808	0.753	0.697
100	50	0.102	0.163	0.136	0.111	0.218	0.109	0.142	0.064	0.077	0.141	0.112	0.077	0.175	0.096	0.127	0.056	0.1	0.146	0.117	0.111	0.21	0.093	0.129	0.059	0.107	0.159	0.141	0.109	0.211	0.097	0.14	0.065	0.065	0.122	0.094	0.061	0.162	0.093	0.108	0.062	0.57	0.563	0.568	0.569	0.579	0.148	0.57	0.108
	100	0.157	0.228	0.188	0.16	0.294	0.202	0.234	0.124	0.123	0.209	0.199	0.118	0.254	0.177	0.229	0.11	0.148	0.219	0.193	0.148	0.304	0.187	0.231	0.12	0.152	0.228	0.196	0.155	0.303	0.187	0.235	0.125	0.116	0.189	0.188	0.122	0.232	0.182	0.199	0.111	0.601	0.615	0.615	0.606	0.625	0.281	0.604	0.211
	150	0.203	0.286	0.284	0.204	0.405	0.295	0.318	0.183	0.16	0.274	0.283	0.162	0.306	0.243	0.307	0.158	0.185	0.272	0.276	0.184	0.399	0.267	0.306	0.173	0.196	0.273	0.273	0.186	0.414	0.27	0.317	0.18	0.178	0.26	0.282	0.181	0.294	0.248	0.282	0.157	0.632	0.639	0.637	0.632	0.659	0.37	0.633	0.301
	200	0.235	0.342	0.365	0.239	0.444	0.33	0.391	0.224	0.206	0.333	0.379	0.211	0.362	0.337	0.377	0.206	0.221	0.339	0.368	0.222	0.421	0.333	0.376	0.22	0.232	0.338	0.36	0.229	0.439	0.335	0.391	0.225	0.261	0.326	0.377	0.255	0.371	0.316	0.358	0.222	0.646	0.657	0.652	0.65	0.675	0.46	0.647	0.375
	250	0.263	0.4	0.454	0.261	0.451	0.414	0.446	0.273	0.281	0.398	0.441	0.277	0.42	0.413	0.436	0.264	0.261	0.397	0.441	0.26	0.448	0.415	0.434	0.26	0.257	0.397	0.451	0.255	0.446	0.391	0.447	0.261	0.299	0.392	0.431	0.305	0.39	0.383	0.42	0.281	0.66	0.667	0.667	0.662	0.695	0.545	0.662	0.454
	300	0.309	0.45	0.492	0.309	0.523	0.459	0.495	0.304	0.334	0.447	0.483	0.332	0.42	0.458	0.485	0.316	0.334	0.444	0.483	0.326	0.512	0.452	0.482	0.314	0.326	0.446	0.489	0.311	0.52	0.476	0.496	0.309	0.381	0.431	0.475	0.345	0.39	0.459	0.465	0.332	0.672	0.681	0.683	0.679	0.708	0.621	0.672	0.512
	350	0.379	0.479	0.535	0.379	0.537	0.52	0.545	0.361	0.414	0.479	0.528	0.39	0.42	0.52	0.539	0.374	0.385	0.474	0.528	0.394	0.522	0.51	0.536	0.368	0.393	0.483	0.534	0.378	0.532	0.529	0.546	0.371	0.39	0.461	0.519	0.409	0.39	0.507	0.52	0.38	0.685	0.69	0.689	0.688	0.719	0.708	0.688	0.56
	400	0.451	0.511	0.578	0.415	0.537	0.572	0.587	0.425	0.42	0.503	0.575	0.448	0.42	0.559	0.583	0.418	0.424	0.5	0.572	0.447	0.522	0.56	0.581	0.42	0.446	0.51	0.579	0.421	0.532	0.588	0.588	0.429	0.408	0.48	0.565	0.45	0.414	0.562	0.564	0.446	0.696	0.694	0.694	0.694	0.727	0.667	0.695	0.608
	450	0.451	0.525	0.611	0.483	0.537	0.627	0.622	0.477	0.474	0.511	0.611	0.475	0.482	0.606	0.617	0.488	0.472	0.51	0.61	0.485	0.522	0.618	0.615	0.488	0.454	0.522	0.611	0.524	0.532	0.621	0.621	0.486	0.486	0.496	0.601	0.489	0.49	0.614	0.605	0.492	0.698	0.7	0.701	0.7	0.729	0.693	0.707	0.632
	500	0.525	0.536	0.652	0.522	0.537	0.676	0.654	0.529	0.516	0.523	0.654	0.531	0.518	0.651	0.65	0.518	0.514	0.521	0.654	0.53	0.522	0.663	0.649	0.516	0.524	0.531	0.652	0.549	0.532	0.676	0.654	0.526	0.504	0.504	0.647	0.567	0.504	0.652	0.641	0.504	0.708	0.709	0.707	0.709	0.733	0.758	0.714	0.661
150	50	0.079	0.131	0.111	0.071	0.188	0.086	0.107	0.064	0.073	0.121	0.108	0.058	0.156	0.087	0.114	0.059	0.07	0.119	0.109	0.072	0.174	0.092	0.109	0.065	0.074	0.128	0.11	0.07	0.179	0.095	0.098	0.056	0.076	0.1	0.104	0.058	0.13	0.086	0.086	0.066	0.53	0.529	0.535	0.532	0.539	0.142	0.53	0.113
	100	0.114	0.19	0.195	0.114	0.298	0.178	0.203	0.108	0.124	0.178	0.184	0.13	0.209	0.161	0.204	0.112	0.134	0.181	0.193	0.134	0.294	0.166	0.202	0.119	0.112	0.198	0.203	0.111	0.293	0.162	0.194	0.11	0.147	0.187	0.208	0.119	0.195	0.169	0.172	0.117	0.56	0.56	0.561	0.566	0.582	0.276	0.563	0.211
	150	0.162	0.26	0.289	0.153	0.353	0.25	0.283	0.153	0.179	0.252	0.283	0.19	0.268	0.246	0.278	0.165	0.203	0.252	0.292	0.199	0.321	0.236	0.276	0.175	0.17	0.261	0.303	0.159	0.349	0.244	0.275	0.158	0.201	0.261	0.304	0.233	0.288	0.232	0.253	0.178	0.585	0.595	0.593	0.588	0.611	0.389	0.588	0.29
	200	0.241	0.325	0.372	0.242	0.38	0.319	0.347	0.215	0.232	0.321	0.352	0.221	0.329	0.3	0.34	0.214	0.234	0.318	0.351	0.286	0.374	0.315	0.336	0.215	0.238	0.324	0.375	0.235	0.395	0.307	0.34	0.214	0.288	0.317	0.353	0.229	0.288	0.292	0.313	0.24	0.605	0.608	0.604	0.6	0.629	0.435	0.602	0.373
	250	0.293	0.377	0.418	0.282	0.45	0.385	0.401	0.271	0.317	0.371	0.4	0.359	0.329	0.373	0.396	0.275	0.322	0.365	0.396	0.284	0.422	0.372	0.394	0.275	0.3	0.373	0.419	0.272	0.445	0.373	0.398	0.275	0.288	0.356	0.401	0.29	0.288	0.35	0.369	0.284	0.612	0.618	0.62	0.614	0.635	0.512	0.617	0.436
	300	0.36	0.411	0.464	0.344	0.462	0.452	0.455	0.333	0.329	0.399	0.446	0.332	0.329	0.418	0.452	0.324	0.322	0.4	0.44	0.36	0.428	0.424	0.451	0.321	0.351	0.407	0.464	0.327	0.451	0.452	0.453	0.334	0.31	0.384	0.45	0.335	0.31	0.415	0.426	0.356	0.628	0.631	0.632	0.628	0.654	0.539	0.628	0.487
	350	0.36	0.439	0.507	0.427	0.462	0.499	0.5	0.378	0.367	0.42	0.494	0.411	0.373	0.493	0.502	0.395	0.372	0.414	0.491	0.445	0.428	0.486	0.501	0.396	0.351	0.433	0.508	0.412	0.451	0.498	0.5	0.389	0.386	0.396	0.49	0.381	0.386	0.467	0.479	0.398	0.638	0.636	0.639	0.642	0.655	0.64	0.639	0.538
	400	0.43	0.453	0.543	0.425	0.462	0.554	0.541	0.446	0.429	0.436	0.535	0.455	0.431	0.533	0.543	0.433	0.422	0.427	0.529	0.503	0.428	0.531	0.541	0.422	0.431	0.443	0.544	0.472	0.451	0.542	0.54	0.441	0.406	0.406	0.53	0.431	0.406	0.508	0.521	0.406	0.643	0.642	0.642	0.645	0.658	0.703	0.646	0.573
	450	0.458	0.462	0.589	0.516	0.462	0.596	0.581	0.46	0.45	0.45	0.582	0.514	0.45	0.59	0.581	0.45	0.45	0.45	0.576	0.488	0.45	0.581	0.578	0.45	0.451	0.451	0.59	0.52	0.451	0.59	0.579	0.451	0.45	0.45	0.576	0.491	0.45	0.571	0.561	0.45	0.653	0.653	0.651	0.651	0.663	0.712	0.663	0.602
	500	0.5	0.5	0.626	0.567	0.5	0.627	0.622	0.5	0.5	0.5	0.621	0.563	0.5	0.632	0.622	0.5	0.5	0.5	0.615	0.542	0.5	0.623	0.621	0.5	0.5	0.5	0.627	0.541	0.5	0.632	0.62	0.5	0.5	0.5	0.618	0.578	0.5	0.618	0.606	0.5	0.658	0.664	0.68	0.657	0.678	0.749	0.673	0.629
200	50	0.062	0.114	0.114	0.057	0.169	0.081	0.089	0.06	0.099	0.094	0.104	0.066	0.111	0.079	0.087	0.066	0.093	0.092	0.098	0.057	0.167	0.079	0.093	0.068	0.06	0.111	0.113	0.059	0.141	0.091	0.1	0.054	0.094	0.103	0.124	0.06	0.103	0.072	0.072	0.078	0.498	0.499	0.501	0.501	0.509	0.128	0.498	0.113
	100	0.149	0.19	0.218	0.12	0.265	0.151	0.178	0.111	0.155	0.181	0.221	0.137	0.197	0.158	0.171	0.118	0.15	0.176	0.218	0.116	0.247	0.145	0.172	0.115	0.116	0.191	0.205	0.109	0.209	0.163	0.187	0.111	0.172	0.181	0.205	0.115	0.172	0.142	0.143	0.137	0.529	0.534	0.537	0.534	0.552	0.363	0.53	0.204
	150	0.189	0.259	0.295	0.166	0.309	0.242	0.257	0.181	0.251	0.254	0.286	0.193	0.251	0.219	0.246	0.188	0.241	0.25	0.285	0.209	0.308	0.224	0.247	0.184	0.183	0.26	0.29	0.215	0.277	0.232	0.254	0.163	0.172	0.243	0.256	0.155	0.172	0.207	0.219	0.182	0.552	0.561	0.558	0.553	0.576	0.406	0.553	0.282
	200	0.265	0.318	0.337	0.276	0.379	0.304	0.322	0.235	0.251	0.303	0.336	0.239	0.251	0.289	0.307	0.237	0.25	0.301	0.333	0.23	0.362	0.281	0.307	0.236	0.253	0.315	0.336	0.268	0.277	0.298	0.316	0.226	0.224	0.281	0.311	0.234	0.224	0.272	0.279	0.26	0.57	0.575	0.571	0.565	0.592	0.449	0.572	0.361
	250	0.277	0.352	0.387	0.261	0.397	0.352	0.382	0.274	0.251	0.342	0.383	0.298	0.251	0.343	0.371	0.301	0.25	0.34	0.381	0.295	0.372	0.349	0.368	0.3	0.277	0.346	0.385	0.281	0.277	0.369	0.374	0.273	0.294	0.303	0.363	0.29	0.294	0.319	0.341	0.302	0.58	0.587	0.589	0.581	0.601	0.539	0.582	0.424
	300	0.319	0.378	0.435	0.332	0.397	0.426	0.432	0.345	0.335	0.356	0.433	0.349	0.335	0.402	0.423	0.355	0.334	0.358	0.428	0.331	0.372	0.395	0.421	0.354	0.319	0.372	0.433	0.331	0.319	0.424	0.425	0.345	0.312	0.316	0.408	0.371	0.312	0.376	0.389	0.312	0.596	0.594	0.595	0.597	0.611	0.568	0.596	0.47
	350	0.383	0.389	0.471	0.422	0.397	0.467	0.479	0.391	0.365	0.368	0.472	0.422	0.365	0.443	0.469	0.365	0.366	0.371	0.471	0.374	0.372	0.455	0.463	0.368	0.379	0.384	0.473	0.381	0.379	0.459	0.474	0.385	0.35	0.35	0.455	0.357	0.35	0.445	0.44	0.35	0.604	0.599	0.598	0.603	0.612	0.626	0.603	0.521
	400	0.4	0.4	0.52	0.437	0.4	0.536	0.521	0.4	0.4	0.4	0.522	0.429	0.4	0.521	0.51	0.4	0.4	0.4	0.516	0.433	0.4	0.518	0.505	0.4	0.4	0.4	0.52	0.448	0.4	0.528	0.518	0.4	0.4	0.4	0.503	0.443	0.4	0.487	0.482	0.4	0.608	0.607	0.608	0.607	0.618	0.676	0.617	0.553
	450	0.45	0.45	0.561	0.483	0.45	0.574	0.563	0.45	0.45	0.45	0.564	0.491	0.45	0.558	0.555	0.45	0.45	0.45	0.559	0.479	0.45	0.555	0.55	0.45	0.45	0.45	0.559	0.521	0.45	0.579	0.561	0.45	0.45	0.45	0.546	0.468	0.45	0.529	0.534	0.45	0.616	0.615	0.624	0.615	0.627	0.691	0.63	0.574
	500	0.5	0.5	0.602	0.571	0.5	0.606	0.599	0.5	0.5	0.5	0.601	0.525	0.5	0.594	0.59	0.5	0.5	0.5	0.597	0.518	0.5	0.602	0.586	0.5	0.5	0.5	0.601	0.525	0.5	0.599	0.595	0.5	0.5	0.5	0.579	0.51	0.5	0.582	0.575	0.5	0.618	0.628	0.655	0.618	0.633	0.703	0.639	0.601
250	50	0.059	0.105	0.112	0.067	0.13	0.079	0.088	0.06	0.086	0.101	0.121	0.06	0.105	0.076	0.085	0.072	0.09	0.101	0.122	0.064	0.109	0.076	0.078	0.072	0.061	0.1	0.114	0.055	0.153	0.08	0.098	0.053	0.106	0.098	0.121	0.057	0.121	0.068	0.063	0.078	0.442	0.445	0.443	0.443	0.455	0.13	0.443	0.105
	100	0.144	0.181	0.208	0.132	0.206	0.157	0.172	0.111	0.186	0.185	0.215	0.11	0.186	0.141	0.166	0.138	0.175	0.181	0.21	0.122	0.175	0.144	0.16	0.137	0.126	0.185	0.211	0.115	0.212	0.149	0.167	0.119	0.121	0.172	0.177	0.135	0.121	0.141	0.148	0.12	0.475	0.478	0.474	0.476	0.495	0.246	0.475	0.206
	150	0.194	0.252	0.253	0.193	0.206	0.227	0.238	0.17	0.186	0.24	0.268	0.222	0.186	0.209	0.228	0.186	0.175	0.237	0.262	0.174	0.175	0.201	0.225	0.187	0.212	0.25	0.261	0.185	0.292	0.22	0.236	0.179	0.175	0.229	0.233	0.181	0.175	0.211	0.21	0.201	0.502	0.496	0.495	0.5	0.523	0.326	0.499	0.283
	200	0.206	0.29	0.304	0.213	0.206	0.28	0.303	0.22	0.212	0.28	0.315	0.234	0.212	0.278	0.29	0.262	0.221	0.274	0.311	0.229	0.221	0.281	0.287	0.259	0.212	0.289	0.311	0.265	0.33	0.285	0.303	0.222	0.241	0.258	0.288	0.255	0.241	0.259	0.269	0.255	0.51	0.518	0.517	0.514	0.544	0.363	0.516	0.351
	250	0.286	0.323	0.357	0.273	0.286	0.349	0.355	0.3	0.286	0.299	0.365	0.277	0.286	0.333	0.347	0.304	0.285	0.29	0.36	0.264	0.285	0.329	0.344	0.293	0.278	0.315	0.367	0.297	0.334	0.346	0.355	0.298	0.271	0.273	0.337	0.255	0.271	0.321	0.324	0.271	0.527	0.525	0.53	0.524	0.559	0.498	0.526	0.409
	300	0.334	0.332	0.4	0.349	0.334	0.394	0.409	0.334	0.31	0.313	0.409	0.329	0.31	0.39	0.395	0.312	0.3	0.3	0.401	0.33	0.3	0.381	0.393	0.3	0.326	0.331	0.409	0.358	0.334	0.4	0.405	0.328	0.3	0.3	0.382	0.329	0.3	0.363	0.38	0.3	0.538	0.533	0.535	0.538	0.568	0.548	0.54	0.454
	350	0.35	0.35	0.451	0.414	0.35	0.449	0.452	0.35	0.35	0.35	0.46	0.409	0.35	0.436	0.438	0.35	0.35	0.35	0.451	0.39	0.35	0.446	0.438	0.35	0.35	0.35	0.454	0.402	0.35	0.441	0.451	0.35	0.35	0.35	0.436	0.414	0.35	0.424	0.424	0.35	0.546	0.543	0.543	0.543	0.573	0.578	0.56	0.491
	400	0.4	0.4	0.494	0.425	0.4	0.506	0.496	0.4	0.4	0.4	0.502	0.441	0.4	0.476	0.491	0.4	0.4	0.4	0.495	0.442	0.4	0.484	0.49	0.4	0.4	0.4	0.494	0.426	0.4	0.495	0.497	0.4	0.4	0.4	0.48	0.439	0.4	0.472	0.477	0.4	0.556	0.557	0.573	0.554	0.573	0.569	0.582	0.522
	450	0.45	0.45	0.533	0.475	0.45	0.549	0.535	0.45	0.45	0.45	0.543	0.487	0.45	0.538	0.53	0.45	0.45	0.45	0.535	0.474	0.45	0.531	0.53	0.45	0.45	0.45	0.539	0.484	0.45	0.539	0.534	0.45	0.45	0.45	0.522	0.483	0.45	0.522	0.521	0.45	0.558	0.57	0.6	0.558	0.585	0.63	0.595	0.542
	500	0.5	0.5	0.573	0.526	0.5	0.592	0.565	0.5	0.5	0.5	0.58	0.551	0.5	0.576	0.566	0.5	0.5	0.5	0.573	0.537	0.5	0.575	0.566	0.5	0.5	0.5	0.577	0.526	0.5	0.577	0.566	0.5	0.5	0.5	0.563	0.558	0.5	0.56	0.56	0.5	0.561	0.581	0.619	0.56	0.585	0.674	0.602	0.56
300	50	0.06	0.103	0.112	0.051	0.106	0.069	0.093	0.057	0.119	0.099	0.127	0.054	0.131	0.071	0.074	0.077	0.107	0.096	0.128	0.069	0.129	0.075	0.073	0.072	0.08	0.097	0.115	0.073	0.109	0.081	0.083	0.066	0.051	0.092	0.088	0.062	0.107	0.067	0.059	0.069	0.41	0.411	0.411	0.414	0.423	0.114	0.413	0.101
	100	0.125	0.174	0.189	0.154	0.167	0.152	0.166	0.118	0.119	0.173	0.185	0.152	0.217	0.131	0.151	0.135	0.125	0.175	0.186	0.138	0.215	0.134	0.151	0.127	0.143	0.177	0.187	0.129	0.158	0.148	0.157	0.121	0.135	0.154	0.148	0.101	0.173	0.134	0.131	0.143	0.444	0.445	0.446	0.442	0.464	0.228	0.445	0.199
	150	0.167	0.236	0.234	0.178	0.167	0.217	0.236	0.166	0.177	0.218	0.24	0.159	0.249	0.204	0.211	0.213	0.171	0.216	0.239	0.2	0.247	0.198	0.212	0.207	0.158	0.231	0.239	0.183	0.158	0.206	0.228	0.168	0.193	0.197	0.203	0.164	0.203	0.186	0.194	0.195	0.468	0.46	0.458	0.461	0.489	0.324	0.462	0.276
	200	0.227	0.269	0.287	0.219	0.227	0.282	0.291	0.241	0.239	0.244	0.292	0.24	0.261	0.263	0.27	0.247	0.239	0.241	0.292	0.245	0.255	0.265	0.27	0.247	0.234	0.269	0.294	0.226	0.234	0.269	0.283	0.248	0.207	0.209	0.256	0.226	0.209	0.243	0.249	0.209	0.475	0.476	0.48	0.479	0.497	0.361	0.478	0.337
	250	0.283	0.29	0.337	0.279	0.283	0.337	0.347	0.291	0.257	0.26	0.337	0.289	0.261	0.324	0.319	0.261	0.255	0.255	0.338	0.268	0.255	0.323	0.32	0.255	0.28	0.283	0.344	0.281	0.28	0.328	0.337	0.284	0.25	0.25	0.304	0.256	0.25	0.303	0.301	0.25	0.486	0.481	0.485	0.488	0.515	0.438	0.489	0.386
	300	0.301	0.301	0.387	0.318	0.301	0.384	0.39	0.301	0.3	0.3	0.391	0.376	0.3	0.361	0.368	0.3	0.3	0.3	0.391	0.379	0.3	0.363	0.37	0.3	0.3	0.3	0.388	0.345	0.3	0.388	0.385	0.3	0.3	0.3	0.359	0.376	0.3	0.361	0.355	0.3	0.496	0.491	0.49	0.496	0.526	0.497	0.504	0.434
	350	0.35	0.35	0.433	0.413	0.35	0.435	0.437	0.35	0.35	0.35	0.434	0.399	0.35	0.429	0.425	0.35	0.35	0.35	0.435	0.432	0.35	0.411	0.426	0.35	0.35	0.35	0.434	0.364	0.35	0.426	0.432	0.35	0.35	0.35	0.406	0.365	0.35	0.403	0.41	0.35	0.505	0.507	0.516	0.503	0.526	0.55	0.524	0.469
	400	0.4	0.4	0.476	0.426	0.4	0.477	0.476	0.4	0.4	0.4	0.481	0.461	0.4	0.466	0.468	0.4	0.4	0.4	0.479	0.415	0.4	0.475	0.469	0.4	0.4	0.4	0.48	0.422	0.4	0.479	0.473	0.4	0.4	0.4	0.458	0.411	0.4	0.454	0.456	0.4	0.51	0.525	0.546	0.511	0.544	0.599	0.545	0.491
	450	0.45	0.45	0.517	0.511	0.45	0.518	0.509	0.45	0.45	0.45	0.522	0.482	0.45	0.524	0.507	0.45	0.45	0.45	0.521	0.469	0.45	0.504	0.507	0.45	0.45	0.45	0.521	0.488	0.45	0.519	0.509	0.45	0.45	0.45	0.501	0.479	0.45	0.485	0.498	0.45	0.512	0.533	0.57	0.513	0.544	0.595	0.554	0.507
	500	0.5	0.5	0.558	0.553	0.5	0.564	0.529	0.5	0.5	0.5	0.554	0.537	0.5	0.559	0.532	0.5	0.5	0.5	0.551	0.521	0.5	0.561	0.532	0.5	0.5	0.5	0.555	0.518	0.5	0.558	0.532	0.5	0.5	0.5	0.538	0.53	0.5	0.547	0.529	0.5	0.522	0.542	0.589	0.522	0.544	0.631	0.561	0.519
350	50	0.071	0.096	0.11	0.061	0.1	0.083	0.092	0.054	0.077	0.094	0.101	0.069	0.077	0.07	0.072	0.068	0.07	0.093	0.098	0.083	0.07	0.069	0.07	0.067	0.071	0.091	0.106	0.054	0.109	0.073	0.071	0.064	0.079	0.089	0.074	0.054	0.097	0.062	0.062	0.085	0.382	0.381	0.382	0.381	0.393	0.111	0.381	0.101
	100	0.143	0.172	0.177	0.122	0.143	0.151	0.163	0.114	0.119	0.155	0.157	0.118	0.119	0.129	0.147	0.141	0.126	0.159	0.154	0.129	0.126	0.13	0.141	0.146	0.109	0.169	0.162	0.124	0.191	0.144	0.146	0.111	0.141	0.144	0.131	0.128	0.149	0.116	0.119	0.145	0.412	0.41	0.409	0.408	0.43	0.225	0.412	0.189
	150	0.157	0.219	0.228	0.167	0.157	0.202	0.222	0.181	0.187	0.194	0.21	0.217	0.187	0.195	0.205	0.193	0.186	0.185	0.203	0.166	0.186	0.193	0.198	0.192	0.183	0.21	0.219	0.169	0.233	0.208	0.206	0.191	0.161	0.163	0.188	0.161	0.165	0.177	0.176	0.161	0.429	0.431	0.429	0.425	0.453	0.343	0.426	0.26
	200	0.229	0.249	0.28	0.22	0.229	0.26	0.281	0.239	0.209	0.211	0.262	0.221	0.209	0.248	0.255	0.211	0.2	0.2	0.26	0.239	0.2	0.241	0.252	0.2	0.231	0.23	0.272	0.214	0.237	0.263	0.264	0.231	0.2	0.2	0.243	0.205	0.2	0.238	0.229	0.2	0.438	0.437	0.441	0.439	0.472	0.37	0.441	0.322
	250	0.261	0.263	0.33	0.259	0.261	0.322	0.328	0.261	0.25	0.25	0.309	0.286	0.25	0.299	0.31	0.25	0.25	0.25	0.307	0.31	0.25	0.304	0.307	0.25	0.25	0.25	0.32	0.268	0.25	0.317	0.313	0.25	0.25	0.25	0.299	0.251	0.25	0.283	0.286	0.25	0.45	0.446	0.446	0.449	0.484	0.473	0.45	0.373
	300	0.3	0.3	0.374	0.356	0.3	0.381	0.376	0.3	0.3	0.3	0.361	0.328	0.3	0.344	0.362	0.3	0.3	0.3	0.359	0.33	0.3	0.352	0.361	0.3	0.3	0.3	0.371	0.316	0.3	0.375	0.363	0.3	0.3	0.3	0.348	0.312	0.3	0.341	0.343	0.3	0.459	0.459	0.467	0.458	0.484	0.485	0.471	0.411
	350	0.35	0.35	0.417	0.367	0.35	0.425	0.418	0.35	0.35	0.35	0.41	0.378	0.35	0.413	0.408	0.35	0.35	0.35	0.409	0.393	0.35	0.403	0.407	0.35	0.35	0.35	0.411	0.396	0.35	0.413	0.407	0.35	0.35	0.35	0.395	0.363	0.35	0.392	0.392	0.35	0.467	0.48	0.502	0.466	0.502	0.531	0.496	0.436
	400	0.4	0.4	0.46	0.411	0.4	0.475	0.452	0.4	0.4	0.4	0.454	0.419	0.4	0.448	0.451	0.4	0.4	0.4	0.452	0.419	0.4	0.453	0.452	0.4	0.4	0.4	0.457	0.418	0.4	0.463	0.451	0.4	0.4	0.4	0.44	0.41	0.4	0.445	0.438	0.4	0.47	0.487	0.527	0.47	0.502	0.548	0.51	0.457
	450	0.45	0.45	0.504	0.465	0.45	0.501	0.478	0.45	0.45	0.45	0.494	0.461	0.45	0.491	0.479	0.45	0.45	0.45	0.494	0.482	0.45	0.497	0.48	0.45	0.45	0.45	0.506	0.455	0.45	0.503	0.479	0.45	0.45	0.45	0.481	0.465	0.45	0.492	0.478	0.45	0.477	0.5	0.546	0.478	0.502	0.586	0.517	0.473
	500	0.5	0.5	0.537	0.534	0.5	0.553	0.5	0.5	0.5	0.5	0.531	0.519	0.5	0.538	0.5	0.5	0.5	0.5	0.53	0.535	0.5	0.536	0.5	0.5	0.5	0.5	0.537	0.523	0.5	0.547	0.5	0.5	0.5	0.5	0.521	0.531	0.5	0.536	0.5	0.5	0.502	0.502	0.573	0.504	0.502	0.616	0.532	0.502
400	50	0.074	0.096	0.103	0.056	0.095	0.07	0.08	0.061	0.052	0.095	0.088	0.06	0.052	0.062	0.076	0.068	0.074	0.081	0.069	0.066	0.074	0.057	0.064	0.082	0.07	0.093	0.097	0.063	0.082	0.063	0.076	0.058	0.076	0.083	0.066	0.057	0.086	0.054	0.057	0.08	0.349	0.351	0.351	0.348	0.361	0.143	0.351	0.097
	100	0.105	0.162	0.153	0.128	0.105	0.128	0.145	0.123	0.134	0.143	0.142	0.138	0.134	0.124	0.139	0.142	0.114	0.114	0.123	0.101	0.114	0.121	0.119	0.114	0.116	0.158	0.155	0.117	0.116	0.124	0.14	0.13	0.1	0.1	0.12	0.121	0.1	0.113	0.11	0.1	0.379	0.377	0.375	0.374	0.392	0.281	0.376	0.179
	150	0.183	0.202	0.209	0.184	0.183	0.204	0.205	0.189	0.164	0.166	0.195	0.168	0.164	0.184	0.194	0.164	0.15	0.15	0.179	0.164	0.15	0.174	0.174	0.15	0.182	0.192	0.208	0.193	0.182	0.195	0.201	0.188	0.15	0.15	0.175	0.166	0.15	0.169	0.163	0.15	0.393	0.393	0.393	0.391	0.411	0.337	0.393	0.247
	200	0.215	0.217	0.262	0.221	0.215	0.253	0.256	0.215	0.2	0.2	0.247	0.208	0.2	0.242	0.246	0.2	0.2	0.2	0.234	0.215	0.2	0.23	0.233	0.2	0.206	0.206	0.262	0.227	0.206	0.258	0.251	0.206	0.2	0.2	0.23	0.205	0.2	0.226	0.221	0.2	0.405	0.401	0.4	0.403	0.415	0.389	0.407	0.306
	250	0.25	0.25	0.312	0.264	0.25	0.313	0.308	0.25	0.25	0.25	0.302	0.3	0.25	0.287	0.298	0.25	0.25	0.25	0.288	0.281	0.25	0.274	0.286	0.25	0.25	0.25	0.31	0.267	0.25	0.304	0.303	0.25	0.25	0.25	0.286	0.254	0.25	0.275	0.276	0.25	0.413	0.412	0.409	0.414	0.429	0.402	0.416	0.354
	300	0.3	0.3	0.359	0.315	0.3	0.366	0.353	0.3	0.3	0.3	0.351	0.339	0.3	0.343	0.349	0.3	0.3	0.3	0.334	0.312	0.3	0.328	0.337	0.3	0.3	0.3	0.357	0.322	0.3	0.356	0.351	0.3	0.3	0.3	0.333	0.304	0.3	0.328	0.324	0.3	0.424	0.435	0.454	0.423	0.441	0.432	0.441	0.386
	350	0.35	0.35	0.406	0.353	0.35	0.407	0.394	0.35	0.35	0.35	0.399	0.391	0.35	0.389	0.395	0.35	0.35	0.35	0.386	0.361	0.35	0.382	0.392	0.35	0.35	0.35	0.405	0.384	0.35	0.411	0.396	0.35	0.35	0.35	0.379	0.366	0.35	0.377	0.375	0.35	0.431	0.448	0.48	0.431	0.441	0.483	0.46	0.405
	400	0.4	0.4	0.446	0.413	0.4	0.447	0.427	0.4	0.4	0.4	0.441	0.429	0.4	0.435	0.426	0.4	0.4	0.4	0.432	0.404	0.4	0.424	0.426	0.4	0.4	0.4	0.449	0.438	0.4	0.452	0.428	0.4	0.4	0.4	0.425	0.406	0.4	0.425	0.422	0.4	0.436	0.46	0.499	0.437	0.441	0.514	0.47	0.43
	450	0.45	0.45	0.486	0.465	0.45	0.495	0.45	0.45	0.45	0.45	0.477	0.469	0.45	0.479	0.45	0.45	0.45	0.45	0.466	0.458	0.45	0.476	0.45	0.45	0.45	0.45	0.488	0.485	0.45	0.49	0.45	0.45	0.45	0.45	0.464	0.459	0.45	0.463	0.45	0.45	0.453	0.461	0.526	0.45	0.461	0.565	0.484	0.453
	500	0.5	0.5	0.523	0.518	0.5	0.529	0.5	0.5	0.5	0.5	0.517	0.522	0.5	0.521	0.5	0.5	0.5	0.5	0.509	0.523	0.5	0.513	0.5	0.5	0.5	0.5	0.523	0.511	0.5	0.532	0.5	0.5	0.5	0.5	0.511	0.517	0.5	0.52	0.5	0.5	0.5	0.5	0.55	0.505	0.5	0.574	0.503	0.5
450	50	0.056	0.096	0.091	0.054	0.108	0.064	0.062	0.06	0.068	0.082	0.076	0.072	0.092	0.064	0.07	0.078	0.076	0.08	0.068	0.063	0.076	0.054	0.058	0.08	0.065	0.094	0.094	0.063	0.111	0.066	0.067	0.061	0.076	0.075	0.063	0.075	0.076	0.055	0.057	0.076	0.311	0.314	0.313	0.308	0.324	0.111	0.309	0.098
	100	0.134	0.145	0.146	0.106	0.16	0.127	0.129	0.138	0.116	0.117	0.128	0.129	0.126	0.117	0.125	0.116	0.1	0.1	0.12	0.113	0.1	0.117	0.115	0.1	0.129	0.149	0.15	0.107	0.167	0.132	0.132	0.141	0.1	0.1	0.116	0.113	0.1	0.112	0.108	0.1	0.331	0.333	0.336	0.331	0.351	0.219	0.333	0.177
	150	0.162	0.164	0.199	0.183	0.164	0.187	0.185	0.162	0.15	0.15	0.182	0.16	0.15	0.179	0.182	0.15	0.15	0.15	0.174	0.162	0.15	0.162	0.17	0.15	0.167	0.167	0.201	0.158	0.169	0.191	0.188	0.167	0.15	0.15	0.172	0.166	0.15	0.165	0.165	0.15	0.341	0.346	0.346	0.345	0.374	0.328	0.345	0.234
	200	0.2	0.2	0.255	0.205	0.2	0.241	0.241	0.2	0.2	0.2	0.235	0.242	0.2	0.225	0.233	0.2	0.2	0.2	0.23	0.208	0.2	0.22	0.224	0.2	0.2	0.2	0.256	0.206	0.2	0.24	0.243	0.2	0.2	0.2	0.225	0.2	0.2	0.22	0.22	0.2	0.354	0.353	0.352	0.356	0.386	0.354	0.356	0.295
	250	0.25	0.25	0.305	0.253	0.25	0.295	0.291	0.25	0.25	0.25	0.288	0.298	0.25	0.282	0.291	0.25	0.25	0.25	0.279	0.253	0.25	0.273	0.28	0.25	0.25	0.25	0.306	0.262	0.25	0.297	0.293	0.25	0.25	0.25	0.276	0.254	0.25	0.264	0.27	0.25	0.366	0.38	0.393	0.364	0.386	0.375	0.381	0.33
	300	0.3	0.3	0.351	0.312	0.3	0.347	0.339	0.3	0.3	0.3	0.336	0.349	0.3	0.336	0.339	0.3	0.3	0.3	0.332	0.318	0.3	0.323	0.333	0.3	0.3	0.3	0.351	0.305	0.3	0.348	0.34	0.3	0.3	0.3	0.329	0.307	0.3	0.32	0.322	0.3	0.372	0.394	0.425	0.373	0.408	0.436	0.403	0.355
	350	0.35	0.35	0.395	0.351	0.35	0.39	0.375	0.35	0.35	0.35	0.385	0.395	0.35	0.38	0.376	0.35	0.35	0.35	0.378	0.377	0.35	0.362	0.375	0.35	0.35	0.35	0.396	0.375	0.35	0.393	0.377	0.35	0.35	0.35	0.376	0.359	0.35	0.368	0.37	0.35	0.376	0.405	0.45	0.377	0.408	0.464	0.419	0.373
	400	0.4	0.4	0.435	0.431	0.4	0.431	0.4	0.4	0.4	0.4	0.422	0.415	0.4	0.423	0.4	0.4	0.4	0.4	0.414	0.417	0.4	0.422	0.4	0.4	0.4	0.4	0.435	0.429	0.4	0.433	0.4	0.4	0.4	0.4	0.415	0.4	0.4	0.418	0.4	0.4	0.406	0.408	0.472	0.402	0.408	0.495	0.432	0.406
	450	0.45	0.45	0.473	0.473	0.45	0.474	0.45	0.45	0.45	0.45	0.465	0.492	0.45	0.473	0.45	0.45	0.45	0.45	0.458	0.468	0.45	0.47	0.45	0.45	0.45	0.45	0.472	0.457	0.45	0.481	0.45	0.45	0.45	0.45	0.46	0.453	0.45	0.462	0.45	0.45	0.45	0.45	0.499	0.451	0.45	0.517	0.458	0.45
	500	0.5	0.5	0.513	0.503	0.5	0.516	0.5	0.5	0.5	0.5	0.51	0.521	0.5	0.511	0.5	0.5	0.5	0.5	0.502	0.502	0.5	0.509	0.5	0.5	0.5	0.5	0.512	0.511	0.5	0.517	0.5	0.5	0.5	0.5	0.504	0.506	0.5	0.509	0.5	0.5	0.5	0.5	0.519	0.505	0.5	0.533	0.5	0.5
500	50	0.053	0.093	0.087	0.06	0.053	0.068	0.073	0.063	0.071	0.077	0.07	0.056	0.071	0.061	0.065	0.073	0.073	0.074	0.065	0.056	0.077	0.057	0.059	0.075	0.054	0.091	0.087	0.082	0.106	0.071	0.067	0.068	0.067	0.067	0.06	0.054	0.067	0.055	0.051	0.067	0.246	0.249	0.244	0.244	0.26	0.081	0.249	0.095
	100	0.131	0.136	0.141	0.104	0.131	0.128	0.13	0.135	0.101	0.101	0.122	0.108	0.101	0.12	0.119	0.101	0.1	0.1	0.116	0.126	0.1	0.116	0.113	0.1	0.128	0.129	0.142	0.136	0.138	0.118	0.125	0.13	0.1	0.1	0.114	0.101	0.1	0.116	0.109	0.1	0.272	0.268	0.268	0.273	0.3	0.17	0.271	0.163
	150	0.15	0.15	0.196	0.164	0.15	0.182	0.187	0.15	0.15	0.15	0.175	0.153	0.15	0.172	0.176	0.15	0.15	0.15	0.171	0.151	0.15	0.163	0.169	0.15	0.15	0.15	0.195	0.157	0.15	0.178	0.185	0.15	0.15	0.15	0.169	0.152	0.15	0.167	0.164	0.15	0.283	0.285	0.289	0.284	0.312	0.258	0.291	0.217
	200	0.2	0.2	0.249	0.24	0.2	0.243	0.239	0.2	0.2	0.2	0.229	0.216	0.2	0.223	0.23	0.2	0.2	0.2	0.224	0.225	0.2	0.217	0.227	0.2	0.2	0.2	0.249	0.223	0.2	0.238	0.236	0.2	0.2	0.2	0.223	0.2	0.2	0.217	0.215	0.2	0.294	0.312	0.335	0.293	0.336	0.33	0.321	0.263
	250	0.25	0.25	0.298	0.257	0.25	0.294	0.287	0.25	0.25	0.25	0.28	0.263	0.25	0.277	0.283	0.25	0.25	0.25	0.278	0.264	0.25	0.272	0.28	0.25	0.25	0.25	0.298	0.267	0.25	0.288	0.285	0.25	0.25	0.25	0.273	0.251	0.25	0.267	0.267	0.25	0.3	0.328	0.366	0.3	0.336	0.374	0.35	0.287
	300	0.3	0.3	0.344	0.311	0.3	0.334	0.324	0.3	0.3	0.3	0.33	0.339	0.3	0.326	0.326	0.3	0.3	0.3	0.325	0.303	0.3	0.322	0.325	0.3	0.3	0.3	0.342	0.319	0.3	0.336	0.325	0.3	0.3	0.3	0.325	0.302	0.3	0.316	0.316	0.3	0.306	0.335	0.391	0.306	0.336	0.41	0.366	0.306
	350	0.35	0.35	0.386	0.371	0.35	0.381	0.35	0.35	0.35	0.35	0.368	0.382	0.35	0.369	0.35	0.35	0.35	0.35	0.363	0.354	0.35	0.37	0.35	0.35	0.35	0.35	0.382	0.378	0.35	0.38	0.35	0.35	0.35	0.35	0.366	0.358	0.35	0.361	0.35	0.35	0.35	0.35	0.423	0.359	0.35	0.435	0.385	0.35
	400	0.4	0.4	0.422	0.414	0.4	0.421	0.4	0.4	0.4	0.4	0.413	0.405	0.4	0.416	0.4	0.4	0.4	0.4	0.407	0.419	0.4	0.414	0.4	0.4	0.4	0.4	0.419	0.433	0.4	0.422	0.4	0.4	0.4	0.4	0.409	0.402	0.4	0.413	0.4	0.4	0.4	0.4	0.446	0.407	0.4	0.452	0.408	0.4
	450	0.45	0.45	0.461	0.453	0.45	0.462	0.45	0.45	0.45	0.45	0.46	0.489	0.45	0.458	0.45	0.45	0.45	0.45	0.452	0.451	0.45	0.454	0.45	0.45	0.45	0.45	0.461	0.458	0.45	0.464	0.45	0.45	0.45	0.45	0.454	0.453	0.45	0.457	0.45	0.45	0.45	0.45	0.469	0.453	0.45	0.483	0.45	0.45
	500	0.5	0.5	0.5	0.5	0.5	0.5	0.5	0.5	0.5	0.5	0.5	0.5	0.5	0.5	0.5	0.5	0.5	0.5	0.5	0.5	0.5	0.5	0.5	0.5	0.5	0.5	0.5	0.5	0.5	0.5	0.5	0.5	0.5	0.5	0.5	0.5	0.5	0.5	0.5	0.5	0.5	0.5	0.5	0.5	0.5	0.5	0.5	0.5
[truncated: 17 more columns]

## Sheet: 2.3
kb	ks	CC-CC	CC-H_index	CC-K_shell	CC-EC	CC-LR	CC-R	CC-LC	CC-ECC	H_index-CC	H_index-H_index	H_index-K_shell	H_index-EC	H_index-LR	H_index-R	H_index-LC	H_index-ECC	K_shell-CC	K_shell-H_index	K_shell-K_shell	K_shell-EC	K_shell-LR	K_shell-R	K_shell-LC	K_shell-ECC	EC-CC	EC-H_index	EC-K_shell	EC-EC	EC-LR	EC-R	EC-LC	EC-ECC	LR-CC	LR-H_index	LR-K_shell	LR-EC	LR-LR	LR-R	LR-LC	LR-ECC	R-CC	R-H_index	R-K_shell	R-EC	R-LR	R-R	R-LC	R-ECC
50	50	0.2	0.227	0.211	0.161	0.29	0.132	0.175	0.075	0.189	0.22	0.203	0.161	0.289	0.114	0.175	0.078	0.187	0.225	0.211	0.178	0.289	0.114	0.18	0.082	0.202	0.221	0.208	0.176	0.285	0.131	0.172	0.077	0.158	0.204	0.194	0.151	0.257	0.112	0.167	0.083	0.484	0.486	0.478	0.482	0.51	0.23	0.483	0.091
	100	0.29	0.345	0.339	0.257	0.406	0.238	0.277	0.146	0.289	0.341	0.331	0.255	0.405	0.209	0.272	0.153	0.302	0.335	0.341	0.267	0.408	0.218	0.282	0.15	0.285	0.336	0.334	0.265	0.399	0.225	0.277	0.152	0.269	0.314	0.312	0.236	0.385	0.201	0.258	0.149	0.534	0.555	0.557	0.542	0.59	0.291	0.54	0.195
	150	0.355	0.407	0.399	0.327	0.479	0.301	0.37	0.23	0.35	0.412	0.401	0.314	0.476	0.317	0.365	0.225	0.359	0.405	0.404	0.331	0.479	0.302	0.374	0.23	0.334	0.4	0.394	0.312	0.469	0.318	0.371	0.227	0.328	0.386	0.37	0.311	0.454	0.309	0.345	0.211	0.571	0.598	0.599	0.565	0.64	0.37	0.565	0.301
	200	0.405	0.449	0.433	0.36	0.51	0.375	0.438	0.299	0.39	0.457	0.43	0.365	0.51	0.395	0.435	0.301	0.403	0.458	0.443	0.395	0.513	0.405	0.441	0.286	0.375	0.444	0.427	0.364	0.503	0.413	0.438	0.293	0.367	0.43	0.408	0.36	0.489	0.392	0.414	0.275	0.596	0.63	0.627	0.593	0.674	0.504	0.595	0.375
	250	0.436	0.488	0.458	0.408	0.566	0.451	0.491	0.357	0.423	0.494	0.456	0.409	0.566	0.466	0.489	0.367	0.432	0.485	0.474	0.426	0.562	0.462	0.495	0.346	0.42	0.48	0.452	0.405	0.555	0.457	0.492	0.347	0.42	0.47	0.427	0.403	0.54	0.454	0.47	0.336	0.616	0.656	0.652	0.611	0.699	0.541	0.612	0.446
	300	0.461	0.519	0.511	0.446	0.594	0.516	0.545	0.425	0.449	0.519	0.515	0.454	0.59	0.518	0.542	0.413	0.468	0.518	0.499	0.449	0.586	0.531	0.548	0.401	0.447	0.513	0.505	0.438	0.583	0.532	0.548	0.418	0.44	0.501	0.502	0.438	0.568	0.521	0.526	0.373	0.634	0.681	0.678	0.631	0.716	0.603	0.631	0.493
	350	0.486	0.55	0.575	0.476	0.602	0.602	0.594	0.477	0.486	0.554	0.578	0.488	0.601	0.585	0.592	0.452	0.493	0.544	0.565	0.477	0.593	0.574	0.598	0.439	0.478	0.545	0.57	0.471	0.592	0.568	0.596	0.464	0.464	0.532	0.566	0.467	0.578	0.578	0.576	0.435	0.647	0.694	0.693	0.647	0.727	0.659	0.651	0.568
	400	0.505	0.578	0.618	0.501	0.606	0.644	0.634	0.508	0.504	0.578	0.618	0.508	0.604	0.657	0.632	0.495	0.507	0.575	0.611	0.498	0.598	0.649	0.639	0.486	0.497	0.575	0.609	0.501	0.6	0.641	0.637	0.502	0.488	0.56	0.601	0.487	0.595	0.625	0.619	0.473	0.67	0.705	0.702	0.667	0.741	0.687	0.674	0.613
	450	0.515	0.607	0.646	0.519	0.658	0.684	0.669	0.536	0.526	0.61	0.65	0.53	0.66	0.679	0.667	0.535	0.529	0.6	0.64	0.522	0.654	0.68	0.674	0.513	0.51	0.605	0.644	0.519	0.656	0.686	0.672	0.536	0.509	0.592	0.634	0.515	0.641	0.659	0.655	0.513	0.689	0.716	0.713	0.69	0.748	0.761	0.688	0.653
	500	0.545	0.629	0.677	0.546	0.658	0.724	0.707	0.562	0.549	0.629	0.68	0.545	0.66	0.726	0.699	0.565	0.554	0.623	0.671	0.549	0.654	0.711	0.708	0.542	0.538	0.627	0.674	0.54	0.656	0.732	0.709	0.552	0.532	0.613	0.667	0.534	0.641	0.731	0.697	0.533	0.705	0.72	0.716	0.704	0.751	0.781	0.706	0.678
100	50	0.142	0.2	0.203	0.111	0.263	0.12	0.133	0.07	0.091	0.171	0.145	0.09	0.23	0.118	0.12	0.066	0.128	0.175	0.18	0.111	0.235	0.116	0.121	0.074	0.134	0.193	0.194	0.098	0.25	0.108	0.126	0.068	0.089	0.151	0.091	0.077	0.202	0.105	0.104	0.061	0.427	0.428	0.427	0.424	0.455	0.205	0.429	0.097
	100	0.22	0.294	0.281	0.196	0.366	0.205	0.241	0.139	0.164	0.26	0.191	0.156	0.329	0.184	0.204	0.118	0.194	0.269	0.238	0.193	0.339	0.198	0.211	0.14	0.205	0.286	0.265	0.167	0.338	0.216	0.236	0.14	0.16	0.236	0.181	0.125	0.293	0.193	0.183	0.116	0.479	0.499	0.5	0.483	0.532	0.264	0.483	0.186
	150	0.274	0.36	0.329	0.247	0.416	0.275	0.324	0.203	0.2	0.314	0.269	0.207	0.409	0.272	0.291	0.179	0.251	0.326	0.274	0.253	0.401	0.276	0.295	0.207	0.266	0.358	0.311	0.249	0.411	0.297	0.32	0.194	0.196	0.276	0.272	0.183	0.396	0.245	0.272	0.173	0.51	0.546	0.536	0.515	0.59	0.344	0.505	0.282
	200	0.331	0.396	0.368	0.295	0.482	0.392	0.391	0.254	0.252	0.361	0.36	0.248	0.457	0.368	0.359	0.231	0.299	0.368	0.362	0.296	0.457	0.34	0.361	0.247	0.317	0.396	0.367	0.302	0.437	0.362	0.385	0.25	0.236	0.336	0.351	0.241	0.416	0.354	0.345	0.233	0.529	0.571	0.569	0.532	0.621	0.445	0.548	0.365
	250	0.355	0.434	0.447	0.352	0.501	0.44	0.454	0.319	0.297	0.412	0.429	0.293	0.471	0.413	0.42	0.279	0.323	0.414	0.435	0.334	0.472	0.425	0.425	0.301	0.36	0.432	0.446	0.341	0.465	0.462	0.45	0.306	0.274	0.385	0.425	0.276	0.424	0.4	0.404	0.271	0.553	0.603	0.605	0.554	0.65	0.521	0.568	0.418
	300	0.387	0.472	0.511	0.382	0.514	0.469	0.511	0.359	0.33	0.443	0.485	0.332	0.477	0.481	0.486	0.314	0.362	0.453	0.486	0.36	0.478	0.48	0.488	0.35	0.387	0.469	0.511	0.377	0.509	0.508	0.508	0.36	0.31	0.43	0.467	0.306	0.496	0.469	0.46	0.306	0.574	0.623	0.626	0.576	0.659	0.577	0.594	0.468
	350	0.417	0.509	0.544	0.412	0.552	0.555	0.557	0.406	0.354	0.485	0.526	0.353	0.549	0.53	0.537	0.359	0.389	0.492	0.528	0.387	0.544	0.547	0.539	0.382	0.409	0.505	0.542	0.407	0.515	0.548	0.552	0.405	0.372	0.469	0.51	0.364	0.528	0.519	0.51	0.36	0.601	0.637	0.635	0.599	0.677	0.626	0.615	0.532
	400	0.436	0.536	0.578	0.437	0.584	0.597	0.598	0.438	0.409	0.519	0.559	0.412	0.555	0.593	0.583	0.404	0.415	0.522	0.561	0.414	0.556	0.587	0.583	0.416	0.432	0.528	0.576	0.432	0.515	0.604	0.592	0.441	0.424	0.499	0.545	0.43	0.528	0.576	0.558	0.415	0.618	0.647	0.646	0.615	0.688	0.666	0.634	0.575
	450	0.463	0.557	0.613	0.462	0.584	0.649	0.642	0.467	0.475	0.542	0.594	0.479	0.555	0.64	0.627	0.461	0.457	0.543	0.597	0.47	0.556	0.634	0.628	0.457	0.467	0.549	0.609	0.466	0.515	0.648	0.637	0.468	0.468	0.518	0.582	0.48	0.528	0.623	0.606	0.478	0.637	0.656	0.66	0.638	0.691	0.741	0.649	0.617
	500	0.514	0.576	0.65	0.514	0.584	0.676	0.659	0.505	0.521	0.551	0.635	0.532	0.555	0.679	0.655	0.529	0.516	0.554	0.64	0.505	0.556	0.679	0.658	0.522	0.512	0.567	0.647	0.514	0.529	0.679	0.659	0.504	0.52	0.528	0.622	0.539	0.528	0.674	0.64	0.522	0.654	0.67	0.697	0.65	0.709	0.753	0.669	0.639
150	50	0.108	0.16	0.139	0.111	0.216	0.1	0.116	0.068	0.076	0.142	0.099	0.069	0.202	0.097	0.08	0.063	0.072	0.149	0.098	0.057	0.181	0.083	0.079	0.058	0.122	0.159	0.152	0.102	0.215	0.111	0.115	0.066	0.074	0.12	0.108	0.054	0.164	0.082	0.078	0.054	0.4	0.406	0.403	0.401	0.427	0.13	0.406	0.094
	100	0.171	0.246	0.193	0.186	0.312	0.197	0.207	0.13	0.126	0.211	0.2	0.129	0.309	0.182	0.177	0.113	0.117	0.228	0.208	0.113	0.256	0.162	0.177	0.106	0.175	0.256	0.221	0.18	0.293	0.198	0.207	0.126	0.158	0.191	0.203	0.118	0.276	0.162	0.164	0.122	0.453	0.47	0.466	0.452	0.506	0.301	0.455	0.183
	150	0.222	0.293	0.283	0.24	0.389	0.256	0.282	0.187	0.164	0.276	0.286	0.185	0.355	0.243	0.255	0.153	0.158	0.282	0.294	0.154	0.293	0.253	0.256	0.157	0.224	0.31	0.276	0.224	0.346	0.263	0.287	0.18	0.203	0.256	0.288	0.2	0.3	0.235	0.234	0.177	0.485	0.504	0.497	0.48	0.55	0.372	0.479	0.276
	200	0.261	0.348	0.359	0.271	0.42	0.341	0.353	0.242	0.22	0.324	0.366	0.25	0.371	0.311	0.321	0.205	0.243	0.327	0.367	0.24	0.368	0.326	0.318	0.214	0.265	0.346	0.351	0.267	0.375	0.337	0.36	0.242	0.245	0.315	0.342	0.215	0.37	0.294	0.301	0.224	0.504	0.542	0.543	0.508	0.592	0.473	0.519	0.355
	250	0.297	0.386	0.431	0.299	0.43	0.404	0.415	0.285	0.283	0.377	0.413	0.302	0.427	0.398	0.391	0.265	0.292	0.371	0.407	0.289	0.37	0.39	0.388	0.275	0.294	0.384	0.419	0.3	0.415	0.408	0.426	0.302	0.3	0.363	0.389	0.29	0.42	0.373	0.359	0.28	0.529	0.568	0.573	0.526	0.603	0.488	0.541	0.418
	300	0.33	0.426	0.465	0.332	0.49	0.468	0.473	0.325	0.33	0.413	0.451	0.382	0.473	0.451	0.454	0.318	0.319	0.415	0.445	0.36	0.37	0.452	0.451	0.316	0.334	0.423	0.461	0.338	0.432	0.468	0.477	0.337	0.3	0.394	0.431	0.335	0.436	0.416	0.422	0.328	0.546	0.588	0.586	0.545	0.63	0.546	0.561	0.468
	350	0.361	0.462	0.502	0.362	0.508	0.532	0.518	0.357	0.371	0.441	0.485	0.405	0.475	0.479	0.505	0.366	0.37	0.439	0.482	0.375	0.37	0.509	0.504	0.364	0.365	0.461	0.498	0.371	0.432	0.527	0.522	0.372	0.382	0.419	0.473	0.416	0.436	0.487	0.475	0.388	0.569	0.603	0.6	0.566	0.64	0.587	0.583	0.508
	400	0.418	0.486	0.538	0.431	0.508	0.566	0.566	0.411	0.417	0.464	0.528	0.466	0.475	0.552	0.552	0.433	0.418	0.458	0.525	0.444	0.434	0.55	0.552	0.426	0.408	0.485	0.535	0.411	0.432	0.559	0.569	0.404	0.426	0.435	0.522	0.443	0.436	0.538	0.525	0.426	0.587	0.609	0.605	0.586	0.645	0.623	0.597	0.559
	450	0.462	0.507	0.579	0.487	0.508	0.611	0.597	0.472	0.469	0.475	0.572	0.514	0.475	0.599	0.588	0.471	0.466	0.466	0.568	0.512	0.466	0.599	0.587	0.466	0.464	0.502	0.577	0.461	0.48	0.611	0.601	0.472	0.45	0.45	0.563	0.55	0.45	0.584	0.564	0.45	0.602	0.621	0.65	0.601	0.654	0.684	0.62	0.589
	500	0.508	0.508	0.617	0.516	0.508	0.642	0.623	0.508	0.5	0.5	0.615	0.611	0.5	0.634	0.618	0.5	0.5	0.5	0.611	0.54	0.5	0.642	0.616	0.5	0.502	0.502	0.617	0.511	0.502	0.655	0.625	0.502	0.5	0.5	0.607	0.538	0.5	0.623	0.6	0.5	0.617	0.639	0.671	0.616	0.66	0.71	0.638	0.609
200	50	0.098	0.141	0.133	0.104	0.185	0.097	0.117	0.075	0.1	0.111	0.106	0.053	0.137	0.087	0.078	0.061	0.066	0.115	0.096	0.073	0.14	0.089	0.071	0.055	0.1	0.142	0.132	0.1	0.182	0.105	0.103	0.068	0.08	0.096	0.103	0.064	0.109	0.068	0.066	0.061	0.381	0.384	0.376	0.381	0.399	0.136	0.387	0.095
	100	0.163	0.226	0.192	0.17	0.285	0.191	0.2	0.127	0.136	0.187	0.198	0.136	0.204	0.167	0.16	0.117	0.132	0.184	0.191	0.117	0.193	0.166	0.159	0.111	0.148	0.222	0.191	0.158	0.269	0.188	0.191	0.128	0.145	0.167	0.205	0.113	0.199	0.147	0.139	0.128	0.431	0.442	0.441	0.429	0.463	0.257	0.431	0.178
	150	0.212	0.274	0.276	0.21	0.31	0.282	0.276	0.187	0.182	0.247	0.28	0.188	0.269	0.224	0.23	0.163	0.19	0.247	0.275	0.192	0.272	0.247	0.23	0.171	0.204	0.271	0.275	0.202	0.295	0.256	0.269	0.181	0.199	0.235	0.26	0.182	0.199	0.213	0.205	0.177	0.456	0.473	0.474	0.453	0.508	0.329	0.461	0.276
	200	0.246	0.318	0.352	0.242	0.352	0.33	0.343	0.235	0.236	0.306	0.334	0.241	0.269	0.294	0.296	0.227	0.233	0.302	0.328	0.234	0.272	0.301	0.298	0.22	0.244	0.317	0.347	0.235	0.342	0.334	0.339	0.229	0.201	0.286	0.304	0.222	0.201	0.284	0.271	0.239	0.473	0.514	0.51	0.475	0.525	0.454	0.487	0.347
	250	0.278	0.365	0.404	0.277	0.385	0.403	0.401	0.277	0.269	0.349	0.38	0.272	0.269	0.356	0.362	0.267	0.272	0.351	0.373	0.293	0.272	0.365	0.365	0.266	0.27	0.362	0.393	0.269	0.367	0.385	0.397	0.269	0.283	0.316	0.347	0.299	0.283	0.35	0.33	0.297	0.493	0.536	0.537	0.494	0.559	0.479	0.512	0.409
	300	0.303	0.402	0.445	0.303	0.385	0.44	0.45	0.304	0.321	0.381	0.423	0.379	0.331	0.41	0.42	0.341	0.322	0.377	0.418	0.349	0.326	0.421	0.421	0.336	0.306	0.401	0.436	0.304	0.367	0.448	0.447	0.302	0.331	0.346	0.398	0.325	0.331	0.409	0.387	0.337	0.517	0.553	0.549	0.512	0.563	0.542	0.532	0.456
	350	0.37	0.436	0.483	0.374	0.385	0.515	0.501	0.362	0.381	0.4	0.473	0.364	0.385	0.465	0.475	0.385	0.376	0.396	0.466	0.416	0.38	0.455	0.476	0.38	0.367	0.43	0.474	0.368	0.367	0.499	0.497	0.359	0.351	0.351	0.449	0.398	0.351	0.459	0.443	0.351	0.538	0.564	0.559	0.534	0.573	0.594	0.551	0.491
	400	0.409	0.458	0.525	0.429	0.415	0.555	0.535	0.425	0.403	0.403	0.514	0.434	0.403	0.528	0.513	0.403	0.4	0.4	0.509	0.455	0.4	0.518	0.514	0.4	0.421	0.448	0.52	0.407	0.425	0.534	0.532	0.431	0.4	0.4	0.49	0.469	0.4	0.501	0.485	0.4	0.554	0.574	0.597	0.555	0.597	0.62	0.568	0.533
	450	0.459	0.459	0.565	0.464	0.459	0.582	0.566	0.459	0.45	0.45	0.556	0.476	0.45	0.568	0.549	0.45	0.45	0.45	0.55	0.496	0.45	0.56	0.549	0.45	0.45	0.45	0.561	0.486	0.45	0.591	0.565	0.45	0.45	0.45	0.536	0.491	0.45	0.541	0.528	0.45	0.569	0.587	0.619	0.564	0.602	0.669	0.59	0.559
	500	0.5	0.5	0.601	0.536	0.5	0.623	0.585	0.5	0.5	0.5	0.6	0.52	0.5	0.603	0.568	0.5	0.5	0.5	0.596	0.53	0.5	0.6	0.57	0.5	0.5	0.5	0.6	0.515	0.5	0.626	0.585	0.5	0.5	0.5	0.583	0.515	0.5	0.602	0.561	0.5	0.577	0.597	0.645	0.576	0.602	0.688	0.602	0.578
250	50	0.084	0.135	0.101	0.095	0.159	0.073	0.089	0.07	0.083	0.105	0.113	0.054	0.107	0.079	0.071	0.06	0.078	0.105	0.104	0.065	0.118	0.077	0.079	0.063	0.094	0.138	0.111	0.088	0.167	0.092	0.1	0.069	0.093	0.09	0.107	0.057	0.114	0.07	0.057	0.07	0.351	0.362	0.353	0.355	0.375	0.153	0.359	0.102
	100	0.139	0.188	0.184	0.138	0.223	0.173	0.175	0.127	0.13	0.176	0.205	0.11	0.196	0.16	0.147	0.117	0.141	0.178	0.195	0.121	0.178	0.148	0.157	0.118	0.142	0.204	0.193	0.145	0.242	0.171	0.185	0.125	0.114	0.163	0.174	0.113	0.196	0.136	0.122	0.116	0.4	0.414	0.407	0.395	0.45	0.221	0.397	0.182
	150	0.177	0.244	0.267	0.164	0.27	0.247	0.253	0.174	0.196	0.236	0.264	0.2	0.196	0.222	0.214	0.174	0.181	0.243	0.259	0.175	0.217	0.224	0.219	0.168	0.182	0.252	0.273	0.171	0.276	0.241	0.261	0.174	0.176	0.217	0.224	0.157	0.244	0.2	0.185	0.194	0.418	0.445	0.449	0.418	0.485	0.331	0.425	0.271
	200	0.206	0.297	0.329	0.205	0.319	0.303	0.322	0.206	0.204	0.277	0.309	0.227	0.204	0.288	0.28	0.24	0.217	0.292	0.308	0.213	0.217	0.28	0.289	0.213	0.215	0.301	0.336	0.213	0.327	0.332	0.327	0.21	0.238	0.245	0.273	0.212	0.268	0.261	0.246	0.242	0.44	0.481	0.483	0.44	0.504	0.427	0.454	0.334
	250	0.26	0.341	0.372	0.265	0.319	0.38	0.38	0.254	0.28	0.31	0.357	0.276	0.28	0.337	0.34	0.294	0.273	0.321	0.35	0.282	0.273	0.346	0.349	0.287	0.265	0.344	0.379	0.255	0.327	0.384	0.382	0.258	0.268	0.268	0.327	0.278	0.268	0.312	0.303	0.268	0.455	0.5	0.501	0.454	0.537	0.457	0.479	0.391
	300	0.319	0.377	0.412	0.324	0.319	0.44	0.433	0.312	0.324	0.332	0.407	0.344	0.324	0.395	0.399	0.328	0.325	0.34	0.403	0.308	0.325	0.395	0.404	0.327	0.327	0.379	0.418	0.313	0.327	0.431	0.435	0.31	0.3	0.3	0.378	0.324	0.3	0.365	0.366	0.3	0.478	0.509	0.509	0.477	0.547	0.528	0.496	0.43
	350	0.367	0.391	0.454	0.366	0.369	0.47	0.474	0.377	0.35	0.35	0.449	0.361	0.35	0.452	0.441	0.35	0.35	0.35	0.45	0.388	0.35	0.454	0.445	0.35	0.367	0.401	0.462	0.376	0.371	0.474	0.474	0.375	0.35	0.35	0.425	0.374	0.35	0.423	0.407	0.35	0.501	0.519	0.537	0.496	0.548	0.568	0.511	0.473
	400	0.4	0.4	0.496	0.442	0.4	0.536	0.51	0.4	0.4	0.4	0.49	0.453	0.4	0.499	0.483	0.4	0.4	0.4	0.492	0.428	0.4	0.505	0.485	0.4	0.403	0.403	0.503	0.434	0.403	0.511	0.509	0.403	0.4	0.4	0.475	0.474	0.4	0.472	0.457	0.4	0.517	0.532	0.565	0.511	0.562	0.604	0.533	0.497
	450	0.45	0.45	0.534	0.458	0.45	0.565	0.535	0.45	0.45	0.45	0.532	0.508	0.45	0.539	0.512	0.45	0.45	0.45	0.538	0.492	0.45	0.545	0.515	0.45	0.45	0.45	0.539	0.484	0.45	0.562	0.535	0.45	0.45	0.45	0.522	0.475	0.45	0.513	0.501	0.45	0.524	0.545	0.593	0.525	0.562	0.628	0.555	0.52
	500	0.5	0.5	0.58	0.537	0.5	0.605	0.546	0.5	0.5	0.5	0.574	0.515	0.5	0.592	0.544	0.5	0.5	0.5	0.566	0.533	0.5	0.587	0.545	0.5	0.5	0.5	0.588	0.527	0.5	0.62	0.546	0.5	0.5	0.5	0.557	0.529	0.5	0.565	0.539	0.5	0.535	0.558	0.624	0.535	0.562	0.656	0.571	0.535
300	50	0.085	0.123	0.091	0.083	0.157	0.085	0.087	0.067	0.083	0.098	0.114	0.059	0.111	0.066	0.075	0.07	0.084	0.093	0.118	0.053	0.136	0.071	0.08	0.068	0.083	0.13	0.092	0.085	0.173	0.115	0.092	0.071	0.075	0.087	0.099	0.077	0.111	0.068	0.062	0.067	0.323	0.331	0.335	0.326	0.349	0.119	0.328	0.095
	100	0.124	0.173	0.177	0.121	0.204	0.154	0.174	0.121	0.138	0.168	0.188	0.112	0.138	0.146	0.134	0.119	0.141	0.167	0.187	0.116	0.207	0.139	0.14	0.121	0.129	0.174	0.178	0.126	0.26	0.173	0.178	0.122	0.119	0.156	0.158	0.103	0.185	0.128	0.117	0.143	0.365	0.382	0.381	0.361	0.412	0.238	0.359	0.182
	150	0.16	0.226	0.265	0.159	0.258	0.23	0.245	0.157	0.162	0.22	0.235	0.169	0.162	0.196	0.198	0.188	0.159	0.223	0.235	0.167	0.257	0.2	0.201	0.189	0.162	0.226	0.268	0.159	0.272	0.247	0.249	0.157	0.187	0.194	0.21	0.189	0.221	0.194	0.177	0.191	0.385	0.418	0.416	0.389	0.448	0.294	0.399	0.26
	200	0.229	0.281	0.307	0.213	0.27	0.312	0.312	0.211	0.23	0.254	0.285	0.218	0.23	0.268	0.259	0.242	0.231	0.251	0.284	0.215	0.275	0.269	0.258	0.241	0.226	0.287	0.309	0.204	0.34	0.307	0.314	0.211	0.221	0.221	0.261	0.228	0.221	0.247	0.233	0.221	0.406	0.443	0.441	0.409	0.473	0.366	0.417	0.324
	250	0.27	0.319	0.348	0.285	0.27	0.363	0.366	0.26	0.272	0.277	0.337	0.267	0.272	0.326	0.325	0.276	0.271	0.275	0.338	0.267	0.275	0.317	0.323	0.273	0.272	0.324	0.353	0.271	0.352	0.361	0.368	0.261	0.25	0.25	0.315	0.278	0.25	0.297	0.297	0.25	0.426	0.455	0.452	0.424	0.492	0.436	0.441	0.369
	300	0.318	0.345	0.398	0.312	0.318	0.41	0.408	0.324	0.3	0.3	0.387	0.324	0.3	0.386	0.37	0.3	0.3	0.3	0.385	0.309	0.3	0.375	0.372	0.3	0.32	0.349	0.399	0.31	0.352	0.408	0.411	0.326	0.3	0.3	0.363	0.34	0.3	0.366	0.35	0.3	0.441	0.465	0.475	0.438	0.495	0.49	0.467	0.418
	350	0.35	0.35	0.435	0.357	0.35	0.464	0.446	0.35	0.35	0.35	0.43	0.404	0.35	0.433	0.418	0.35	0.35	0.35	0.431	0.391	0.35	0.43	0.418	0.35	0.352	0.352	0.441	0.377	0.352	0.454	0.448	0.352	0.35	0.35	0.411	0.38	0.35	0.404	0.404	0.35	0.456	0.478	0.508	0.455	0.509	0.536	0.482	0.443
	400	0.4	0.4	0.478	0.461	0.4	0.5	0.481	0.4	0.4	0.4	0.476	0.447	0.4	0.473	0.456	0.4	0.4	0.4	0.476	0.433	0.4	0.472	0.453	0.4	0.4	0.4	0.482	0.421	0.4	0.499	0.484	0.4	0.4	0.4	0.461	0.421	0.4	0.456	0.445	0.4	0.471	0.492	0.537	0.471	0.509	0.576	0.504	0.471
	450	0.45	0.45	0.522	0.49	0.45	0.543	0.496	0.45	0.45	0.45	0.509	0.471	0.45	0.523	0.492	0.45	0.45	0.45	0.509	0.485	0.45	0.516	0.491	0.45	0.45	0.45	0.525	0.483	0.45	0.539	0.496	0.45	0.45	0.45	0.498	0.493	0.45	0.503	0.486	0.45	0.481	0.501	0.569	0.481	0.509	0.613	0.525	0.488
	500	0.5	0.5	0.562	0.531	0.5	0.579	0.501	0.5	0.5	0.5	0.554	0.53	0.5	0.558	0.501	0.5	0.5	0.5	0.553	0.544	0.5	0.558	0.501	0.5	0.5	0.5	0.563	0.528	0.5	0.58	0.501	0.5	0.5	0.5	0.545	0.519	0.5	0.543	0.501	0.5	0.501	0.509	0.601	0.5	0.509	0.62	0.543	0.503
350	50	0.069	0.114	0.101	0.06	0.163	0.08	0.101	0.061	0.092	0.09	0.106	0.068	0.118	0.069	0.073	0.071	0.055	0.087	0.087	0.076	0.055	0.06	0.058	0.067	0.069	0.115	0.102	0.061	0.149	0.088	0.099	0.061	0.054	0.086	0.083	0.07	0.102	0.062	0.057	0.066	0.299	0.308	0.306	0.297	0.326	0.138	0.299	0.089
	100	0.111	0.172	0.196	0.11	0.232	0.161	0.176	0.11	0.106	0.159	0.161	0.108	0.188	0.132	0.134	0.132	0.125	0.135	0.143	0.142	0.125	0.119	0.119	0.133	0.11	0.171	0.195	0.111	0.194	0.164	0.173	0.11	0.128	0.134	0.138	0.144	0.152	0.124	0.113	0.134	0.334	0.353	0.353	0.329	0.381	0.235	0.331	0.177
	150	0.174	0.23	0.25	0.164	0.278	0.227	0.246	0.158	0.18	0.199	0.214	0.182	0.224	0.186	0.193	0.192	0.171	0.171	0.194	0.182	0.171	0.189	0.176	0.171	0.172	0.231	0.25	0.157	0.231	0.234	0.244	0.157	0.162	0.162	0.192	0.187	0.162	0.185	0.171	0.162	0.357	0.389	0.389	0.358	0.413	0.307	0.365	0.239
	200	0.234	0.276	0.295	0.24	0.312	0.288	0.305	0.216	0.22	0.224	0.27	0.22	0.224	0.243	0.251	0.224	0.2	0.2	0.248	0.247	0.2	0.247	0.232	0.2	0.231	0.274	0.294	0.219	0.231	0.286	0.301	0.212	0.2	0.2	0.246	0.235	0.2	0.237	0.227	0.2	0.378	0.408	0.406	0.374	0.444	0.379	0.392	0.308
	250	0.264	0.302	0.342	0.277	0.312	0.338	0.351	0.278	0.25	0.25	0.323	0.28	0.25	0.319	0.304	0.25	0.25	0.25	0.297	0.271	0.25	0.296	0.29	0.25	0.267	0.3	0.343	0.271	0.271	0.341	0.348	0.277	0.25	0.25	0.299	0.268	0.25	0.293	0.286	0.25	0.395	0.422	0.42	0.392	0.454	0.415	0.415	0.351
	300	0.312	0.312	0.387	0.319	0.312	0.403	0.39	0.312	0.3	0.3	0.37	0.367	0.3	0.377	0.359	0.3	0.3	0.3	0.346	0.339	0.3	0.35	0.348	0.3	0.309	0.309	0.387	0.322	0.309	0.392	0.387	0.309	0.3	0.3	0.346	0.321	0.3	0.35	0.337	0.3	0.41	0.436	0.46	0.41	0.466	0.467	0.439	0.393
	350	0.35	0.35	0.427	0.381	0.35	0.442	0.43	0.35	0.35	0.35	0.416	0.421	0.35	0.399	0.397	0.35	0.35	0.35	0.395	0.378	0.35	0.39	0.393	0.35	0.35	0.35	0.428	0.373	0.35	0.443	0.43	0.35	0.35	0.35	0.394	0.366	0.35	0.383	0.383	0.35	0.423	0.446	0.488	0.42	0.466	0.515	0.458	0.42
	400	0.4	0.4	0.465	0.428	0.4	0.481	0.446	0.4	0.4	0.4	0.451	0.425	0.4	0.459	0.435	0.4	0.4	0.4	0.436	0.427	0.4	0.447	0.437	0.4	0.4	0.4	0.466	0.43	0.4	0.485	0.446	0.4	0.4	0.4	0.438	0.413	0.4	0.445	0.43	0.4	0.439	0.455	0.518	0.436	0.466	0.546	0.481	0.445
	450	0.45	0.45	0.507	0.468	0.45	0.53	0.451	0.45	0.45	0.45	0.496	0.481	0.45	0.503	0.451	0.45	0.45	0.45	0.482	0.479	0.45	0.485	0.451	0.45	0.45	0.45	0.509	0.478	0.45	0.522	0.451	0.45	0.45	0.45	0.485	0.487	0.45	0.484	0.451	0.45	0.451	0.466	0.55	0.451	0.466	0.576	0.499	0.451
	500	0.5	0.5	0.549	0.526	0.5	0.562	0.5	0.5	0.5	0.5	0.539	0.525	0.5	0.538	0.5	0.5	0.5	0.5	0.528	0.512	0.5	0.526	0.5	0.5	0.5	0.5	0.549	0.523	0.5	0.561	0.5	0.5	0.5	0.5	0.531	0.514	0.5	0.524	0.5	0.5	0.5	0.5	0.571	0.505	0.5	0.595	0.515	0.5
400	50	0.066	0.1	0.105	0.05	0.115	0.068	0.091	0.05	0.056	0.086	0.09	0.064	0.056	0.062	0.066	0.066	0.063	0.081	0.075	0.055	0.095	0.061	0.057	0.077	0.07	0.101	0.106	0.052	0.121	0.068	0.092	0.052	0.073	0.075	0.067	0.054	0.073	0.059	0.056	0.075	0.274	0.285	0.279	0.271	0.301	0.131	0.276	0.091
	100	0.132	0.159	0.184	0.132	0.18	0.156	0.167	0.117	0.124	0.136	0.144	0.144	0.124	0.125	0.12	0.132	0.121	0.127	0.129	0.156	0.139	0.115	0.116	0.127	0.131	0.163	0.189	0.112	0.184	0.138	0.167	0.117	0.105	0.105	0.121	0.114	0.105	0.114	0.111	0.105	0.3	0.331	0.325	0.302	0.355	0.221	0.303	0.177
	150	0.18	0.213	0.228	0.179	0.18	0.211	0.23	0.162	0.158	0.158	0.197	0.185	0.158	0.186	0.177	0.158	0.15	0.15	0.184	0.182	0.15	0.171	0.173	0.15	0.184	0.208	0.231	0.166	0.184	0.211	0.23	0.163	0.15	0.15	0.174	0.165	0.15	0.176	0.165	0.15	0.327	0.356	0.358	0.325	0.385	0.288	0.337	0.238
	200	0.218	0.244	0.271	0.239	0.22	0.278	0.279	0.226	0.2	0.2	0.248	0.239	0.2	0.228	0.237	0.2	0.2	0.2	0.241	0.235	0.2	0.236	0.231	0.2	0.214	0.242	0.27	0.212	0.218	0.273	0.282	0.222	0.2	0.2	0.229	0.203	0.2	0.228	0.219	0.2	0.355	0.372	0.371	0.353	0.412	0.347	0.364	0.297
	250	0.256	0.256	0.323	0.257	0.256	0.325	0.324	0.256	0.25	0.25	0.298	0.309	0.25	0.29	0.292	0.25	0.25	0.25	0.289	0.285	0.25	0.293	0.287	0.25	0.256	0.256	0.321	0.272	0.256	0.327	0.326	0.256	0.25	0.25	0.281	0.267	0.25	0.283	0.27	0.25	0.369	0.387	0.403	0.364	0.416	0.409	0.392	0.341
	300	0.3	0.3	0.362	0.319	0.3	0.384	0.368	0.3	0.3	0.3	0.349	0.306	0.3	0.34	0.34	0.3	0.3	0.3	0.34	0.327	0.3	0.332	0.336	0.3	0.3	0.3	0.361	0.329	0.3	0.378	0.372	0.3	0.3	0.3	0.33	0.321	0.3	0.327	0.32	0.3	0.378	0.402	0.436	0.377	0.43	0.465	0.407	0.371
	350	0.35	0.35	0.401	0.402	0.35	0.423	0.396	0.35	0.35	0.35	0.389	0.385	0.35	0.392	0.379	0.35	0.35	0.35	0.381	0.397	0.35	0.391	0.381	0.35	0.35	0.35	0.397	0.376	0.35	0.422	0.396	0.35	0.35	0.35	0.38	0.369	0.35	0.374	0.365	0.35	0.393	0.416	0.466	0.392	0.43	0.502	0.432	0.402
	400	0.4	0.4	0.446	0.424	0.4	0.465	0.401	0.4	0.4	0.4	0.441	0.41	0.4	0.439	0.401	0.4	0.4	0.4	0.427	0.416	0.4	0.424	0.401	0.4	0.4	0.4	0.443	0.442	0.4	0.459	0.401	0.4	0.4	0.4	0.423	0.412	0.4	0.421	0.401	0.4	0.407	0.429	0.497	0.407	0.43	0.509	0.453	0.409
	450	0.45	0.45	0.49	0.471	0.45	0.506	0.45	0.45	0.45	0.45	0.484	0.499	0.45	0.488	0.45	0.45	0.45	0.45	0.475	0.467	0.45	0.478	0.45	0.45	0.45	0.45	0.487	0.477	0.45	0.508	0.45	0.45	0.45	0.45	0.473	0.46	0.45	0.466	0.45	0.45	0.45	0.45	0.519	0.455	0.45	0.548	0.474	0.45
	500	0.5	0.5	0.525	0.517	0.5	0.537	0.5	0.5	0.5	0.5	0.526	0.516	0.5	0.526	0.5	0.5	0.5	0.5	0.522	0.516	0.5	0.514	0.5	0.5	0.5	0.5	0.526	0.511	0.5	0.532	0.5	0.5	0.5	0.5	0.518	0.512	0.5	0.511	0.5	0.5	0.5	0.5	0.55	0.505	0.5	0.563	0.5	0.5
450	50	0.063	0.088	0.098	0.059	0.13	0.079	0.082	0.054	0.069	0.072	0.073	0.05	0.069	0.06	0.057	0.077	0.07	0.075	0.071	0.065	0.07	0.061	0.054	0.078	0.067	0.087	0.098	0.056	0.136	0.071	0.084	0.054	0.071	0.07	0.061	0.054	0.071	0.054	0.055	0.073	0.243	0.249	0.249	0.24	0.269	0.113	0.239	0.086
	100	0.135	0.152	0.163	0.119	0.185	0.136	0.15	0.114	0.121	0.124	0.13	0.108	0.121	0.119	0.115	0.121	0.116	0.116	0.128	0.107	0.116	0.119	0.113	0.116	0.132	0.152	0.163	0.104	0.183	0.146	0.153	0.115	0.1	0.1	0.117	0.105	0.1	0.117	0.113	0.1	0.266	0.287	0.287	0.273	0.315	0.228	0.269	0.17
	150	0.161	0.191	0.209	0.171	0.209	0.208	0.205	0.173	0.15	0.15	0.184	0.178	0.15	0.173	0.175	0.15	0.15	0.15	0.183	0.154	0.15	0.171	0.173	0.15	0.157	0.19	0.212	0.169	0.207	0.205	0.207	0.171	0.15	0.15	0.171	0.158	0.15	0.17	0.166	0.15	0.289	0.312	0.312	0.293	0.357	0.286	0.303	0.238
	200	0.209	0.209	0.261	0.216	0.209	0.262	0.257	0.209	0.2	0.2	0.234	0.219	0.2	0.226	0.227	0.2	0.2	0.2	0.233	0.206	0.2	0.224	0.225	0.2	0.207	0.207	0.263	0.209	0.207	0.267	0.258	0.207	0.2	0.2	0.222	0.208	0.2	0.217	0.217	0.2	0.31	0.331	0.337	0.307	0.365	0.348	0.325	0.276
	250	0.25	0.25	0.304	0.285	0.25	0.316	0.306	0.25	0.25	0.25	0.286	0.259	0.25	0.283	0.285	0.25	0.25	0.25	0.285	0.252	0.25	0.279	0.281	0.25	0.25	0.25	0.303	0.267	0.25	0.318	0.306	0.25	0.25	0.25	0.274	0.251	0.25	0.27	0.269	0.25	0.324	0.35	0.377	0.323	0.381	0.374	0.354	0.311
	300	0.3	0.3	0.35	0.301	0.3	0.361	0.346	0.3	0.3	0.3	0.334	0.325	0.3	0.325	0.329	0.3	0.3	0.3	0.33	0.329	0.3	0.332	0.327	0.3	0.3	0.3	0.347	0.315	0.3	0.36	0.346	0.3	0.3	0.3	0.324	0.314	0.3	0.322	0.312	0.3	0.337	0.364	0.412	0.337	0.381	0.434	0.38	0.336
	350	0.35	0.35	0.389	0.371	0.35	0.4	0.351	0.35	0.35	0.35	0.386	0.361	0.35	0.378	0.351	0.35	0.35	0.35	0.377	0.362	0.35	0.382	0.351	0.35	0.35	0.35	0.389	0.397	0.35	0.412	0.351	0.35	0.35	0.35	0.371	0.383	0.35	0.367	0.351	0.35	0.352	0.377	0.445	0.352	0.381	0.463	0.404	0.352
	400	0.4	0.4	0.436	0.437	0.4	0.444	0.4	0.4	0.4	0.4	0.432	0.407	0.4	0.419	0.4	0.4	0.4	0.4	0.425	0.407	0.4	0.423	0.4	0.4	0.4	0.4	0.436	0.432	0.4	0.442	0.4	0.4	0.4	0.4	0.421	0.423	0.4	0.418	0.4	0.4	0.4	0.4	0.468	0.41	0.4	0.49	0.427	0.4
	450	0.45	0.45	0.477	0.468	0.45	0.487	0.45	0.45	0.45	0.45	0.475	0.465	0.45	0.466	0.45	0.45	0.45	0.45	0.472	0.477	0.45	0.468	0.45	0.45	0.45	0.45	0.477	0.457	0.45	0.482	0.45	0.45	0.45	0.45	0.467	0.46	0.45	0.462	0.45	0.45	0.45	0.45	0.498	0.453	0.45	0.508	0.45	0.45
	500	0.5	0.5	0.512	0.516	0.5	0.516	0.5	0.5	0.5	0.5	0.514	0.51	0.5	0.513	0.5	0.5	0.5	0.5	0.514	0.503	0.5	0.506	0.5	0.5	0.5	0.5	0.512	0.512	0.5	0.522	0.5	0.5	0.5	0.5	0.51	0.502	0.5	0.505	0.5	0.5	0.5	0.5	0.521	0.504	0.5	0.535	0.5	0.5
500	50	0.069	0.084	0.094	0.051	0.102	0.062	0.074	0.063	0.064	0.07	0.063	0.066	0.064	0.056	0.055	0.068	0.065	0.071	0.064	0.054	0.077	0.057	0.053	0.067	0.07	0.088	0.098	0.056	0.103	0.074	0.077	0.065	0.059	0.059	0.059	0.054	0.059	0.054	0.053	0.059	0.22	0.234	0.233	0.22	0.248	0.106	0.219	0.084
	100	0.112	0.138	0.143	0.107	0.16	0.138	0.132	0.122	0.1	0.1	0.12	0.101	0.1	0.115	0.111	0.1	0.1	0.1	0.121	0.104	0.1	0.112	0.111	0.1	0.107	0.138	0.146	0.111	0.163	0.133	0.136	0.119	0.1	0.1	0.115	0.118	0.1	0.117	0.106	0.1	0.244	0.261	0.258	0.246	0.274	0.211	0.248	0.165
	150	0.166	0.165	0.198	0.167	0.166	0.193	0.191	0.166	0.15	0.15	0.173	0.15	0.15	0.169	0.168	0.15	0.15	0.15	0.175	0.166	0.15	0.167	0.167	0.15	0.167	0.17	0.201	0.155	0.171	0.19	0.195	0.167	0.15	0.15	0.168	0.153	0.15	0.167	0.158	0.15	0.268	0.277	0.277	0.263	0.288	0.261	0.275	0.221
	200	0.2	0.2	0.244	0.228	0.2	0.25	0.242	0.2	0.2	0.2	0.224	0.2	0.2	0.222	0.223	0.2	0.2	0.2	0.226	0.203	0.2	0.212	0.222	0.2	0.2	0.2	0.246	0.221	0.2	0.246	0.246	0.2	0.2	0.2	0.221	0.2	0.2	0.217	0.211	0.2	0.282	0.304	0.324	0.277	0.321	0.328	0.301	0.264
	250	0.25	0.25	0.294	0.279	0.25	0.294	0.292	0.25	0.25	0.25	0.274	0.253	0.25	0.266	0.271	0.25	0.25	0.25	0.276	0.251	0.25	0.27	0.271	0.25	0.25	0.25	0.293	0.258	0.25	0.303	0.294	0.25	0.25	0.25	0.27	0.257	0.25	0.261	0.259	0.25	0.294	0.32	0.359	0.295	0.321	0.363	0.326	0.293
	300	0.3	0.3	0.337	0.308	0.3	0.34	0.301	0.3	0.3	0.3	0.321	0.332	0.3	0.327	0.301	0.3	0.3	0.3	0.322	0.301	0.3	0.325	0.301	0.3	0.3	0.3	0.336	0.308	0.3	0.336	0.301	0.3	0.3	0.3	0.317	0.303	0.3	0.318	0.301	0.3	0.307	0.334	0.389	0.307	0.321	0.406	0.355	0.308
	350	0.35	0.35	0.385	0.367	0.35	0.391	0.35	0.35	0.35	0.35	0.373	0.353	0.35	0.366	0.35	0.35	0.35	0.35	0.371	0.351	0.35	0.365	0.35	0.35	0.35	0.35	0.384	0.378	0.35	0.387	0.35	0.35	0.35	0.35	0.364	0.361	0.35	0.362	0.35	0.35	0.35	0.35	0.417	0.356	0.35	0.429	0.38	0.35
	400	0.4	0.4	0.427	0.415	0.4	0.43	0.4	0.4	0.4	0.4	0.418	0.405	0.4	0.414	0.4	0.4	0.4	0.4	0.418	0.41	0.4	0.412	0.4	0.4	0.4	0.4	0.427	0.402	0.4	0.427	0.4	0.4	0.4	0.4	0.411	0.405	0.4	0.412	0.4	0.4	0.4	0.4	0.444	0.413	0.4	0.461	0.402	0.4
	450	0.45	0.45	0.463	0.467	0.45	0.463	0.45	0.45	0.45	0.45	0.462	0.462	0.45	0.457	0.45	0.45	0.45	0.45	0.462	0.456	0.45	0.457	0.45	0.45	0.45	0.45	0.463	0.46	0.45	0.464	0.45	0.45	0.45	0.45	0.456	0.45	0.45	0.455	0.45	0.45	0.45	0.45	0.468	0.455	0.45	0.481	0.45	0.45
	500	0.5	0.5	0.5	0.5	0.5	0.5	0.5	0.5	0.5	0.5	0.5	0.5	0.5	0.5	0.5	0.5	0.5	0.5	0.5	0.5	0.5	0.5	0.5	0.5	0.5	0.5	0.5	0.5	0.5	0.5	0.5	0.5	0.5	0.5	0.5	0.5	0.5	0.5	0.5	0.5	0.5	0.5	0.5	0.5	0.5	0.5	0.5	0.5
[truncated: 17 more columns]

## Sheet: 2.4
kb	ks	CC-CC	CC-H_index	CC-K_shell	CC-EC	CC-LR	CC-R	CC-LC	CC-ECC	H_index-CC	H_index-H_index	H_index-K_shell	H_index-EC	H_index-LR	H_index-R	H_index-LC	H_index-ECC	K_shell-CC	K_shell-H_index	K_shell-K_shell	K_shell-EC	K_shell-LR	K_shell-R	K_shell-LC	K_shell-ECC	EC-CC	EC-H_index	EC-K_shell	EC-EC	EC-LR	EC-R	EC-LC	EC-ECC	LR-CC	LR-H_index	LR-K_shell	LR-EC	LR-LR	LR-R	LR-LC	LR-ECC	R-CC	R-H_index	R-K_shell	R-EC	R-LR	R-R	R-LC	R-ECC
50	50	0.163	0.206	0.2	0.139	0.281	0.119	0.189	0.066	0.168	0.199	0.193	0.125	0.265	0.107	0.186	0.068	0.183	0.192	0.202	0.128	0.273	0.114	0.195	0.077	0.158	0.187	0.2	0.133	0.257	0.107	0.176	0.073	0.143	0.174	0.171	0.133	0.225	0.118	0.152	0.073	0.462	0.463	0.462	0.467	0.49	0.128	0.459	0.089
	100	0.235	0.31	0.298	0.219	0.397	0.226	0.275	0.132	0.24	0.3	0.293	0.207	0.366	0.201	0.28	0.139	0.253	0.302	0.3	0.216	0.391	0.194	0.288	0.148	0.246	0.298	0.294	0.224	0.353	0.197	0.264	0.15	0.222	0.272	0.263	0.208	0.328	0.196	0.247	0.145	0.538	0.546	0.548	0.535	0.58	0.258	0.526	0.175
	150	0.279	0.375	0.347	0.269	0.473	0.307	0.381	0.208	0.301	0.354	0.341	0.273	0.429	0.292	0.385	0.204	0.316	0.37	0.355	0.293	0.463	0.307	0.381	0.209	0.296	0.359	0.334	0.271	0.418	0.293	0.368	0.208	0.277	0.331	0.3	0.279	0.406	0.281	0.347	0.212	0.568	0.581	0.589	0.566	0.627	0.366	0.587	0.265
	200	0.335	0.413	0.373	0.32	0.53	0.38	0.443	0.266	0.326	0.394	0.368	0.315	0.485	0.385	0.444	0.267	0.347	0.403	0.383	0.326	0.513	0.371	0.441	0.266	0.328	0.397	0.361	0.317	0.471	0.399	0.43	0.274	0.324	0.377	0.339	0.325	0.45	0.376	0.413	0.273	0.593	0.612	0.606	0.591	0.662	0.467	0.629	0.347
	250	0.372	0.442	0.414	0.355	0.56	0.452	0.497	0.324	0.372	0.44	0.417	0.369	0.502	0.441	0.493	0.332	0.381	0.442	0.427	0.367	0.548	0.455	0.49	0.334	0.371	0.43	0.419	0.365	0.486	0.453	0.483	0.325	0.37	0.422	0.424	0.366	0.474	0.43	0.467	0.327	0.613	0.638	0.64	0.617	0.676	0.529	0.647	0.419
	300	0.41	0.489	0.505	0.401	0.571	0.52	0.552	0.37	0.409	0.489	0.503	0.404	0.53	0.514	0.549	0.393	0.413	0.489	0.503	0.408	0.564	0.513	0.547	0.379	0.408	0.476	0.498	0.399	0.515	0.53	0.54	0.37	0.395	0.462	0.5	0.397	0.512	0.492	0.524	0.362	0.63	0.664	0.668	0.632	0.698	0.567	0.659	0.471
	350	0.435	0.524	0.577	0.434	0.583	0.574	0.606	0.417	0.442	0.517	0.575	0.434	0.571	0.569	0.599	0.426	0.444	0.52	0.571	0.443	0.577	0.575	0.596	0.433	0.432	0.507	0.57	0.429	0.568	0.56	0.592	0.406	0.419	0.498	0.551	0.422	0.546	0.569	0.577	0.411	0.651	0.684	0.68	0.651	0.717	0.647	0.678	0.548
	400	0.458	0.553	0.613	0.466	0.614	0.616	0.645	0.448	0.466	0.552	0.608	0.464	0.577	0.618	0.64	0.474	0.469	0.546	0.606	0.468	0.611	0.624	0.634	0.464	0.454	0.539	0.6	0.452	0.568	0.635	0.631	0.448	0.443	0.539	0.584	0.44	0.546	0.596	0.617	0.446	0.677	0.694	0.691	0.678	0.721	0.692	0.697	0.604
	450	0.487	0.577	0.648	0.486	0.634	0.681	0.685	0.491	0.486	0.58	0.645	0.493	0.577	0.679	0.68	0.494	0.494	0.569	0.641	0.496	0.625	0.674	0.676	0.504	0.47	0.57	0.638	0.469	0.568	0.66	0.672	0.48	0.469	0.565	0.627	0.465	0.546	0.655	0.658	0.475	0.689	0.709	0.701	0.684	0.731	0.745	0.71	0.637
	500	0.508	0.604	0.679	0.508	0.634	0.713	0.705	0.518	0.513	0.603	0.676	0.514	0.577	0.715	0.709	0.515	0.52	0.599	0.673	0.517	0.625	0.712	0.71	0.522	0.502	0.597	0.668	0.502	0.568	0.693	0.706	0.502	0.52	0.586	0.659	0.514	0.546	0.704	0.696	0.508	0.702	0.724	0.751	0.7	0.752	0.785	0.719	0.667
100	50	0.112	0.163	0.16	0.105	0.212	0.096	0.113	0.068	0.093	0.147	0.132	0.079	0.221	0.095	0.128	0.065	0.12	0.161	0.144	0.079	0.2	0.102	0.118	0.071	0.13	0.175	0.161	0.122	0.216	0.105	0.112	0.07	0.058	0.128	0.094	0.058	0.162	0.092	0.105	0.056	0.421	0.426	0.416	0.411	0.452	0.12	0.426	0.086
	100	0.171	0.248	0.21	0.168	0.317	0.183	0.242	0.129	0.149	0.223	0.184	0.134	0.312	0.191	0.219	0.123	0.17	0.239	0.189	0.139	0.302	0.191	0.219	0.127	0.189	0.259	0.215	0.194	0.333	0.205	0.239	0.133	0.131	0.194	0.191	0.1	0.26	0.161	0.195	0.102	0.503	0.497	0.502	0.498	0.537	0.245	0.496	0.181
	150	0.226	0.299	0.249	0.225	0.369	0.257	0.309	0.194	0.193	0.281	0.28	0.18	0.414	0.267	0.295	0.186	0.216	0.286	0.277	0.207	0.347	0.273	0.291	0.182	0.233	0.3	0.252	0.237	0.405	0.267	0.306	0.185	0.182	0.274	0.299	0.169	0.306	0.266	0.27	0.154	0.532	0.529	0.53	0.528	0.586	0.353	0.556	0.269
	200	0.263	0.346	0.35	0.273	0.398	0.357	0.377	0.25	0.234	0.343	0.367	0.231	0.441	0.336	0.355	0.227	0.26	0.345	0.37	0.254	0.384	0.346	0.354	0.229	0.279	0.346	0.35	0.281	0.452	0.348	0.368	0.244	0.237	0.339	0.387	0.252	0.374	0.326	0.333	0.219	0.548	0.566	0.568	0.545	0.613	0.49	0.587	0.349
	250	0.308	0.396	0.435	0.308	0.438	0.415	0.442	0.292	0.267	0.389	0.451	0.268	0.452	0.392	0.421	0.275	0.285	0.391	0.446	0.292	0.443	0.397	0.416	0.28	0.305	0.394	0.432	0.309	0.461	0.427	0.431	0.293	0.319	0.397	0.434	0.271	0.398	0.38	0.397	0.268	0.566	0.597	0.606	0.565	0.629	0.523	0.609	0.413
	300	0.339	0.433	0.484	0.34	0.468	0.487	0.502	0.337	0.319	0.431	0.485	0.304	0.508	0.454	0.481	0.305	0.32	0.433	0.481	0.326	0.45	0.48	0.478	0.324	0.334	0.434	0.481	0.333	0.497	0.477	0.492	0.337	0.371	0.434	0.482	0.346	0.398	0.464	0.455	0.333	0.592	0.617	0.62	0.588	0.659	0.576	0.629	0.471
	350	0.36	0.474	0.527	0.358	0.468	0.543	0.549	0.361	0.393	0.469	0.532	0.375	0.53	0.523	0.533	0.377	0.357	0.466	0.525	0.353	0.45	0.517	0.529	0.352	0.362	0.469	0.523	0.365	0.539	0.538	0.54	0.367	0.398	0.467	0.523	0.389	0.398	0.511	0.504	0.377	0.616	0.628	0.63	0.616	0.663	0.625	0.645	0.537
	400	0.43	0.505	0.563	0.419	0.468	0.577	0.593	0.408	0.452	0.495	0.565	0.448	0.53	0.575	0.58	0.428	0.45	0.498	0.561	0.424	0.45	0.585	0.576	0.414	0.422	0.501	0.56	0.409	0.543	0.586	0.584	0.406	0.402	0.49	0.567	0.444	0.412	0.564	0.558	0.43	0.638	0.647	0.642	0.635	0.674	0.677	0.667	0.583
	450	0.468	0.535	0.601	0.46	0.468	0.63	0.633	0.463	0.452	0.515	0.604	0.502	0.53	0.621	0.623	0.476	0.45	0.513	0.601	0.484	0.466	0.617	0.619	0.47	0.463	0.525	0.598	0.463	0.543	0.615	0.627	0.461	0.474	0.5	0.607	0.508	0.48	0.602	0.602	0.478	0.644	0.666	0.687	0.646	0.691	0.727	0.676	0.605
	500	0.514	0.544	0.634	0.537	0.524	0.681	0.655	0.518	0.516	0.525	0.638	0.522	0.53	0.679	0.652	0.516	0.514	0.523	0.637	0.513	0.52	0.664	0.648	0.514	0.515	0.536	0.63	0.535	0.543	0.664	0.654	0.517	0.504	0.506	0.643	0.539	0.506	0.651	0.631	0.504	0.661	0.678	0.716	0.657	0.7	0.758	0.683	0.634
150	50	0.101	0.15	0.118	0.097	0.183	0.097	0.138	0.06	0.069	0.12	0.101	0.059	0.186	0.087	0.095	0.059	0.075	0.124	0.108	0.064	0.183	0.087	0.087	0.054	0.085	0.142	0.115	0.087	0.203	0.097	0.113	0.068	0.107	0.097	0.106	0.055	0.135	0.089	0.08	0.061	0.402	0.399	0.404	0.397	0.431	0.149	0.409	0.087
	100	0.155	0.221	0.17	0.146	0.287	0.193	0.208	0.121	0.13	0.201	0.212	0.125	0.303	0.17	0.181	0.106	0.128	0.202	0.212	0.13	0.298	0.163	0.163	0.113	0.127	0.205	0.182	0.132	0.306	0.179	0.188	0.12	0.159	0.191	0.216	0.107	0.204	0.153	0.152	0.122	0.474	0.472	0.472	0.475	0.525	0.252	0.477	0.18
	150	0.191	0.273	0.279	0.187	0.317	0.263	0.284	0.177	0.205	0.277	0.307	0.201	0.337	0.235	0.254	0.169	0.192	0.27	0.31	0.202	0.323	0.241	0.238	0.172	0.182	0.272	0.28	0.175	0.373	0.257	0.267	0.166	0.244	0.254	0.284	0.159	0.262	0.24	0.219	0.188	0.502	0.507	0.499	0.5	0.567	0.341	0.527	0.267
	200	0.221	0.332	0.363	0.222	0.37	0.34	0.352	0.222	0.264	0.327	0.366	0.234	0.39	0.303	0.319	0.23	0.253	0.323	0.358	0.248	0.386	0.302	0.307	0.223	0.215	0.325	0.37	0.216	0.389	0.31	0.338	0.212	0.262	0.3	0.337	0.222	0.262	0.295	0.283	0.234	0.516	0.54	0.549	0.52	0.604	0.431	0.555	0.343
	250	0.253	0.372	0.418	0.255	0.408	0.41	0.415	0.257	0.342	0.369	0.417	0.293	0.44	0.372	0.384	0.277	0.326	0.363	0.409	0.266	0.426	0.368	0.376	0.274	0.268	0.369	0.414	0.269	0.436	0.382	0.402	0.257	0.262	0.345	0.393	0.261	0.262	0.358	0.343	0.276	0.542	0.567	0.572	0.539	0.613	0.504	0.571	0.4
	300	0.315	0.412	0.462	0.309	0.408	0.442	0.471	0.313	0.342	0.411	0.463	0.337	0.45	0.435	0.447	0.331	0.326	0.401	0.454	0.377	0.438	0.429	0.438	0.322	0.342	0.408	0.457	0.342	0.472	0.447	0.457	0.32	0.328	0.378	0.436	0.324	0.328	0.412	0.4	0.342	0.56	0.585	0.586	0.558	0.637	0.557	0.592	0.472
	350	0.39	0.446	0.502	0.405	0.408	0.512	0.52	0.372	0.358	0.434	0.504	0.448	0.45	0.492	0.501	0.382	0.372	0.423	0.496	0.401	0.438	0.495	0.497	0.39	0.39	0.441	0.497	0.381	0.474	0.489	0.508	0.374	0.378	0.393	0.484	0.402	0.38	0.463	0.464	0.382	0.589	0.596	0.593	0.591	0.649	0.615	0.609	0.525
	400	0.408	0.477	0.539	0.432	0.408	0.556	0.566	0.41	0.426	0.443	0.542	0.438	0.45	0.537	0.547	0.428	0.422	0.433	0.535	0.423	0.438	0.531	0.546	0.422	0.41	0.461	0.535	0.435	0.474	0.561	0.554	0.422	0.4	0.4	0.525	0.456	0.4	0.508	0.513	0.4	0.601	0.614	0.622	0.599	0.65	0.662	0.628	0.556
	450	0.47	0.489	0.571	0.495	0.472	0.611	0.592	0.47	0.45	0.45	0.581	0.505	0.45	0.583	0.578	0.45	0.45	0.45	0.575	0.501	0.45	0.593	0.579	0.45	0.464	0.469	0.568	0.489	0.474	0.608	0.584	0.464	0.45	0.45	0.555	0.495	0.45	0.571	0.553	0.45	0.614	0.628	0.657	0.61	0.665	0.681	0.633	0.583
	500	0.5	0.5	0.607	0.512	0.5	0.648	0.625	0.5	0.5	0.5	0.615	0.532	0.5	0.631	0.62	0.5	0.5	0.5	0.607	0.564	0.5	0.621	0.624	0.5	0.5	0.5	0.601	0.548	0.5	0.624	0.626	0.5	0.5	0.5	0.601	0.56	0.5	0.625	0.601	0.5	0.62	0.639	0.682	0.621	0.665	0.712	0.645	0.605
200	50	0.068	0.129	0.101	0.062	0.162	0.081	0.095	0.061	0.11	0.118	0.124	0.058	0.152	0.08	0.084	0.064	0.088	0.108	0.112	0.06	0.145	0.08	0.08	0.056	0.068	0.127	0.094	0.068	0.163	0.097	0.09	0.059	0.094	0.106	0.118	0.051	0.134	0.07	0.065	0.075	0.365	0.367	0.372	0.358	0.396	0.118	0.372	0.09
	100	0.107	0.198	0.198	0.105	0.231	0.168	0.178	0.105	0.175	0.191	0.23	0.108	0.214	0.155	0.162	0.132	0.168	0.193	0.221	0.129	0.21	0.154	0.157	0.125	0.113	0.188	0.196	0.109	0.234	0.158	0.174	0.11	0.143	0.18	0.179	0.112	0.197	0.145	0.126	0.124	0.417	0.432	0.426	0.422	0.492	0.269	0.446	0.176
	150	0.178	0.271	0.284	0.175	0.293	0.23	0.254	0.156	0.228	0.256	0.291	0.162	0.264	0.231	0.229	0.187	0.217	0.249	0.286	0.182	0.267	0.227	0.226	0.186	0.167	0.263	0.287	0.161	0.291	0.24	0.251	0.154	0.157	0.233	0.234	0.194	0.261	0.206	0.189	0.181	0.455	0.469	0.476	0.455	0.532	0.32	0.49	0.257
	200	0.23	0.316	0.353	0.222	0.343	0.315	0.323	0.215	0.264	0.304	0.343	0.22	0.264	0.305	0.296	0.236	0.267	0.297	0.335	0.233	0.267	0.288	0.292	0.236	0.25	0.31	0.347	0.227	0.332	0.305	0.321	0.214	0.231	0.271	0.29	0.21	0.291	0.264	0.25	0.235	0.476	0.51	0.521	0.479	0.564	0.427	0.516	0.343
	250	0.284	0.357	0.399	0.272	0.343	0.38	0.385	0.272	0.264	0.341	0.388	0.284	0.264	0.358	0.363	0.274	0.267	0.337	0.386	0.279	0.267	0.352	0.361	0.273	0.306	0.354	0.394	0.279	0.332	0.379	0.384	0.279	0.281	0.29	0.339	0.269	0.295	0.315	0.31	0.283	0.503	0.534	0.536	0.503	0.587	0.507	0.534	0.408
	300	0.343	0.398	0.442	0.359	0.343	0.452	0.442	0.327	0.324	0.362	0.433	0.324	0.326	0.408	0.422	0.336	0.323	0.357	0.429	0.326	0.323	0.419	0.421	0.331	0.332	0.391	0.437	0.331	0.332	0.432	0.439	0.322	0.3	0.3	0.389	0.334	0.3	0.379	0.368	0.3	0.528	0.547	0.546	0.528	0.599	0.55	0.557	0.454
	350	0.357	0.418	0.481	0.397	0.363	0.491	0.49	0.373	0.368	0.375	0.474	0.375	0.37	0.466	0.474	0.372	0.367	0.372	0.469	0.382	0.369	0.467	0.474	0.369	0.366	0.413	0.478	0.427	0.368	0.474	0.489	0.378	0.35	0.35	0.434	0.356	0.35	0.433	0.426	0.35	0.548	0.564	0.564	0.547	0.601	0.58	0.579	0.49
	400	0.417	0.428	0.514	0.424	0.421	0.532	0.521	0.419	0.4	0.4	0.508	0.409	0.4	0.513	0.516	0.4	0.4	0.4	0.506	0.447	0.4	0.518	0.517	0.4	0.418	0.421	0.517	0.435	0.418	0.521	0.521	0.418	0.4	0.4	0.474	0.454	0.4	0.48	0.476	0.4	0.56	0.577	0.607	0.56	0.616	0.629	0.592	0.52
	450	0.45	0.45	0.555	0.477	0.45	0.586	0.568	0.45	0.45	0.45	0.554	0.487	0.45	0.559	0.562	0.45	0.45	0.45	0.542	0.506	0.45	0.561	0.566	0.45	0.45	0.45	0.553	0.477	0.45	0.575	0.569	0.45	0.45	0.45	0.526	0.458	0.45	0.538	0.528	0.45	0.568	0.59	0.63	0.566	0.618	0.64	0.597	0.55
	500	0.5	0.5	0.594	0.516	0.5	0.615	0.588	0.5	0.5	0.5	0.592	0.525	0.5	0.611	0.584	0.5	0.5	0.5	0.582	0.546	0.5	0.599	0.584	0.5	0.5	0.5	0.59	0.538	0.5	0.626	0.592	0.5	0.5	0.5	0.568	0.516	0.5	0.57	0.562	0.5	0.579	0.606	0.657	0.579	0.618	0.673	0.61	0.576
250	50	0.08	0.112	0.102	0.067	0.175	0.089	0.083	0.059	0.084	0.106	0.133	0.052	0.154	0.077	0.072	0.075	0.111	0.109	0.124	0.063	0.12	0.075	0.074	0.064	0.078	0.11	0.095	0.06	0.175	0.076	0.084	0.064	0.067	0.09	0.09	0.055	0.067	0.065	0.058	0.064	0.347	0.344	0.348	0.345	0.37	0.152	0.352	0.093
	100	0.126	0.188	0.208	0.124	0.265	0.172	0.167	0.102	0.178	0.178	0.207	0.116	0.227	0.145	0.145	0.133	0.147	0.182	0.223	0.112	0.217	0.161	0.15	0.131	0.121	0.187	0.199	0.114	0.269	0.171	0.168	0.11	0.123	0.154	0.148	0.115	0.123	0.12	0.119	0.137	0.389	0.4	0.4	0.394	0.448	0.254	0.423	0.171
	150	0.188	0.25	0.286	0.174	0.294	0.235	0.243	0.166	0.193	0.235	0.259	0.161	0.287	0.221	0.211	0.181	0.229	0.242	0.268	0.169	0.229	0.219	0.218	0.182	0.187	0.247	0.288	0.167	0.287	0.228	0.246	0.164	0.185	0.197	0.207	0.184	0.185	0.175	0.178	0.189	0.426	0.446	0.453	0.425	0.491	0.355	0.462	0.265
	200	0.249	0.294	0.326	0.236	0.36	0.305	0.311	0.229	0.207	0.281	0.315	0.216	0.317	0.269	0.275	0.235	0.229	0.285	0.324	0.214	0.229	0.291	0.288	0.224	0.25	0.294	0.329	0.21	0.361	0.303	0.313	0.226	0.215	0.215	0.256	0.237	0.215	0.243	0.237	0.215	0.447	0.478	0.484	0.445	0.509	0.416	0.484	0.34
	250	0.276	0.338	0.374	0.313	0.38	0.357	0.371	0.271	0.273	0.303	0.358	0.273	0.319	0.336	0.337	0.285	0.265	0.313	0.365	0.276	0.267	0.334	0.348	0.281	0.283	0.339	0.376	0.271	0.383	0.362	0.372	0.274	0.25	0.25	0.308	0.255	0.25	0.301	0.291	0.25	0.471	0.494	0.502	0.468	0.52	0.48	0.5	0.39
	300	0.32	0.363	0.418	0.35	0.38	0.422	0.426	0.33	0.315	0.318	0.404	0.331	0.319	0.398	0.4	0.315	0.319	0.326	0.412	0.313	0.319	0.392	0.406	0.319	0.315	0.367	0.418	0.318	0.383	0.427	0.426	0.331	0.3	0.3	0.361	0.306	0.3	0.346	0.348	0.3	0.496	0.512	0.51	0.494	0.531	0.502	0.52	0.429
	350	0.37	0.374	0.454	0.41	0.38	0.471	0.459	0.37	0.35	0.35	0.446	0.359	0.35	0.434	0.451	0.35	0.35	0.35	0.452	0.374	0.35	0.436	0.453	0.35	0.369	0.377	0.457	0.395	0.383	0.474	0.459	0.371	0.35	0.35	0.405	0.356	0.35	0.409	0.403	0.35	0.508	0.527	0.551	0.507	0.551	0.577	0.541	0.466
	400	0.4	0.4	0.497	0.435	0.4	0.507	0.508	0.4	0.4	0.4	0.485	0.425	0.4	0.485	0.502	0.4	0.4	0.4	0.485	0.419	0.4	0.499	0.503	0.4	0.4	0.4	0.499	0.444	0.4	0.511	0.509	0.4	0.4	0.4	0.456	0.433	0.4	0.456	0.456	0.4	0.516	0.543	0.577	0.516	0.551	0.582	0.548	0.498
	450	0.45	0.45	0.535	0.516	0.45	0.556	0.538	0.45	0.45	0.45	0.528	0.464	0.45	0.533	0.53	0.45	0.45	0.45	0.53	0.47	0.45	0.534	0.531	0.45	0.45	0.45	0.537	0.473	0.45	0.563	0.538	0.45	0.45	0.45	0.501	0.456	0.45	0.523	0.493	0.45	0.527	0.556	0.604	0.526	0.551	0.638	0.561	0.524
	500	0.5	0.5	0.571	0.554	0.5	0.588	0.55	0.5	0.5	0.5	0.564	0.505	0.5	0.583	0.547	0.5	0.5	0.5	0.567	0.54	0.5	0.58	0.546	0.5	0.5	0.5	0.573	0.522	0.5	0.591	0.55	0.5	0.5	0.5	0.544	0.517	0.5	0.548	0.527	0.5	0.54	0.567	0.631	0.54	0.551	0.666	0.574	0.542
300	50	0.074	0.104	0.103	0.057	0.169	0.081	0.086	0.058	0.094	0.092	0.13	0.073	0.121	0.072	0.07	0.076	0.093	0.095	0.126	0.066	0.126	0.065	0.07	0.072	0.075	0.107	0.105	0.053	0.135	0.087	0.095	0.059	0.066	0.086	0.078	0.075	0.066	0.06	0.058	0.074	0.279	0.292	0.28	0.276	0.322	0.159	0.297	0.088
	100	0.126	0.183	0.207	0.134	0.243	0.157	0.167	0.115	0.136	0.163	0.18	0.146	0.136	0.138	0.13	0.126	0.126	0.16	0.177	0.141	0.2	0.135	0.13	0.122	0.121	0.185	0.203	0.116	0.204	0.168	0.177	0.115	0.124	0.128	0.133	0.106	0.124	0.125	0.114	0.124	0.325	0.342	0.343	0.321	0.386	0.265	0.369	0.16
	150	0.174	0.234	0.271	0.191	0.292	0.217	0.24	0.173	0.164	0.21	0.239	0.169	0.166	0.195	0.194	0.18	0.166	0.215	0.235	0.168	0.244	0.201	0.192	0.186	0.182	0.238	0.271	0.178	0.26	0.238	0.25	0.172	0.15	0.15	0.189	0.168	0.15	0.179	0.167	0.15	0.363	0.39	0.394	0.357	0.414	0.303	0.402	0.23
	200	0.248	0.28	0.321	0.226	0.33	0.289	0.301	0.226	0.226	0.239	0.281	0.221	0.228	0.261	0.257	0.228	0.228	0.24	0.284	0.211	0.25	0.262	0.255	0.23	0.26	0.279	0.319	0.234	0.26	0.295	0.311	0.229	0.2	0.2	0.241	0.247	0.2	0.231	0.221	0.2	0.392	0.414	0.413	0.383	0.446	0.346	0.424	0.313
	250	0.252	0.314	0.362	0.276	0.334	0.355	0.358	0.276	0.256	0.258	0.331	0.276	0.256	0.324	0.316	0.256	0.25	0.25	0.333	0.251	0.25	0.317	0.318	0.25	0.26	0.318	0.36	0.266	0.26	0.35	0.366	0.266	0.25	0.25	0.292	0.264	0.25	0.282	0.276	0.25	0.41	0.433	0.433	0.408	0.461	0.438	0.453	0.362
	300	0.322	0.329	0.402	0.339	0.334	0.414	0.394	0.322	0.3	0.3	0.378	0.311	0.3	0.375	0.369	0.3	0.3	0.3	0.378	0.326	0.3	0.368	0.372	0.3	0.322	0.336	0.405	0.325	0.322	0.392	0.4	0.324	0.3	0.3	0.345	0.311	0.3	0.343	0.332	0.3	0.425	0.457	0.492	0.423	0.49	0.478	0.483	0.404
	350	0.35	0.35	0.443	0.367	0.35	0.449	0.444	0.35	0.35	0.35	0.414	0.366	0.35	0.412	0.428	0.35	0.35	0.35	0.416	0.387	0.35	0.418	0.432	0.35	0.35	0.35	0.445	0.373	0.35	0.455	0.45	0.35	0.35	0.35	0.385	0.358	0.35	0.393	0.385	0.35	0.436	0.477	0.523	0.438	0.49	0.537	0.495	0.435
	400	0.4	0.4	0.479	0.424	0.4	0.499	0.481	0.4	0.4	0.4	0.46	0.464	0.4	0.475	0.467	0.4	0.4	0.4	0.47	0.447	0.4	0.472	0.473	0.4	0.4	0.4	0.48	0.433	0.4	0.505	0.487	0.4	0.4	0.4	0.434	0.427	0.4	0.433	0.428	0.4	0.455	0.49	0.551	0.454	0.49	0.572	0.507	0.459
	450	0.45	0.45	0.524	0.501	0.45	0.543	0.5	0.45	0.45	0.45	0.504	0.489	0.45	0.515	0.495	0.45	0.45	0.45	0.509	0.455	0.45	0.511	0.496	0.45	0.45	0.45	0.525	0.473	0.45	0.534	0.5	0.45	0.45	0.45	0.478	0.496	0.45	0.482	0.473	0.45	0.469	0.505	0.58	0.468	0.49	0.59	0.525	0.471
	500	0.5	0.5	0.556	0.527	0.5	0.58	0.509	0.5	0.5	0.5	0.546	0.519	0.5	0.559	0.509	0.5	0.5	0.5	0.552	0.537	0.5	0.55	0.509	0.5	0.5	0.5	0.557	0.554	0.5	0.567	0.509	0.5	0.5	0.5	0.526	0.525	0.5	0.528	0.509	0.5	0.506	0.51	0.604	0.5	0.508	0.613	0.547	0.508
350	50	0.066	0.097	0.104	0.063	0.107	0.091	0.091	0.057	0.097	0.092	0.111	0.082	0.121	0.07	0.062	0.075	0.067	0.088	0.091	0.065	0.107	0.057	0.059	0.064	0.067	0.098	0.107	0.06	0.111	0.079	0.09	0.056	0.07	0.08	0.068	0.06	0.086	0.06	0.053	0.074	0.248	0.255	0.238	0.248	0.298	0.114	0.26	0.086
	100	0.119	0.171	0.203	0.116	0.196	0.16	0.169	0.113	0.103	0.154	0.165	0.138	0.187	0.132	0.127	0.129	0.119	0.14	0.148	0.111	0.155	0.133	0.119	0.125	0.123	0.168	0.205	0.126	0.198	0.159	0.168	0.112	0.114	0.114	0.125	0.102	0.116	0.117	0.106	0.114	0.295	0.313	0.312	0.298	0.367	0.213	0.337	0.157
	150	0.214	0.219	0.254	0.195	0.214	0.224	0.231	0.176	0.175	0.186	0.219	0.167	0.205	0.19	0.188	0.181	0.163	0.162	0.201	0.202	0.167	0.189	0.178	0.163	0.211	0.219	0.252	0.162	0.211	0.22	0.231	0.176	0.15	0.15	0.176	0.155	0.15	0.172	0.161	0.15	0.322	0.351	0.348	0.319	0.395	0.307	0.363	0.231
	200	0.214	0.267	0.306	0.262	0.214	0.277	0.292	0.22	0.205	0.205	0.266	0.26	0.205	0.258	0.247	0.205	0.2	0.2	0.252	0.226	0.2	0.242	0.238	0.2	0.211	0.262	0.302	0.226	0.211	0.28	0.29	0.219	0.2	0.2	0.23	0.209	0.2	0.224	0.219	0.2	0.357	0.38	0.367	0.35	0.436	0.354	0.391	0.297
	250	0.266	0.289	0.346	0.284	0.268	0.326	0.331	0.278	0.25	0.25	0.314	0.288	0.25	0.314	0.307	0.25	0.25	0.25	0.3	0.281	0.25	0.295	0.294	0.25	0.269	0.286	0.344	0.312	0.271	0.35	0.33	0.273	0.25	0.25	0.281	0.265	0.25	0.286	0.274	0.25	0.374	0.393	0.43	0.372	0.44	0.429	0.423	0.347
	300	0.3	0.3	0.384	0.329	0.3	0.387	0.386	0.3	0.3	0.3	0.353	0.327	0.3	0.36	0.361	0.3	0.3	0.3	0.343	0.337	0.3	0.345	0.354	0.3	0.3	0.3	0.382	0.347	0.3	0.376	0.386	0.3	0.3	0.3	0.332	0.303	0.3	0.332	0.327	0.3	0.387	0.421	0.463	0.388	0.462	0.476	0.449	0.385
	350	0.35	0.35	0.422	0.405	0.35	0.435	0.427	0.35	0.35	0.35	0.405	0.375	0.35	0.407	0.413	0.35	0.35	0.35	0.392	0.376	0.35	0.388	0.405	0.35	0.35	0.35	0.421	0.363	0.35	0.43	0.427	0.35	0.35	0.35	0.382	0.365	0.35	0.375	0.374	0.35	0.406	0.437	0.492	0.404	0.462	0.495	0.459	0.407
	400	0.4	0.4	0.471	0.427	0.4	0.479	0.45	0.4	0.4	0.4	0.451	0.428	0.4	0.45	0.444	0.4	0.4	0.4	0.436	0.448	0.4	0.445	0.441	0.4	0.4	0.4	0.466	0.42	0.4	0.48	0.45	0.4	0.4	0.4	0.426	0.407	0.4	0.43	0.422	0.4	0.42	0.457	0.525	0.419	0.462	0.551	0.475	0.42
	450	0.45	0.45	0.507	0.504	0.45	0.52	0.459	0.45	0.45	0.45	0.493	0.478	0.45	0.49	0.459	0.45	0.45	0.45	0.484	0.497	0.45	0.478	0.459	0.45	0.45	0.45	0.503	0.468	0.45	0.522	0.459	0.45	0.45	0.45	0.475	0.475	0.45	0.472	0.459	0.45	0.458	0.462	0.552	0.452	0.462	0.57	0.5	0.458
	500	0.5	0.5	0.545	0.548	0.5	0.555	0.5	0.5	0.5	0.5	0.531	0.536	0.5	0.538	0.5	0.5	0.5	0.5	0.527	0.541	0.5	0.534	0.5	0.5	0.5	0.5	0.542	0.516	0.5	0.557	0.5	0.5	0.5	0.5	0.519	0.521	0.5	0.524	0.5	0.5	0.5	0.5	0.577	0.512	0.5	0.603	0.522	0.5
400	50	0.068	0.102	0.12	0.068	0.148	0.075	0.084	0.062	0.051	0.081	0.083	0.055	0.051	0.067	0.058	0.067	0.052	0.085	0.082	0.061	0.1	0.058	0.059	0.068	0.075	0.105	0.116	0.064	0.149	0.08	0.09	0.057	0.05	0.05	0.053	0.05	0.05	0.05	0.05	0.05	0.217	0.218	0.21	0.212	0.265	0.1	0.241	0.081
	100	0.162	0.162	0.187	0.126	0.202	0.144	0.15	0.124	0.129	0.138	0.141	0.132	0.129	0.126	0.12	0.135	0.122	0.128	0.139	0.104	0.136	0.128	0.117	0.124	0.163	0.163	0.186	0.12	0.203	0.148	0.156	0.121	0.1	0.1	0.108	0.1	0.1	0.108	0.103	0.1	0.264	0.286	0.281	0.26	0.341	0.209	0.298	0.154
	150	0.162	0.214	0.24	0.174	0.242	0.2	0.213	0.176	0.159	0.161	0.19	0.151	0.159	0.189	0.179	0.159	0.15	0.15	0.187	0.154	0.15	0.185	0.176	0.15	0.169	0.217	0.24	0.175	0.247	0.209	0.219	0.169	0.15	0.15	0.159	0.15	0.15	0.158	0.155	0.15	0.287	0.322	0.308	0.286	0.377	0.291	0.332	0.231
	200	0.216	0.235	0.285	0.231	0.242	0.267	0.262	0.226	0.2	0.2	0.241	0.219	0.2	0.239	0.237	0.2	0.2	0.2	0.239	0.211	0.2	0.239	0.232	0.2	0.213	0.239	0.285	0.215	0.251	0.274	0.267	0.223	0.2	0.2	0.212	0.2	0.2	0.211	0.207	0.2	0.316	0.345	0.36	0.309	0.39	0.36	0.358	0.29
	250	0.25	0.25	0.328	0.288	0.25	0.314	0.319	0.25	0.25	0.25	0.29	0.274	0.25	0.288	0.293	0.25	0.25	0.25	0.287	0.26	0.25	0.279	0.291	0.25	0.251	0.251	0.328	0.261	0.251	0.322	0.324	0.251	0.25	0.25	0.262	0.25	0.25	0.263	0.257	0.25	0.337	0.373	0.406	0.339	0.42	0.403	0.398	0.327
	300	0.3	0.3	0.371	0.337	0.3	0.374	0.363	0.3	0.3	0.3	0.348	0.303	0.3	0.342	0.348	0.3	0.3	0.3	0.341	0.314	0.3	0.339	0.348	0.3	0.3	0.3	0.371	0.34	0.3	0.363	0.366	0.3	0.3	0.3	0.312	0.3	0.3	0.31	0.309	0.3	0.357	0.393	0.437	0.356	0.422	0.429	0.411	0.355
	350	0.35	0.35	0.414	0.395	0.35	0.417	0.399	0.35	0.35	0.35	0.397	0.386	0.35	0.4	0.39	0.35	0.35	0.35	0.385	0.354	0.35	0.381	0.387	0.35	0.35	0.35	0.411	0.375	0.35	0.428	0.4	0.35	0.35	0.35	0.36	0.35	0.35	0.362	0.356	0.35	0.374	0.416	0.468	0.374	0.422	0.49	0.425	0.373
	400	0.4	0.4	0.452	0.42	0.4	0.453	0.409	0.4	0.4	0.4	0.441	0.433	0.4	0.434	0.409	0.4	0.4	0.4	0.433	0.412	0.4	0.431	0.409	0.4	0.4	0.4	0.452	0.427	0.4	0.473	0.409	0.4	0.4	0.4	0.407	0.4	0.4	0.41	0.404	0.4	0.406	0.42	0.499	0.408	0.422	0.521	0.452	0.41
	450	0.45	0.45	0.489	0.475	0.45	0.502	0.45	0.45	0.45	0.45	0.478	0.471	0.45	0.476	0.45	0.45	0.45	0.45	0.476	0.466	0.45	0.483	0.45	0.45	0.45	0.45	0.486	0.471	0.45	0.498	0.45	0.45	0.45	0.45	0.457	0.45	0.45	0.459	0.45	0.45	0.45	0.45	0.531	0.454	0.45	0.532	0.471	0.45
	500	0.5	0.5	0.527	0.518	0.5	0.535	0.5	0.5	0.5	0.5	0.526	0.535	0.5	0.525	0.5	0.5	0.5	0.5	0.523	0.511	0.5	0.515	0.5	0.5	0.5	0.5	0.525	0.532	0.5	0.54	0.5	0.5	0.5	0.5	0.506	0.5	0.5	0.509	0.5	0.5	0.5	0.5	0.552	0.505	0.5	0.568	0.5	0.5
450	50	0.086	0.096	0.121	0.056	0.121	0.077	0.078	0.07	0.057	0.08	0.077	0.066	0.057	0.058	0.054	0.067	0.059	0.079	0.074	0.064	0.059	0.058	0.054	0.065	0.085	0.095	0.12	0.055	0.115	0.074	0.079	0.072	0.05	0.05	0.05	0.05	0.05	0.052	0.05	0.05	0.203	0.206	0.201	0.196	0.251	0.098	0.22	0.081
	100	0.122	0.16	0.169	0.107	0.194	0.135	0.147	0.12	0.115	0.116	0.136	0.109	0.115	0.116	0.113	0.115	0.105	0.107	0.132	0.109	0.105	0.12	0.111	0.105	0.13	0.16	0.173	0.106	0.13	0.129	0.147	0.121	0.1	0.1	0.105	0.1	0.1	0.101	0.1	0.1	0.245	0.26	0.254	0.244	0.306	0.2	0.27	0.155
	150	0.168	0.192	0.223	0.156	0.204	0.196	0.198	0.178	0.15	0.15	0.184	0.172	0.15	0.179	0.169	0.15	0.15	0.15	0.181	0.173	0.15	0.173	0.167	0.15	0.162	0.192	0.228	0.157	0.162	0.204	0.197	0.176	0.15	0.15	0.154	0.15	0.15	0.153	0.15	0.15	0.266	0.295	0.284	0.263	0.341	0.28	0.3	0.227
	200	0.204	0.204	0.27	0.225	0.204	0.261	0.258	0.204	0.2	0.2	0.235	0.219	0.2	0.229	0.229	0.2	0.2	0.2	0.231	0.207	0.2	0.227	0.226	0.2	0.204	0.204	0.273	0.253	0.204	0.26	0.257	0.204	0.2	0.2	0.205	0.2	0.2	0.205	0.2	0.2	0.295	0.321	0.35	0.294	0.357	0.33	0.333	0.272
	250	0.25	0.25	0.318	0.258	0.25	0.313	0.302	0.25	0.25	0.25	0.283	0.28	0.25	0.282	0.288	0.25	0.25	0.25	0.28	0.281	0.25	0.274	0.284	0.25	0.25	0.25	0.317	0.263	0.25	0.303	0.301	0.25	0.25	0.25	0.254	0.25	0.25	0.256	0.251	0.25	0.31	0.346	0.382	0.31	0.383	0.398	0.361	0.307
	300	0.3	0.3	0.361	0.315	0.3	0.349	0.346	0.3	0.3	0.3	0.333	0.314	0.3	0.333	0.334	0.3	0.3	0.3	0.329	0.326	0.3	0.322	0.332	0.3	0.3	0.3	0.359	0.309	0.3	0.36	0.347	0.3	0.3	0.3	0.305	0.3	0.3	0.302	0.302	0.3	0.329	0.37	0.412	0.33	0.383	0.435	0.375	0.328
	350	0.35	0.35	0.402	0.365	0.35	0.403	0.359	0.35	0.35	0.35	0.381	0.367	0.35	0.374	0.359	0.35	0.35	0.35	0.377	0.376	0.35	0.37	0.359	0.35	0.35	0.35	0.401	0.373	0.35	0.398	0.359	0.35	0.35	0.35	0.355	0.35	0.35	0.355	0.351	0.35	0.353	0.381	0.444	0.357	0.383	0.454	0.4	0.357
	400	0.4	0.4	0.437	0.41	0.4	0.449	0.4	0.4	0.4	0.4	0.424	0.418	0.4	0.422	0.4	0.4	0.4	0.4	0.422	0.404	0.4	0.418	0.4	0.4	0.4	0.4	0.436	0.406	0.4	0.442	0.4	0.4	0.4	0.4	0.405	0.4	0.4	0.403	0.4	0.4	0.4	0.4	0.48	0.415	0.4	0.486	0.424	0.4
	450	0.45	0.45	0.475	0.455	0.45	0.487	0.45	0.45	0.45	0.45	0.472	0.455	0.45	0.466	0.45	0.45	0.45	0.45	0.47	0.47	0.45	0.462	0.45	0.45	0.45	0.45	0.475	0.473	0.45	0.485	0.45	0.45	0.45	0.45	0.454	0.45	0.45	0.452	0.45	0.45	0.45	0.45	0.505	0.467	0.45	0.509	0.45	0.45
	500	0.5	0.5	0.516	0.502	0.5	0.515	0.5	0.5	0.5	0.5	0.511	0.513	0.5	0.513	0.5	0.5	0.5	0.5	0.509	0.516	0.5	0.506	0.5	0.5	0.5	0.5	0.515	0.506	0.5	0.519	0.5	0.5	0.5	0.5	0.503	0.5	0.5	0.501	0.5	0.5	0.5	0.5	0.526	0.505	0.5	0.531	0.5	0.5
500	50	0.079	0.086	0.096	0.083	0.079	0.071	0.069	0.066	0.062	0.072	0.068	0.058	0.08	0.058	0.054	0.068	0.059	0.075	0.074	0.059	0.085	0.055	0.055	0.065	0.083	0.086	0.098	0.068	0.111	0.059	0.069	0.069	0.05	0.05	0.05	0.05	0.05	0.053	0.05	0.05	0.17	0.181	0.178	0.169	0.209	0.122	0.19	0.076
	100	0.115	0.135	0.151	0.109	0.115	0.136	0.125	0.127	0.1	0.1	0.127	0.119	0.1	0.122	0.113	0.1	0.1	0.1	0.132	0.117	0.1	0.113	0.113	0.1	0.113	0.135	0.15	0.128	0.153	0.13	0.125	0.129	0.1	0.1	0.105	0.1	0.1	0.104	0.1	0.1	0.205	0.228	0.219	0.207	0.258	0.202	0.237	0.157
	150	0.155	0.155	0.205	0.183	0.155	0.185	0.194	0.155	0.15	0.15	0.179	0.154	0.15	0.172	0.17	0.15	0.15	0.15	0.181	0.153	0.15	0.176	0.17	0.15	0.155	0.155	0.205	0.188	0.155	0.179	0.194	0.155	0.15	0.15	0.154	0.15	0.15	0.153	0.15	0.15	0.231	0.261	0.278	0.231	0.282	0.259	0.267	0.218
	200	0.2	0.2	0.247	0.215	0.2	0.243	0.244	0.2	0.2	0.2	0.227	0.211	0.2	0.225	0.226	0.2	0.2	0.2	0.229	0.201	0.2	0.223	0.229	0.2	0.2	0.2	0.249	0.207	0.2	0.241	0.244	0.2	0.2	0.2	0.203	0.2	0.2	0.204	0.201	0.2	0.26	0.29	0.32	0.261	0.298	0.327	0.298	0.255
	250	0.25	0.25	0.292	0.28	0.25	0.291	0.291	0.25	0.25	0.25	0.273	0.267	0.25	0.28	0.276	0.25	0.25	0.25	0.277	0.263	0.25	0.275	0.279	0.25	0.25	0.25	0.294	0.274	0.25	0.291	0.292	0.25	0.25	0.25	0.253	0.25	0.25	0.253	0.252	0.25	0.283	0.316	0.353	0.282	0.298	0.366	0.323	0.277
	300	0.3	0.3	0.339	0.351	0.3	0.344	0.309	0.3	0.3	0.3	0.323	0.331	0.3	0.322	0.309	0.3	0.3	0.3	0.326	0.319	0.3	0.321	0.309	0.3	0.3	0.3	0.338	0.329	0.3	0.335	0.309	0.3	0.3	0.3	0.304	0.3	0.3	0.303	0.3	0.3	0.302	0.327	0.386	0.312	0.304	0.392	0.348	0.306
	350	0.35	0.35	0.377	0.379	0.35	0.382	0.35	0.35	0.35	0.35	0.372	0.351	0.35	0.368	0.35	0.35	0.35	0.35	0.372	0.381	0.35	0.368	0.35	0.35	0.35	0.35	0.375	0.39	0.35	0.38	0.35	0.35	0.35	0.35	0.354	0.35	0.35	0.354	0.35	0.35	0.35	0.35	0.42	0.368	0.35	0.429	0.374	0.35
	400	0.4	0.4	0.42	0.441	0.4	0.433	0.4	0.4	0.4	0.4	0.418	0.405	0.4	0.416	0.4	0.4	0.4	0.4	0.417	0.414	0.4	0.418	0.4	0.4	0.4	0.4	0.419	0.42	0.4	0.427	0.4	0.4	0.4	0.4	0.403	0.4	0.4	0.403	0.4	0.4	0.4	0.4	0.449	0.411	0.4	0.458	0.406	0.4
	450	0.45	0.45	0.463	0.462	0.45	0.462	0.45	0.45	0.45	0.45	0.46	0.459	0.45	0.46	0.45	0.45	0.45	0.45	0.458	0.456	0.45	0.459	0.45	0.45	0.45	0.45	0.463	0.469	0.45	0.469	0.45	0.45	0.45	0.45	0.452	0.45	0.45	0.45	0.45	0.45	0.45	0.45	0.473	0.461	0.45	0.483	0.45	0.45
	500	0.5	0.5	0.5	0.5	0.5	0.5	0.5	0.5	0.5	0.5	0.5	0.5	0.5	0.5	0.5	0.5	0.5	0.5	0.5	0.5	0.5	0.5	0.5	0.5	0.5	0.5	0.5	0.5	0.5	0.5	0.5	0.5	0.5	0.5	0.5	0.5	0.5	0.5	0.5	0.5	0.5	0.5	0.5	0.5	0.5	0.5	0.5	0.5
[truncated: 17 more columns]

## Sheet: 2.5
kb	ks	CC-CC	CC-H_index	CC-K_shell	CC-EC	CC-LR	CC-R	CC-LC	CC-ECC	H_index-CC	H_index-H_index	H_index-K_shell	H_index-EC	H_index-LR	H_index-R	H_index-LC	H_index-ECC	K_shell-CC	K_shell-H_index	K_shell-K_shell	K_shell-EC	K_shell-LR	K_shell-R	K_shell-LC	K_shell-ECC	EC-CC	EC-H_index	EC-K_shell	EC-EC	EC-LR	EC-R	EC-LC	EC-ECC	LR-CC	LR-H_index	LR-K_shell	LR-EC	LR-LR	LR-R	LR-LC	LR-ECC	R-CC	R-H_index	R-K_shell	R-EC	R-LR	R-R	R-LC	R-ECC
50	50	0.198	0.229	0.205	0.151	0.299	0.121	0.149	0.07	0.13	0.19	0.213	0.092	0.26	0.123	0.174	0.071	0.16	0.215	0.199	0.135	0.28	0.109	0.196	0.08	0.207	0.231	0.217	0.177	0.295	0.106	0.156	0.076	0.116	0.173	0.178	0.111	0.215	0.103	0.158	0.066	0.38	0.382	0.384	0.373	0.428	0.165	0.374	0.085
	100	0.256	0.318	0.321	0.236	0.403	0.233	0.294	0.141	0.229	0.298	0.306	0.167	0.364	0.211	0.271	0.136	0.219	0.324	0.321	0.207	0.396	0.221	0.285	0.142	0.269	0.32	0.329	0.245	0.386	0.218	0.295	0.15	0.198	0.284	0.27	0.205	0.321	0.214	0.248	0.14	0.432	0.472	0.47	0.435	0.537	0.249	0.431	0.186
	150	0.303	0.399	0.389	0.302	0.472	0.332	0.406	0.214	0.282	0.366	0.364	0.233	0.43	0.318	0.376	0.195	0.291	0.391	0.385	0.258	0.468	0.306	0.389	0.22	0.315	0.404	0.395	0.303	0.441	0.326	0.406	0.213	0.272	0.343	0.306	0.254	0.4	0.297	0.337	0.197	0.492	0.523	0.522	0.494	0.585	0.337	0.496	0.264
	200	0.362	0.444	0.432	0.361	0.509	0.391	0.469	0.275	0.331	0.426	0.397	0.307	0.485	0.399	0.451	0.261	0.364	0.437	0.415	0.326	0.515	0.419	0.456	0.276	0.359	0.445	0.427	0.357	0.509	0.401	0.467	0.276	0.315	0.395	0.362	0.304	0.442	0.383	0.415	0.262	0.532	0.568	0.564	0.536	0.623	0.464	0.54	0.339
	250	0.407	0.491	0.461	0.408	0.586	0.489	0.526	0.331	0.374	0.47	0.427	0.358	0.507	0.472	0.517	0.319	0.401	0.476	0.435	0.396	0.577	0.484	0.519	0.336	0.413	0.488	0.455	0.411	0.526	0.483	0.526	0.348	0.358	0.438	0.438	0.348	0.483	0.461	0.486	0.303	0.577	0.606	0.606	0.573	0.653	0.536	0.577	0.423
	300	0.459	0.523	0.512	0.449	0.611	0.554	0.562	0.398	0.421	0.5	0.5	0.402	0.544	0.523	0.559	0.374	0.434	0.502	0.501	0.441	0.604	0.512	0.56	0.391	0.445	0.518	0.506	0.44	0.551	0.545	0.562	0.401	0.385	0.49	0.511	0.38	0.526	0.514	0.531	0.36	0.609	0.627	0.63	0.604	0.674	0.564	0.607	0.498
	350	0.484	0.559	0.576	0.478	0.624	0.599	0.6	0.453	0.456	0.545	0.567	0.443	0.58	0.6	0.6	0.427	0.464	0.547	0.566	0.47	0.614	0.59	0.598	0.429	0.472	0.554	0.571	0.474	0.59	0.61	0.601	0.448	0.417	0.53	0.587	0.412	0.587	0.58	0.578	0.402	0.626	0.646	0.645	0.622	0.707	0.659	0.629	0.55
	400	0.507	0.591	0.636	0.507	0.627	0.635	0.627	0.494	0.489	0.581	0.626	0.474	0.613	0.636	0.629	0.483	0.489	0.582	0.627	0.498	0.616	0.647	0.627	0.48	0.502	0.587	0.633	0.496	0.626	0.641	0.63	0.496	0.442	0.566	0.622	0.44	0.587	0.631	0.611	0.442	0.642	0.668	0.656	0.639	0.716	0.689	0.645	0.593
	450	0.528	0.617	0.671	0.529	0.679	0.694	0.659	0.536	0.51	0.608	0.662	0.502	0.613	0.676	0.658	0.515	0.524	0.606	0.663	0.525	0.674	0.695	0.657	0.515	0.522	0.615	0.67	0.524	0.626	0.687	0.665	0.529	0.467	0.599	0.662	0.462	0.587	0.675	0.64	0.474	0.654	0.679	0.675	0.657	0.725	0.696	0.654	0.63
	500	0.548	0.65	0.709	0.551	0.695	0.726	0.684	0.567	0.541	0.642	0.696	0.539	0.613	0.715	0.683	0.551	0.549	0.641	0.697	0.546	0.682	0.739	0.684	0.554	0.536	0.65	0.708	0.54	0.626	0.732	0.684	0.553	0.506	0.629	0.69	0.513	0.587	0.712	0.674	0.504	0.666	0.701	0.727	0.668	0.726	0.791	0.674	0.659
100	50	0.176	0.207	0.201	0.14	0.266	0.107	0.159	0.072	0.066	0.166	0.095	0.06	0.199	0.1	0.122	0.057	0.081	0.167	0.111	0.066	0.205	0.098	0.134	0.062	0.163	0.198	0.196	0.133	0.26	0.105	0.151	0.07	0.08	0.127	0.106	0.063	0.185	0.084	0.114	0.058	0.357	0.363	0.37	0.352	0.409	0.131	0.353	0.085
	100	0.228	0.298	0.298	0.212	0.369	0.226	0.293	0.143	0.125	0.245	0.204	0.109	0.297	0.207	0.212	0.11	0.126	0.25	0.21	0.122	0.312	0.189	0.225	0.113	0.223	0.294	0.287	0.207	0.368	0.194	0.285	0.14	0.144	0.206	0.203	0.125	0.305	0.175	0.194	0.111	0.403	0.45	0.449	0.409	0.49	0.322	0.401	0.184
	150	0.286	0.357	0.338	0.273	0.414	0.278	0.368	0.213	0.174	0.305	0.299	0.155	0.339	0.269	0.296	0.157	0.174	0.302	0.298	0.175	0.345	0.273	0.298	0.167	0.279	0.35	0.332	0.266	0.413	0.302	0.363	0.211	0.215	0.277	0.3	0.18	0.405	0.248	0.269	0.177	0.462	0.502	0.496	0.466	0.55	0.347	0.466	0.255
	200	0.331	0.405	0.368	0.325	0.508	0.385	0.438	0.276	0.231	0.371	0.383	0.231	0.393	0.354	0.38	0.211	0.204	0.365	0.384	0.206	0.385	0.359	0.386	0.209	0.329	0.403	0.365	0.324	0.51	0.39	0.434	0.273	0.265	0.343	0.386	0.264	0.427	0.349	0.343	0.239	0.498	0.538	0.539	0.504	0.58	0.436	0.504	0.337
	250	0.362	0.433	0.433	0.375	0.533	0.46	0.479	0.327	0.278	0.421	0.463	0.297	0.441	0.405	0.44	0.261	0.292	0.422	0.458	0.278	0.438	0.429	0.447	0.258	0.361	0.43	0.433	0.36	0.529	0.434	0.479	0.329	0.303	0.411	0.446	0.314	0.465	0.405	0.408	0.285	0.552	0.57	0.568	0.546	0.601	0.536	0.545	0.406
	300	0.4	0.481	0.505	0.397	0.543	0.491	0.525	0.374	0.331	0.471	0.518	0.358	0.497	0.486	0.498	0.316	0.345	0.473	0.517	0.326	0.5	0.482	0.501	0.308	0.39	0.475	0.509	0.386	0.538	0.505	0.525	0.371	0.356	0.456	0.494	0.393	0.529	0.457	0.461	0.331	0.572	0.589	0.587	0.57	0.626	0.571	0.57	0.474
	350	0.419	0.518	0.561	0.428	0.548	0.561	0.555	0.404	0.383	0.507	0.565	0.407	0.497	0.543	0.539	0.373	0.387	0.509	0.563	0.396	0.5	0.532	0.54	0.361	0.413	0.514	0.561	0.412	0.56	0.571	0.555	0.404	0.431	0.498	0.538	0.45	0.551	0.503	0.508	0.379	0.585	0.606	0.598	0.582	0.638	0.657	0.588	0.522
	400	0.444	0.554	0.602	0.446	0.62	0.623	0.594	0.452	0.441	0.545	0.603	0.433	0.497	0.581	0.587	0.424	0.416	0.543	0.602	0.459	0.5	0.596	0.583	0.414	0.442	0.551	0.603	0.435	0.62	0.612	0.594	0.448	0.431	0.524	0.574	0.437	0.551	0.579	0.555	0.427	0.599	0.625	0.618	0.597	0.651	0.679	0.604	0.569
	450	0.468	0.59	0.636	0.467	0.624	0.659	0.627	0.477	0.497	0.569	0.632	0.554	0.497	0.642	0.627	0.472	0.5	0.566	0.634	0.505	0.5	0.658	0.625	0.471	0.459	0.588	0.635	0.461	0.622	0.669	0.627	0.469	0.469	0.542	0.609	0.518	0.551	0.614	0.599	0.497	0.611	0.649	0.678	0.612	0.676	0.692	0.623	0.601
	500	0.508	0.608	0.664	0.51	0.624	0.703	0.643	0.506	0.503	0.584	0.653	0.611	0.537	0.683	0.638	0.533	0.5	0.581	0.653	0.588	0.534	0.678	0.64	0.534	0.518	0.607	0.665	0.519	0.622	0.709	0.643	0.512	0.531	0.549	0.644	0.543	0.551	0.676	0.621	0.541	0.624	0.674	0.705	0.621	0.68	0.753	0.65	0.626
150	50	0.134	0.186	0.17	0.079	0.212	0.104	0.158	0.063	0.061	0.12	0.113	0.058	0.173	0.106	0.108	0.054	0.067	0.136	0.105	0.061	0.199	0.093	0.109	0.059	0.13	0.176	0.17	0.084	0.235	0.103	0.152	0.07	0.088	0.105	0.105	0.056	0.158	0.087	0.095	0.066	0.32	0.344	0.347	0.317	0.382	0.124	0.322	0.086
	100	0.192	0.265	0.221	0.146	0.302	0.191	0.243	0.132	0.145	0.204	0.213	0.116	0.229	0.183	0.183	0.115	0.105	0.207	0.209	0.105	0.314	0.183	0.19	0.114	0.169	0.262	0.219	0.133	0.317	0.181	0.241	0.133	0.142	0.198	0.206	0.113	0.275	0.164	0.169	0.131	0.358	0.411	0.404	0.358	0.455	0.26	0.355	0.182
	150	0.223	0.317	0.287	0.219	0.352	0.276	0.328	0.188	0.215	0.285	0.312	0.193	0.298	0.242	0.268	0.173	0.185	0.287	0.302	0.193	0.386	0.262	0.276	0.157	0.214	0.32	0.293	0.212	0.415	0.28	0.328	0.191	0.214	0.273	0.295	0.19	0.295	0.231	0.236	0.19	0.419	0.457	0.461	0.429	0.51	0.343	0.426	0.257
	200	0.261	0.356	0.374	0.26	0.389	0.374	0.385	0.239	0.256	0.357	0.39	0.271	0.385	0.316	0.342	0.229	0.248	0.349	0.389	0.246	0.402	0.332	0.348	0.21	0.248	0.357	0.37	0.244	0.462	0.341	0.386	0.24	0.295	0.328	0.343	0.21	0.379	0.298	0.304	0.235	0.463	0.499	0.494	0.467	0.532	0.416	0.462	0.333
	250	0.292	0.409	0.457	0.287	0.437	0.441	0.439	0.288	0.312	0.399	0.435	0.362	0.385	0.391	0.404	0.298	0.288	0.397	0.437	0.276	0.454	0.396	0.41	0.262	0.285	0.407	0.453	0.279	0.475	0.416	0.442	0.283	0.295	0.376	0.399	0.277	0.433	0.375	0.361	0.285	0.504	0.523	0.514	0.504	0.568	0.474	0.508	0.402
	300	0.332	0.457	0.502	0.322	0.481	0.477	0.481	0.323	0.385	0.444	0.479	0.356	0.385	0.466	0.455	0.342	0.328	0.437	0.486	0.362	0.508	0.444	0.46	0.327	0.312	0.452	0.498	0.312	0.509	0.494	0.483	0.321	0.305	0.412	0.446	0.326	0.447	0.418	0.421	0.349	0.522	0.545	0.53	0.52	0.579	0.549	0.531	0.457
	350	0.356	0.494	0.544	0.359	0.481	0.537	0.525	0.365	0.385	0.476	0.521	0.424	0.385	0.5	0.504	0.379	0.404	0.476	0.527	0.381	0.514	0.501	0.514	0.38	0.356	0.488	0.539	0.37	0.551	0.532	0.531	0.353	0.383	0.432	0.488	0.391	0.447	0.483	0.466	0.403	0.538	0.565	0.56	0.536	0.593	0.605	0.552	0.498
	400	0.413	0.525	0.576	0.425	0.481	0.582	0.565	0.408	0.415	0.492	0.553	0.444	0.433	0.554	0.55	0.437	0.404	0.499	0.561	0.472	0.514	0.565	0.564	0.438	0.415	0.522	0.57	0.428	0.551	0.589	0.568	0.412	0.437	0.446	0.528	0.434	0.447	0.53	0.516	0.439	0.552	0.59	0.621	0.554	0.619	0.643	0.567	0.537
	450	0.481	0.541	0.609	0.467	0.481	0.62	0.592	0.468	0.481	0.502	0.59	0.487	0.495	0.599	0.575	0.493	0.478	0.511	0.59	0.49	0.514	0.628	0.585	0.492	0.477	0.537	0.598	0.509	0.551	0.619	0.593	0.469	0.45	0.45	0.571	0.469	0.45	0.575	0.545	0.45	0.563	0.618	0.65	0.564	0.624	0.676	0.598	0.565
	500	0.515	0.549	0.639	0.517	0.535	0.664	0.609	0.525	0.505	0.505	0.632	0.598	0.505	0.647	0.602	0.505	0.514	0.514	0.627	0.562	0.514	0.629	0.606	0.514	0.515	0.548	0.63	0.539	0.551	0.664	0.609	0.525	0.5	0.5	0.612	0.512	0.5	0.634	0.581	0.5	0.585	0.636	0.686	0.585	0.624	0.7	0.614	0.586
200	50	0.093	0.151	0.126	0.078	0.209	0.096	0.125	0.062	0.094	0.101	0.102	0.058	0.131	0.087	0.092	0.062	0.104	0.11	0.111	0.065	0.175	0.079	0.087	0.065	0.07	0.147	0.114	0.066	0.174	0.092	0.112	0.059	0.078	0.102	0.11	0.054	0.15	0.077	0.079	0.066	0.262	0.275	0.271	0.239	0.332	0.13	0.254	0.087
	100	0.145	0.229	0.209	0.13	0.31	0.18	0.22	0.121	0.159	0.192	0.221	0.134	0.205	0.163	0.16	0.122	0.169	0.201	0.227	0.176	0.294	0.173	0.172	0.124	0.124	0.217	0.206	0.117	0.246	0.193	0.211	0.109	0.183	0.19	0.208	0.148	0.215	0.141	0.145	0.123	0.309	0.357	0.353	0.312	0.403	0.231	0.328	0.163
	150	0.177	0.278	0.299	0.17	0.389	0.267	0.288	0.174	0.216	0.271	0.304	0.178	0.297	0.241	0.244	0.195	0.198	0.274	0.319	0.169	0.318	0.23	0.256	0.188	0.16	0.278	0.3	0.157	0.305	0.251	0.281	0.157	0.201	0.253	0.261	0.189	0.293	0.224	0.213	0.181	0.372	0.405	0.406	0.375	0.46	0.326	0.399	0.246
	200	0.212	0.343	0.388	0.208	0.405	0.328	0.355	0.215	0.297	0.325	0.351	0.23	0.297	0.306	0.313	0.251	0.267	0.324	0.365	0.259	0.396	0.314	0.324	0.239	0.216	0.334	0.385	0.212	0.381	0.331	0.347	0.205	0.201	0.305	0.318	0.23	0.347	0.283	0.273	0.247	0.411	0.444	0.433	0.413	0.488	0.388	0.438	0.316
	250	0.253	0.388	0.433	0.267	0.447	0.402	0.4	0.254	0.297	0.379	0.395	0.314	0.297	0.354	0.373	0.285	0.318	0.377	0.41	0.324	0.438	0.364	0.381	0.29	0.254	0.385	0.433	0.263	0.396	0.385	0.393	0.251	0.283	0.336	0.368	0.301	0.361	0.355	0.337	0.307	0.437	0.466	0.452	0.432	0.528	0.454	0.474	0.355
	300	0.317	0.428	0.475	0.322	0.485	0.454	0.451	0.317	0.303	0.407	0.445	0.377	0.311	0.416	0.425	0.345	0.318	0.407	0.452	0.325	0.442	0.425	0.436	0.332	0.336	0.424	0.471	0.351	0.396	0.43	0.445	0.321	0.337	0.356	0.41	0.33	0.361	0.407	0.387	0.347	0.457	0.493	0.494	0.457	0.539	0.521	0.495	0.398
	350	0.405	0.459	0.513	0.407	0.485	0.519	0.497	0.38	0.385	0.425	0.483	0.436	0.389	0.496	0.479	0.405	0.374	0.43	0.488	0.419	0.442	0.484	0.491	0.4	0.396	0.454	0.504	0.383	0.396	0.526	0.5	0.376	0.361	0.361	0.454	0.394	0.361	0.447	0.442	0.361	0.482	0.523	0.549	0.481	0.542	0.57	0.519	0.458
	400	0.405	0.477	0.547	0.428	0.485	0.557	0.532	0.427	0.429	0.435	0.522	0.446	0.429	0.538	0.514	0.429	0.432	0.44	0.525	0.43	0.442	0.534	0.521	0.436	0.404	0.471	0.539	0.448	0.422	0.557	0.536	0.43	0.4	0.4	0.501	0.426	0.4	0.498	0.48	0.4	0.504	0.542	0.576	0.506	0.588	0.605	0.536	0.491
	450	0.471	0.485	0.576	0.5	0.485	0.599	0.559	0.479	0.45	0.45	0.561	0.474	0.45	0.571	0.549	0.45	0.45	0.45	0.564	0.503	0.45	0.576	0.551	0.45	0.472	0.482	0.571	0.492	0.478	0.59	0.559	0.476	0.45	0.45	0.544	0.497	0.45	0.562	0.521	0.45	0.515	0.568	0.611	0.515	0.588	0.631	0.558	0.514
	500	0.5	0.5	0.613	0.548	0.5	0.625	0.57	0.5	0.5	0.5	0.609	0.551	0.5	0.616	0.567	0.5	0.5	0.5	0.605	0.557	0.5	0.62	0.567	0.5	0.5	0.5	0.61	0.541	0.5	0.64	0.57	0.5	0.5	0.5	0.582	0.577	0.5	0.588	0.553	0.5	0.53	0.582	0.638	0.529	0.588	0.681	0.581	0.532
250	50	0.081	0.126	0.108	0.057	0.171	0.095	0.12	0.064	0.09	0.104	0.122	0.063	0.114	0.075	0.075	0.077	0.076	0.111	0.123	0.058	0.149	0.077	0.075	0.07	0.07	0.115	0.108	0.06	0.155	0.092	0.104	0.062	0.096	0.102	0.103	0.061	0.112	0.066	0.066	0.069	0.229	0.252	0.24	0.224	0.307	0.109	0.23	0.091
	100	0.121	0.2	0.216	0.118	0.212	0.18	0.199	0.108	0.17	0.19	0.215	0.133	0.206	0.148	0.156	0.134	0.171	0.191	0.208	0.12	0.222	0.157	0.153	0.13	0.12	0.2	0.22	0.151	0.212	0.177	0.183	0.106	0.104	0.168	0.158	0.114	0.19	0.135	0.126	0.134	0.295	0.326	0.332	0.295	0.377	0.225	0.305	0.17
	150	0.173	0.268	0.314	0.183	0.3	0.245	0.271	0.158	0.206	0.252	0.269	0.226	0.206	0.211	0.228	0.183	0.198	0.243	0.264	0.157	0.296	0.212	0.222	0.182	0.188	0.268	0.318	0.186	0.316	0.24	0.258	0.158	0.182	0.223	0.215	0.168	0.244	0.189	0.189	0.198	0.347	0.384	0.368	0.352	0.423	0.292	0.367	0.232
	200	0.225	0.323	0.368	0.242	0.339	0.317	0.324	0.219	0.206	0.309	0.317	0.252	0.206	0.307	0.296	0.24	0.202	0.292	0.314	0.217	0.332	0.282	0.285	0.246	0.235	0.321	0.362	0.246	0.322	0.305	0.315	0.229	0.244	0.25	0.269	0.243	0.256	0.244	0.25	0.244	0.376	0.41	0.392	0.375	0.468	0.359	0.407	0.302
	250	0.315	0.365	0.407	0.313	0.339	0.375	0.377	0.287	0.28	0.34	0.364	0.275	0.28	0.348	0.348	0.306	0.282	0.319	0.358	0.301	0.336	0.334	0.343	0.304	0.322	0.367	0.405	0.322	0.322	0.372	0.37	0.282	0.256	0.256	0.318	0.263	0.256	0.302	0.303	0.256	0.398	0.438	0.439	0.397	0.482	0.447	0.444	0.348
	300	0.339	0.398	0.447	0.387	0.339	0.443	0.434	0.33	0.34	0.361	0.402	0.339	0.34	0.406	0.413	0.352	0.328	0.334	0.399	0.346	0.336	0.403	0.402	0.33	0.322	0.396	0.443	0.36	0.322	0.428	0.428	0.334	0.3	0.3	0.365	0.312	0.3	0.369	0.356	0.3	0.425	0.47	0.494	0.421	0.488	0.495	0.465	0.388
	350	0.361	0.419	0.483	0.385	0.369	0.482	0.474	0.387	0.368	0.368	0.451	0.388	0.368	0.457	0.449	0.368	0.35	0.35	0.441	0.366	0.35	0.443	0.443	0.35	0.37	0.418	0.479	0.402	0.37	0.485	0.472	0.388	0.35	0.35	0.419	0.367	0.35	0.412	0.403	0.35	0.445	0.49	0.521	0.451	0.534	0.543	0.486	0.428
	400	0.423	0.431	0.516	0.435	0.425	0.532	0.509	0.427	0.4	0.4	0.497	0.419	0.4	0.501	0.493	0.4	0.4	0.4	0.488	0.425	0.4	0.492	0.486	0.4	0.422	0.426	0.513	0.475	0.422	0.53	0.509	0.424	0.4	0.4	0.47	0.421	0.4	0.463	0.448	0.4	0.459	0.512	0.557	0.461	0.534	0.586	0.511	0.459
	450	0.45	0.45	0.553	0.483	0.45	0.578	0.52	0.45	0.45	0.45	0.541	0.459	0.45	0.543	0.513	0.45	0.45	0.45	0.533	0.485	0.45	0.534	0.511	0.45	0.45	0.45	0.553	0.525	0.45	0.565	0.52	0.45	0.45	0.45	0.512	0.474	0.45	0.509	0.491	0.45	0.473	0.528	0.586	0.471	0.534	0.619	0.531	0.471
	500	0.5	0.5	0.593	0.551	0.5	0.605	0.527	0.5	0.5	0.5	0.58	0.509	0.5	0.591	0.527	0.5	0.5	0.5	0.569	0.522	0.5	0.59	0.527	0.5	0.5	0.5	0.594	0.524	0.5	0.614	0.527	0.5	0.5	0.5	0.561	0.53	0.5	0.571	0.522	0.5	0.512	0.534	0.613	0.506	0.534	0.639	0.547	0.512
300	50	0.061	0.111	0.122	0.076	0.128	0.087	0.09	0.053	0.088	0.1	0.116	0.057	0.109	0.076	0.072	0.075	0.105	0.099	0.123	0.064	0.123	0.072	0.064	0.078	0.087	0.114	0.128	0.057	0.129	0.084	0.095	0.06	0.052	0.094	0.083	0.055	0.106	0.061	0.062	0.07	0.19	0.236	0.228	0.193	0.284	0.104	0.206	0.082
	100	0.14	0.194	0.221	0.141	0.213	0.164	0.168	0.115	0.148	0.177	0.185	0.12	0.148	0.136	0.148	0.13	0.123	0.166	0.177	0.123	0.123	0.142	0.131	0.122	0.142	0.198	0.225	0.122	0.219	0.152	0.176	0.117	0.13	0.156	0.141	0.108	0.164	0.124	0.119	0.142	0.265	0.304	0.301	0.267	0.357	0.225	0.285	0.163
	150	0.189	0.253	0.28	0.204	0.246	0.235	0.226	0.177	0.152	0.241	0.244	0.18	0.152	0.209	0.215	0.194	0.173	0.22	0.232	0.156	0.173	0.196	0.2	0.195	0.177	0.257	0.284	0.172	0.249	0.235	0.236	0.18	0.184	0.192	0.197	0.16	0.196	0.179	0.175	0.186	0.311	0.347	0.331	0.313	0.397	0.288	0.326	0.235
	200	0.246	0.299	0.325	0.225	0.246	0.289	0.284	0.228	0.236	0.273	0.295	0.212	0.236	0.265	0.272	0.26	0.235	0.254	0.281	0.212	0.235	0.252	0.256	0.243	0.249	0.3	0.328	0.246	0.249	0.297	0.293	0.227	0.2	0.2	0.249	0.214	0.2	0.244	0.234	0.2	0.341	0.376	0.372	0.341	0.426	0.375	0.381	0.283
	250	0.254	0.332	0.366	0.275	0.26	0.365	0.349	0.29	0.288	0.298	0.334	0.268	0.288	0.345	0.339	0.294	0.267	0.267	0.323	0.258	0.267	0.32	0.322	0.267	0.251	0.338	0.371	0.272	0.259	0.367	0.356	0.289	0.25	0.25	0.294	0.261	0.25	0.3	0.286	0.25	0.364	0.411	0.432	0.362	0.438	0.406	0.411	0.329
	300	0.326	0.355	0.407	0.363	0.33	0.406	0.397	0.338	0.302	0.302	0.385	0.333	0.302	0.384	0.381	0.302	0.3	0.3	0.367	0.326	0.3	0.379	0.375	0.3	0.329	0.364	0.411	0.342	0.335	0.397	0.402	0.345	0.3	0.3	0.349	0.311	0.3	0.358	0.338	0.3	0.389	0.432	0.465	0.391	0.474	0.467	0.434	0.377
	350	0.362	0.362	0.442	0.398	0.362	0.453	0.45	0.362	0.35	0.35	0.434	0.389	0.35	0.45	0.425	0.35	0.35	0.35	0.416	0.393	0.35	0.427	0.427	0.35	0.369	0.371	0.448	0.402	0.371	0.457	0.453	0.371	0.35	0.35	0.402	0.362	0.35	0.396	0.388	0.35	0.411	0.454	0.501	0.411	0.474	0.507	0.454	0.402
	400	0.4	0.4	0.485	0.438	0.4	0.504	0.47	0.4	0.4	0.4	0.478	0.451	0.4	0.471	0.454	0.4	0.4	0.4	0.465	0.417	0.4	0.475	0.458	0.4	0.4	0.4	0.489	0.465	0.4	0.503	0.47	0.4	0.4	0.4	0.449	0.41	0.4	0.449	0.431	0.4	0.424	0.471	0.528	0.424	0.474	0.546	0.48	0.419
	450	0.45	0.45	0.528	0.495	0.45	0.538	0.477	0.45	0.45	0.45	0.522	0.478	0.45	0.527	0.475	0.45	0.45	0.45	0.506	0.452	0.45	0.53	0.476	0.45	0.45	0.45	0.53	0.527	0.45	0.548	0.477	0.45	0.45	0.45	0.491	0.462	0.45	0.493	0.468	0.45	0.458	0.474	0.559	0.454	0.474	0.591	0.5	0.458
	500	0.5	0.5	0.57	0.543	0.5	0.593	0.509	0.5	0.5	0.5	0.562	0.507	0.5	0.571	0.509	0.5	0.5	0.5	0.555	0.504	0.5	0.551	0.509	0.5	0.5	0.5	0.571	0.528	0.5	0.586	0.509	0.5	0.5	0.5	0.543	0.509	0.5	0.537	0.509	0.5	0.5	0.5	0.588	0.511	0.5	0.61	0.521	0.5
350	50	0.096	0.116	0.121	0.069	0.162	0.069	0.089	0.063	0.1	0.097	0.111	0.059	0.103	0.068	0.066	0.077	0.094	0.093	0.106	0.058	0.094	0.069	0.062	0.075	0.087	0.117	0.125	0.069	0.116	0.078	0.094	0.063	0.074	0.081	0.063	0.06	0.084	0.06	0.059	0.078	0.177	0.223	0.212	0.18	0.258	0.099	0.195	0.087
	100	0.138	0.19	0.213	0.142	0.22	0.154	0.154	0.126	0.103	0.172	0.167	0.108	0.103	0.138	0.139	0.131	0.106	0.164	0.163	0.12	0.106	0.135	0.13	0.136	0.122	0.194	0.219	0.118	0.212	0.154	0.156	0.128	0.128	0.128	0.12	0.109	0.128	0.114	0.112	0.128	0.246	0.284	0.275	0.245	0.323	0.204	0.267	0.165
	150	0.204	0.238	0.262	0.174	0.286	0.212	0.215	0.179	0.185	0.214	0.222	0.167	0.185	0.205	0.202	0.201	0.184	0.203	0.216	0.166	0.184	0.194	0.19	0.19	0.212	0.238	0.265	0.216	0.212	0.223	0.217	0.182	0.15	0.15	0.173	0.155	0.15	0.179	0.168	0.15	0.284	0.319	0.305	0.281	0.368	0.273	0.299	0.221
	200	0.204	0.28	0.309	0.217	0.31	0.282	0.284	0.234	0.231	0.241	0.268	0.207	0.231	0.26	0.266	0.237	0.224	0.226	0.258	0.254	0.224	0.254	0.257	0.224	0.212	0.281	0.311	0.234	0.212	0.291	0.286	0.23	0.2	0.2	0.226	0.208	0.2	0.229	0.223	0.2	0.307	0.351	0.36	0.307	0.381	0.333	0.348	0.274
	250	0.276	0.305	0.35	0.285	0.31	0.341	0.333	0.286	0.25	0.25	0.319	0.293	0.25	0.309	0.317	0.25	0.25	0.25	0.306	0.271	0.25	0.31	0.317	0.25	0.274	0.311	0.352	0.277	0.276	0.334	0.335	0.288	0.25	0.25	0.277	0.291	0.25	0.29	0.273	0.25	0.339	0.382	0.405	0.337	0.42	0.4	0.378	0.32
	300	0.31	0.31	0.383	0.318	0.31	0.378	0.389	0.31	0.3	0.3	0.374	0.336	0.3	0.364	0.363	0.3	0.3	0.3	0.358	0.322	0.3	0.364	0.366	0.3	0.316	0.316	0.385	0.323	0.316	0.391	0.39	0.316	0.3	0.3	0.33	0.307	0.3	0.329	0.321	0.3	0.358	0.4	0.436	0.359	0.426	0.457	0.399	0.348
	350	0.35	0.35	0.427	0.424	0.35	0.452	0.42	0.35	0.35	0.35	0.42	0.392	0.35	0.414	0.403	0.35	0.35	0.35	0.405	0.375	0.35	0.422	0.402	0.35	0.35	0.35	0.428	0.37	0.35	0.432	0.42	0.35	0.35	0.35	0.384	0.37	0.35	0.385	0.371	0.35	0.371	0.42	0.474	0.37	0.426	0.496	0.429	0.368
	400	0.4	0.4	0.471	0.466	0.4	0.487	0.427	0.4	0.4	0.4	0.465	0.403	0.4	0.458	0.423	0.4	0.4	0.4	0.45	0.43	0.4	0.46	0.424	0.4	0.4	0.4	0.471	0.459	0.4	0.474	0.427	0.4	0.4	0.4	0.429	0.408	0.4	0.433	0.413	0.4	0.412	0.426	0.502	0.405	0.426	0.528	0.452	0.412
	450	0.45	0.45	0.513	0.541	0.45	0.526	0.459	0.45	0.45	0.45	0.506	0.49	0.45	0.504	0.459	0.45	0.45	0.45	0.498	0.455	0.45	0.509	0.459	0.45	0.45	0.45	0.512	0.485	0.45	0.528	0.459	0.45	0.45	0.45	0.484	0.457	0.45	0.474	0.459	0.45	0.45	0.45	0.534	0.455	0.45	0.556	0.472	0.45
	500	0.5	0.5	0.555	0.521	0.5	0.564	0.5	0.5	0.5	0.5	0.545	0.505	0.5	0.55	0.5	0.5	0.5	0.5	0.538	0.509	0.5	0.534	0.5	0.5	0.5	0.5	0.553	0.519	0.5	0.551	0.5	0.5	0.5	0.5	0.528	0.506	0.5	0.525	0.5	0.5	0.5	0.5	0.56	0.51	0.5	0.59	0.504	0.5
400	50	0.083	0.107	0.127	0.065	0.107	0.079	0.077	0.062	0.063	0.09	0.09	0.056	0.063	0.075	0.062	0.063	0.065	0.089	0.09	0.075	0.065	0.076	0.059	0.064	0.085	0.108	0.125	0.072	0.153	0.078	0.08	0.063	0.07	0.07	0.054	0.05	0.07	0.059	0.057	0.07	0.16	0.193	0.195	0.163	0.226	0.128	0.176	0.082
	100	0.146	0.168	0.189	0.111	0.161	0.14	0.143	0.126	0.127	0.157	0.15	0.128	0.127	0.131	0.127	0.145	0.123	0.156	0.147	0.141	0.123	0.126	0.125	0.141	0.139	0.175	0.191	0.171	0.21	0.144	0.146	0.128	0.1	0.1	0.111	0.1	0.1	0.107	0.108	0.1	0.221	0.25	0.243	0.223	0.277	0.213	0.233	0.147
	150	0.161	0.219	0.238	0.188	0.161	0.202	0.216	0.173	0.183	0.191	0.202	0.173	0.183	0.186	0.188	0.185	0.179	0.186	0.2	0.188	0.179	0.184	0.188	0.181	0.166	0.224	0.241	0.191	0.258	0.21	0.217	0.168	0.15	0.15	0.163	0.15	0.15	0.167	0.159	0.15	0.249	0.28	0.28	0.248	0.297	0.267	0.273	0.213
	200	0.221	0.247	0.278	0.223	0.223	0.265	0.266	0.229	0.2	0.2	0.25	0.229	0.2	0.249	0.257	0.2	0.2	0.2	0.246	0.224	0.2	0.247	0.253	0.2	0.222	0.25	0.283	0.213	0.258	0.273	0.266	0.232	0.2	0.2	0.215	0.2	0.2	0.223	0.211	0.2	0.273	0.317	0.344	0.274	0.328	0.341	0.32	0.254
	250	0.251	0.251	0.316	0.262	0.251	0.326	0.323	0.251	0.25	0.25	0.306	0.296	0.25	0.296	0.303	0.25	0.25	0.25	0.299	0.265	0.25	0.298	0.305	0.25	0.258	0.258	0.318	0.289	0.258	0.327	0.323	0.258	0.25	0.25	0.266	0.25	0.25	0.268	0.257	0.25	0.295	0.345	0.375	0.296	0.328	0.383	0.35	0.286
	300	0.3	0.3	0.361	0.321	0.3	0.373	0.37	0.3	0.3	0.3	0.359	0.321	0.3	0.354	0.347	0.3	0.3	0.3	0.35	0.308	0.3	0.345	0.347	0.3	0.3	0.3	0.364	0.325	0.3	0.368	0.369	0.3	0.3	0.3	0.321	0.3	0.3	0.312	0.308	0.3	0.308	0.364	0.413	0.308	0.328	0.428	0.373	0.311
	350	0.35	0.35	0.413	0.396	0.35	0.421	0.377	0.35	0.35	0.35	0.409	0.36	0.35	0.399	0.37	0.35	0.35	0.35	0.398	0.354	0.35	0.403	0.372	0.35	0.35	0.35	0.414	0.395	0.35	0.408	0.377	0.35	0.35	0.35	0.37	0.35	0.35	0.369	0.359	0.35	0.36	0.37	0.448	0.36	0.364	0.465	0.399	0.364
	400	0.4	0.4	0.453	0.439	0.4	0.463	0.409	0.4	0.4	0.4	0.448	0.413	0.4	0.441	0.409	0.4	0.4	0.4	0.443	0.439	0.4	0.446	0.409	0.4	0.4	0.4	0.456	0.426	0.4	0.464	0.409	0.4	0.4	0.4	0.42	0.4	0.4	0.415	0.409	0.4	0.4	0.4	0.481	0.414	0.4	0.503	0.42	0.4
	450	0.45	0.45	0.497	0.461	0.45	0.504	0.45	0.45	0.45	0.45	0.492	0.497	0.45	0.487	0.45	0.45	0.45	0.45	0.485	0.49	0.45	0.488	0.45	0.45	0.45	0.45	0.498	0.486	0.45	0.495	0.45	0.45	0.45	0.45	0.467	0.45	0.45	0.464	0.45	0.45	0.45	0.45	0.512	0.465	0.45	0.528	0.453	0.45
	500	0.5	0.5	0.529	0.539	0.5	0.534	0.5	0.5	0.5	0.5	0.53	0.511	0.5	0.526	0.5	0.5	0.5	0.5	0.526	0.53	0.5	0.525	0.5	0.5	0.5	0.5	0.53	0.532	0.5	0.54	0.5	0.5	0.5	0.5	0.513	0.5	0.5	0.509	0.5	0.5	0.5	0.5	0.539	0.511	0.5	0.555	0.5	0.5
450	50	0.073	0.108	0.124	0.065	0.121	0.071	0.075	0.067	0.073	0.084	0.072	0.066	0.093	0.06	0.061	0.079	0.05	0.084	0.083	0.064	0.05	0.062	0.061	0.068	0.075	0.107	0.12	0.067	0.115	0.068	0.072	0.065	0.052	0.052	0.051	0.05	0.052	0.056	0.056	0.052	0.146	0.175	0.177	0.146	0.204	0.094	0.155	0.08
	100	0.139	0.161	0.179	0.127	0.139	0.146	0.147	0.125	0.137	0.14	0.132	0.118	0.143	0.122	0.123	0.137	0.128	0.138	0.141	0.122	0.128	0.131	0.123	0.13	0.142	0.162	0.178	0.109	0.142	0.139	0.15	0.123	0.1	0.1	0.108	0.1	0.1	0.112	0.106	0.1	0.192	0.222	0.204	0.198	0.268	0.165	0.205	0.142
	150	0.161	0.203	0.228	0.185	0.163	0.202	0.204	0.175	0.15	0.15	0.183	0.156	0.15	0.181	0.181	0.15	0.152	0.152	0.193	0.165	0.152	0.189	0.185	0.152	0.158	0.205	0.227	0.171	0.16	0.207	0.203	0.176	0.15	0.15	0.161	0.15	0.15	0.16	0.158	0.15	0.22	0.26	0.277	0.219	0.281	0.241	0.251	0.194
	200	0.217	0.219	0.268	0.212	0.217	0.258	0.263	0.219	0.2	0.2	0.233	0.24	0.2	0.238	0.232	0.2	0.2	0.2	0.238	0.232	0.2	0.231	0.241	0.2	0.216	0.222	0.269	0.255	0.216	0.262	0.262	0.22	0.2	0.2	0.21	0.2	0.2	0.211	0.203	0.2	0.242	0.29	0.315	0.241	0.325	0.318	0.296	0.23
	250	0.25	0.25	0.303	0.266	0.25	0.313	0.315	0.25	0.25	0.25	0.293	0.253	0.25	0.286	0.282	0.25	0.25	0.25	0.291	0.255	0.25	0.295	0.286	0.25	0.25	0.25	0.305	0.267	0.25	0.32	0.314	0.25	0.25	0.25	0.261	0.25	0.25	0.267	0.253	0.25	0.261	0.314	0.348	0.26	0.325	0.363	0.322	0.263
	300	0.3	0.3	0.355	0.312	0.3	0.356	0.327	0.3	0.3	0.3	0.343	0.307	0.3	0.338	0.315	0.3	0.3	0.3	0.341	0.316	0.3	0.342	0.32	0.3	0.3	0.3	0.355	0.31	0.3	0.364	0.327	0.3	0.3	0.3	0.313	0.3	0.3	0.31	0.303	0.3	0.311	0.325	0.389	0.315	0.325	0.404	0.351	0.313
	350	0.35	0.35	0.399	0.377	0.35	0.407	0.359	0.35	0.35	0.35	0.392	0.391	0.35	0.397	0.359	0.35	0.35	0.35	0.392	0.372	0.35	0.38	0.359	0.35	0.35	0.35	0.398	0.389	0.35	0.407	0.359	0.35	0.35	0.35	0.361	0.35	0.35	0.364	0.359	0.35	0.35	0.35	0.424	0.351	0.35	0.44	0.376	0.35
	400	0.4	0.4	0.441	0.406	0.4	0.445	0.4	0.4	0.4	0.4	0.436	0.425	0.4	0.426	0.4	0.4	0.4	0.4	0.431	0.41	0.4	0.437	0.4	0.4	0.4	0.4	0.442	0.427	0.4	0.449	0.4	0.4	0.4	0.4	0.412	0.4	0.4	0.406	0.4	0.4	0.4	0.4	0.459	0.405	0.4	0.479	0.406	0.4
	450	0.45	0.45	0.477	0.487	0.45	0.481	0.45	0.45	0.45	0.45	0.475	0.472	0.45	0.472	0.45	0.45	0.45	0.45	0.472	0.48	0.45	0.47	0.45	0.45	0.45	0.45	0.478	0.469	0.45	0.486	0.45	0.45	0.45	0.45	0.46	0.45	0.45	0.458	0.45	0.45	0.45	0.45	0.487	0.453	0.45	0.496	0.45	0.45
	500	0.5	0.5	0.517	0.514	0.5	0.517	0.5	0.5	0.5	0.5	0.514	0.538	0.5	0.514	0.5	0.5	0.5	0.5	0.514	0.524	0.5	0.514	0.5	0.5	0.5	0.5	0.518	0.509	0.5	0.517	0.5	0.5	0.5	0.5	0.51	0.5	0.5	0.503	0.5	0.5	0.5	0.5	0.517	0.508	0.5	0.528	0.5	0.5
500	50	0.078	0.1	0.105	0.059	0.096	0.075	0.073	0.06	0.071	0.08	0.068	0.071	0.087	0.065	0.061	0.077	0.073	0.084	0.066	0.06	0.073	0.061	0.061	0.081	0.075	0.102	0.105	0.062	0.096	0.068	0.072	0.06	0.05	0.05	0.051	0.05	0.05	0.055	0.05	0.05	0.134	0.161	0.162	0.132	0.177	0.082	0.15	0.078
	100	0.104	0.154	0.156	0.119	0.104	0.131	0.138	0.126	0.123	0.123	0.126	0.105	0.125	0.117	0.122	0.123	0.121	0.121	0.124	0.108	0.121	0.118	0.121	0.121	0.104	0.156	0.157	0.109	0.104	0.135	0.138	0.126	0.1	0.1	0.106	0.1	0.1	0.101	0.1	0.1	0.175	0.198	0.197	0.179	0.208	0.173	0.19	0.133
	150	0.168	0.179	0.208	0.159	0.168	0.197	0.201	0.172	0.15	0.15	0.178	0.165	0.15	0.176	0.172	0.15	0.15	0.15	0.176	0.153	0.15	0.175	0.171	0.15	0.168	0.179	0.209	0.175	0.168	0.205	0.201	0.172	0.15	0.15	0.157	0.15	0.15	0.16	0.15	0.15	0.201	0.237	0.259	0.2	0.244	0.249	0.24	0.187
	200	0.2	0.2	0.25	0.214	0.2	0.252	0.254	0.2	0.2	0.2	0.228	0.225	0.2	0.231	0.226	0.2	0.2	0.2	0.228	0.203	0.2	0.228	0.223	0.2	0.2	0.2	0.252	0.216	0.2	0.249	0.254	0.2	0.2	0.2	0.207	0.2	0.2	0.211	0.2	0.2	0.218	0.267	0.298	0.217	0.244	0.3	0.278	0.22
	250	0.25	0.25	0.299	0.261	0.25	0.297	0.277	0.25	0.25	0.25	0.286	0.275	0.25	0.289	0.268	0.25	0.25	0.25	0.286	0.256	0.25	0.276	0.264	0.25	0.25	0.25	0.299	0.262	0.25	0.296	0.277	0.25	0.25	0.25	0.258	0.25	0.25	0.26	0.25	0.25	0.256	0.285	0.338	0.259	0.262	0.345	0.303	0.26
	300	0.3	0.3	0.346	0.321	0.3	0.346	0.309	0.3	0.3	0.3	0.333	0.324	0.3	0.331	0.308	0.3	0.3	0.3	0.333	0.3	0.3	0.327	0.309	0.3	0.3	0.3	0.347	0.323	0.3	0.349	0.309	0.3	0.3	0.3	0.307	0.3	0.3	0.304	0.309	0.3	0.3	0.3	0.368	0.317	0.3	0.377	0.331	0.3
	350	0.35	0.35	0.392	0.361	0.35	0.389	0.35	0.35	0.35	0.35	0.381	0.367	0.35	0.383	0.35	0.35	0.35	0.35	0.382	0.356	0.35	0.368	0.35	0.35	0.35	0.35	0.392	0.36	0.35	0.386	0.35	0.35	0.35	0.35	0.358	0.35	0.35	0.356	0.35	0.35	0.35	0.35	0.405	0.364	0.35	0.426	0.361	0.35
	400	0.4	0.4	0.427	0.429	0.4	0.427	0.4	0.4	0.4	0.4	0.426	0.409	0.4	0.416	0.4	0.4	0.4	0.4	0.427	0.406	0.4	0.42	0.4	0.4	0.4	0.4	0.428	0.418	0.4	0.428	0.4	0.4	0.4	0.4	0.406	0.4	0.4	0.406	0.4	0.4	0.4	0.4	0.439	0.414	0.4	0.446	0.404	0.4
	450	0.45	0.45	0.466	0.465	0.45	0.473	0.45	0.45	0.45	0.45	0.464	0.461	0.45	0.458	0.45	0.45	0.45	0.45	0.465	0.464	0.45	0.464	0.45	0.45	0.45	0.45	0.466	0.463	0.45	0.472	0.45	0.45	0.45	0.45	0.456	0.45	0.45	0.457	0.45	0.45	0.45	0.45	0.469	0.466	0.45	0.473	0.45	0.45
	500	0.5	0.5	0.5	0.5	0.5	0.5	0.5	0.5	0.5	0.5	0.5	0.5	0.5	0.5	0.5	0.5	0.5	0.5	0.5	0.5	0.5	0.5	0.5	0.5	0.5	0.5	0.5	0.5	0.5	0.5	0.5	0.5	0.5	0.5	0.5	0.5	0.5	0.5	0.5	0.5	0.5	0.5	0.5	0.5	0.5	0.5	0.5	0.5
[truncated: 17 more columns]
